# Supplementary material for: New Nostocyclophanes from Nostoc linckia
Source: MDPI journal article supplement (doi:10.3390/md21020101), 2023-01-31

## New Nostocyclophanes from *Nostoc linckia*

## TABLE OF CONTENTS

|                                                                                                                           | <u>Page</u> |
|---------------------------------------------------------------------------------------------------------------------------|-------------|
| Figure S1. $^1\text{H}$ NMR Spectrum (500 MHz) of 1 in $\text{DMSO}_6$ .....                                              | 3           |
| Figure S2. $^{13}\text{C}$ NMR Spectrum (125 MHz) of 1 in $\text{DMSO}_6$ .....                                           | 4           |
| Figure S3. HSQC NMR Spectrum (500 MHz) of 1 in $\text{DMSO}_6$ .....                                                      | 5           |
| Figure S4. COSY NMR Spectrum (500 MHz) of 1 in $\text{DMSO}_6$ .....                                                      | 6           |
| Figure S5. HMBC Spectrum (500 MHz) of 1 in $\text{DMSO}_6$ .....                                                          | 7           |
| Figure S6. $^1\text{H}$ NMR Spectrum (500 MHz) of 2 in $\text{DMSO}_6$ .....                                              | 8           |
| Figure S7. $^{13}\text{C}$ NMR Spectrum (125 MHz) of 2 in $\text{DMSO}_6$ .....                                           | 9           |
| Figure S8. HSQC NMR Spectrum (500 MHz) of 2 in $\text{DMSO}_6$ .....                                                      | 10          |
| Figure S9. COSY NMR Spectrum (500 MHz) of 2 in $\text{DMSO}_6$ .....                                                      | 11          |
| Figure S10. HMBC Spectrum (500 MHz) of 2 in $\text{DMSO}_6$ .....                                                         | 12          |
| Figure S11. $^1\text{H}$ NMR Spectrum (500 MHz) of 3 in $\text{DMSO}_6$ .....                                             | 13          |
| Figure S12. $^{13}\text{C}$ NMR Spectrum (125 MHz) of 3 in $\text{DMSO}_6$ .....                                          | 14          |
| Figure S13. $^1\text{H}$ NMR Spectrum (500 MHz) of 4 in $\text{DMSO}_6$ .....                                             | 15          |
| Figure S14. $^{13}\text{C}$ NMR Spectrum (125 MHz) of 4 in $\text{DMSO}_6$ .....                                          | 16          |
| Figure S15. HSQC NMR Spectrum (500 MHz) of 4 in $\text{DMSO}_6$ .....                                                     | 17          |
| Figure S16. COSY NMR Spectrum (500 MHz) of 4 in $\text{DMSO}_6$ .....                                                     | 18          |
| Figure S17. HMBC Spectrum (500 MHz) of 4 in $\text{DMSO}_6$ .....                                                         | 19          |
| Figure S18. $^1\text{H}$ NMR Spectrum (500 MHz) of 5 in $\text{DMSO}_6$ .....                                             | 20          |
| Figure S19. $^{13}\text{C}$ NMR Spectrum (500 MHz) of 5 in $\text{DMSO}_6$ .....                                          | 21          |
| Figure S20. $^1\text{H}$ NMR Spectrum (500 MHz) of 6 in $\text{CDCl}_3$ .....                                             | 22          |
| Figure S21. $^{13}\text{C}$ NMR Spectrum (125 MHz) of 6 in $\text{CDCl}_3$ .....                                          | 23          |
| Figure S22. HSQC NMR Spectrum (500 MHz) of 6 in $\text{CDCl}_3$ .....                                                     | 24          |
| Figure S23. COSY NMR Spectrum (500 MHz) of 6 in $\text{CDCl}_3$ .....                                                     | 25          |
| Figure S24. HMBC Spectrum (500 MHz) of 6 in $\text{CDCl}_3$ .....                                                         | 26          |
| Figure S25. $^1\text{H}$ NMR Spectrum (500 MHz) of 6 in $\text{DMSO}_6$ .....                                             | 27          |
| Figure S26. $^{13}\text{C}$ NMR Spectrum (125 MHz) of 6 in $\text{DMSO}_6$ .....                                          | 28          |
| Figure S27. HR-ESI-MS Spectrum of 1 .....                                                                                 | 29          |
| Figure S28. HR-ESI-MS Spectrum of 2 .....                                                                                 | 30          |
| Figure S29. HR-ESI-MS Spectrum of 3 .....                                                                                 | 31          |
| Figure S30. HR-ESI-MS Spectrum of 4 .....                                                                                 | 32          |
| Figure S31. HR-ESI-MS Spectrum of 5 .....                                                                                 | 33          |
| Figure S32. HR-ESI-MS Spectrum of 6 .....                                                                                 | 34          |
| Figure S33. Electronic Circular Dichroism Spectra (MeOH) of Nostocyclophane D, Dedichloronostocyclophane D, and 1-5 ..... | 35          |
| Figure S34. Electronic Circular Dichroism Spectra (MeOH) of 6 .....                                                       | 36          |

**Figure S1.**  $^1\text{H}$  NMR Spectrum (500 MHz) of **1** in  $\text{DMSO}_6$

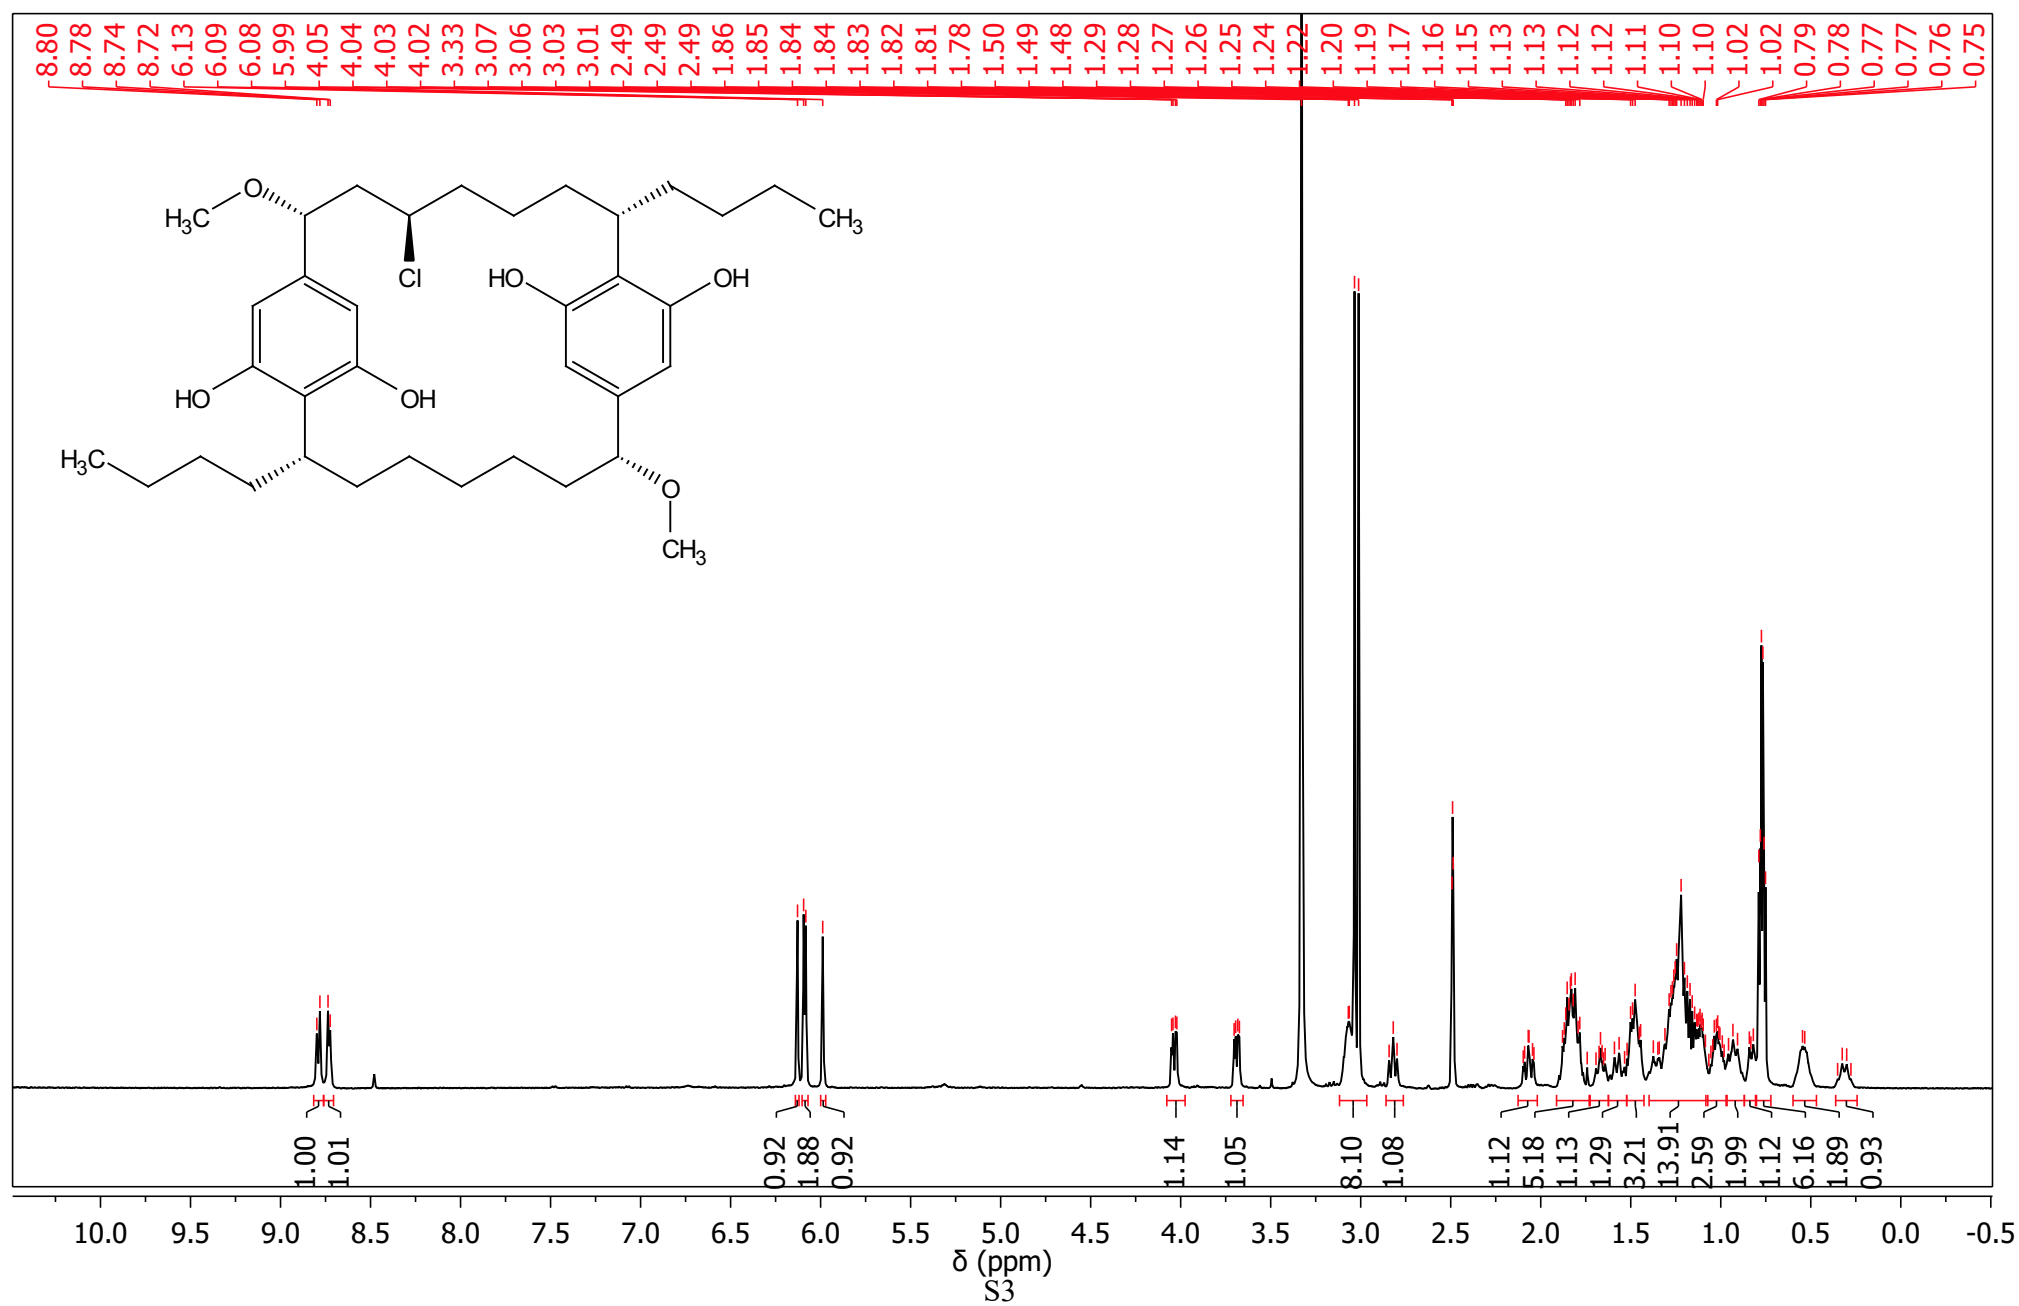

**Figure S2.**  $^{13}\text{C}$  NMR Spectrum (125 MHz) of **1** in  $\text{DMSO}_6$

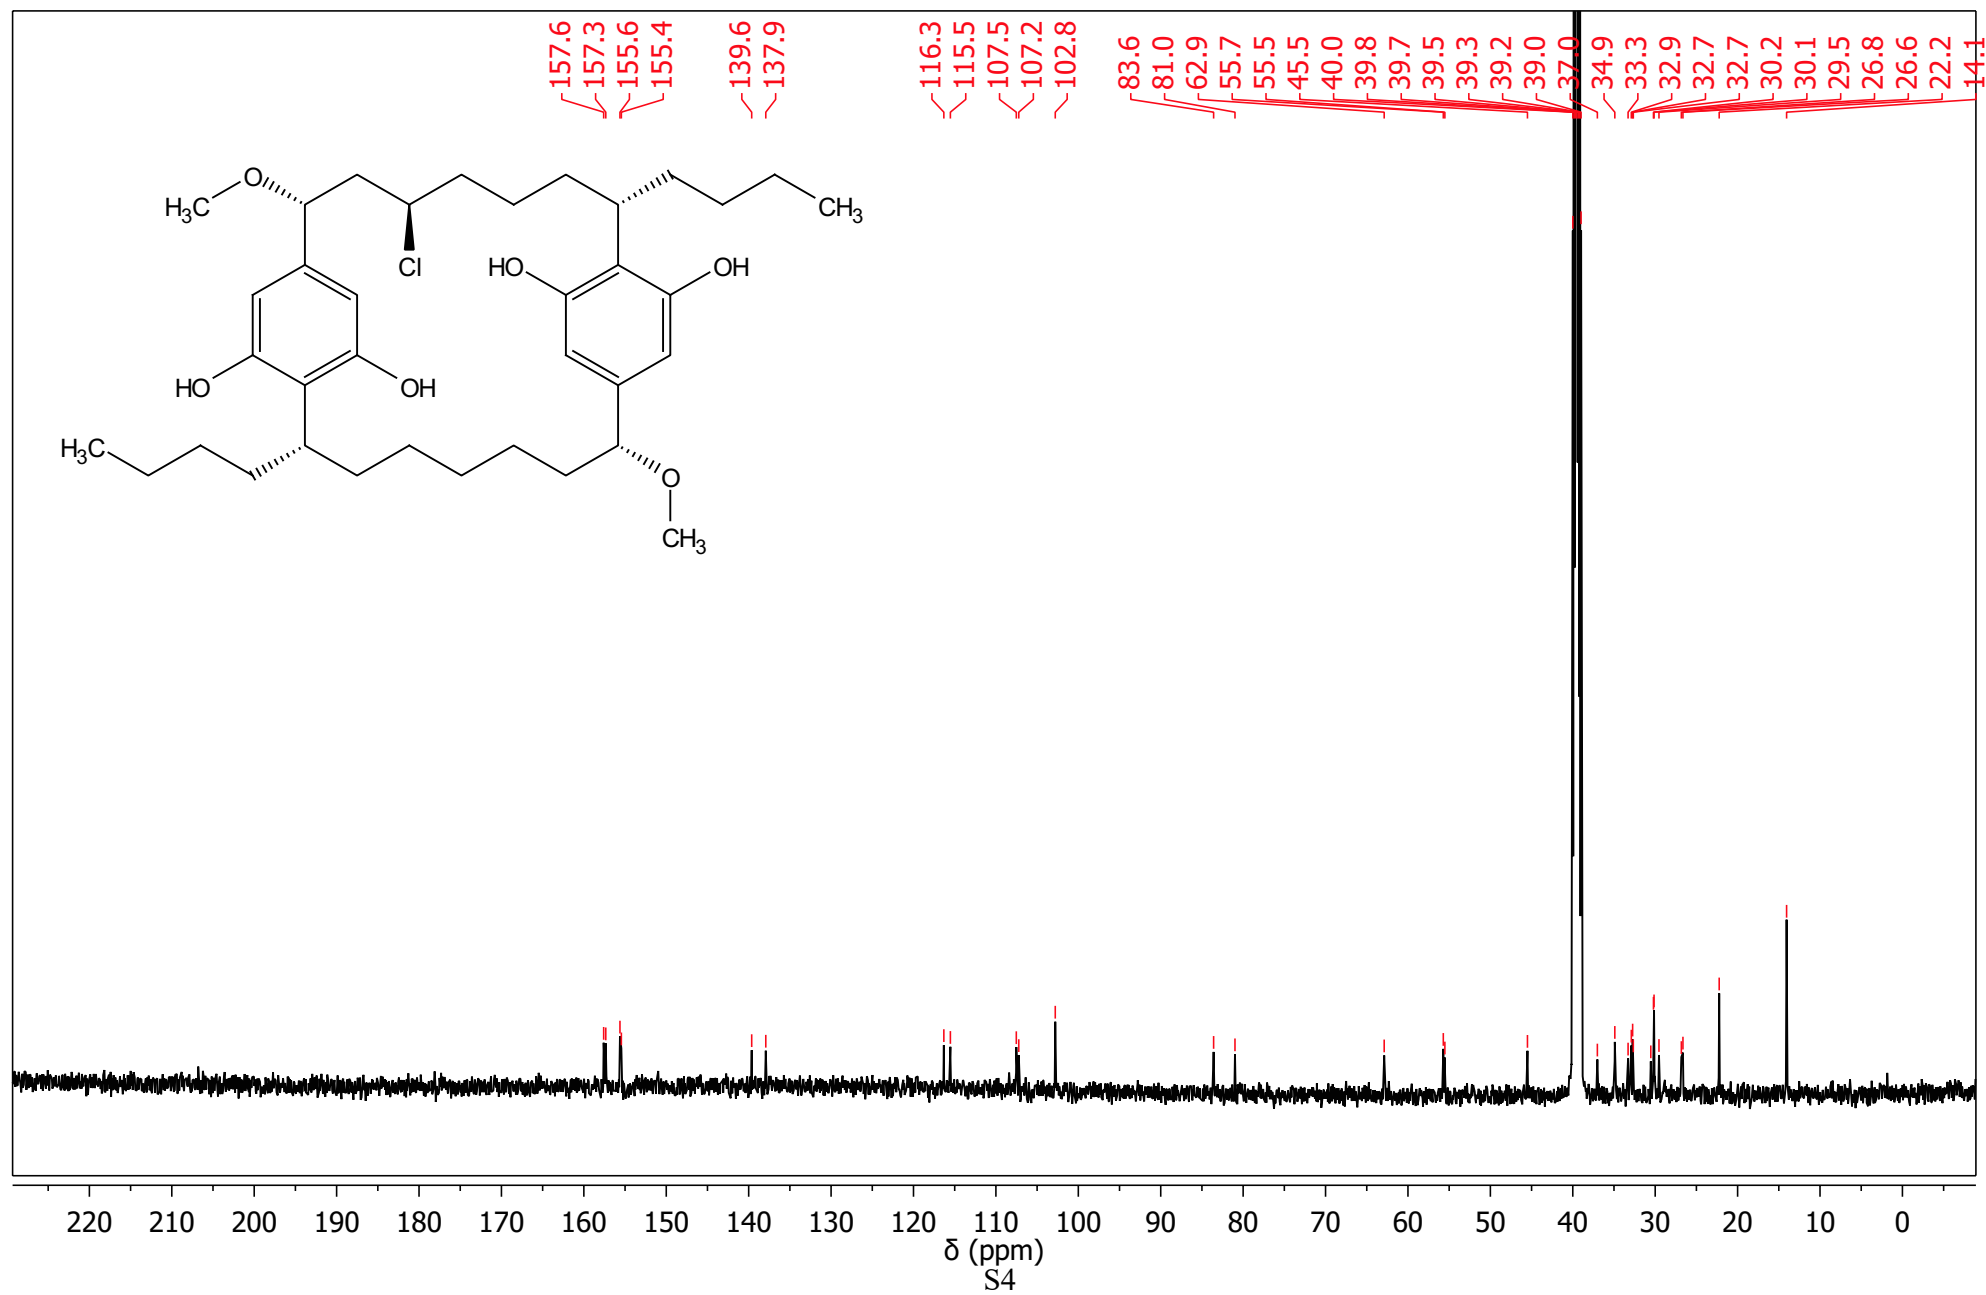

Figure S3. HSQC NMR Spectrum (500 MHz) of **1** in DMSO<sub>6</sub>

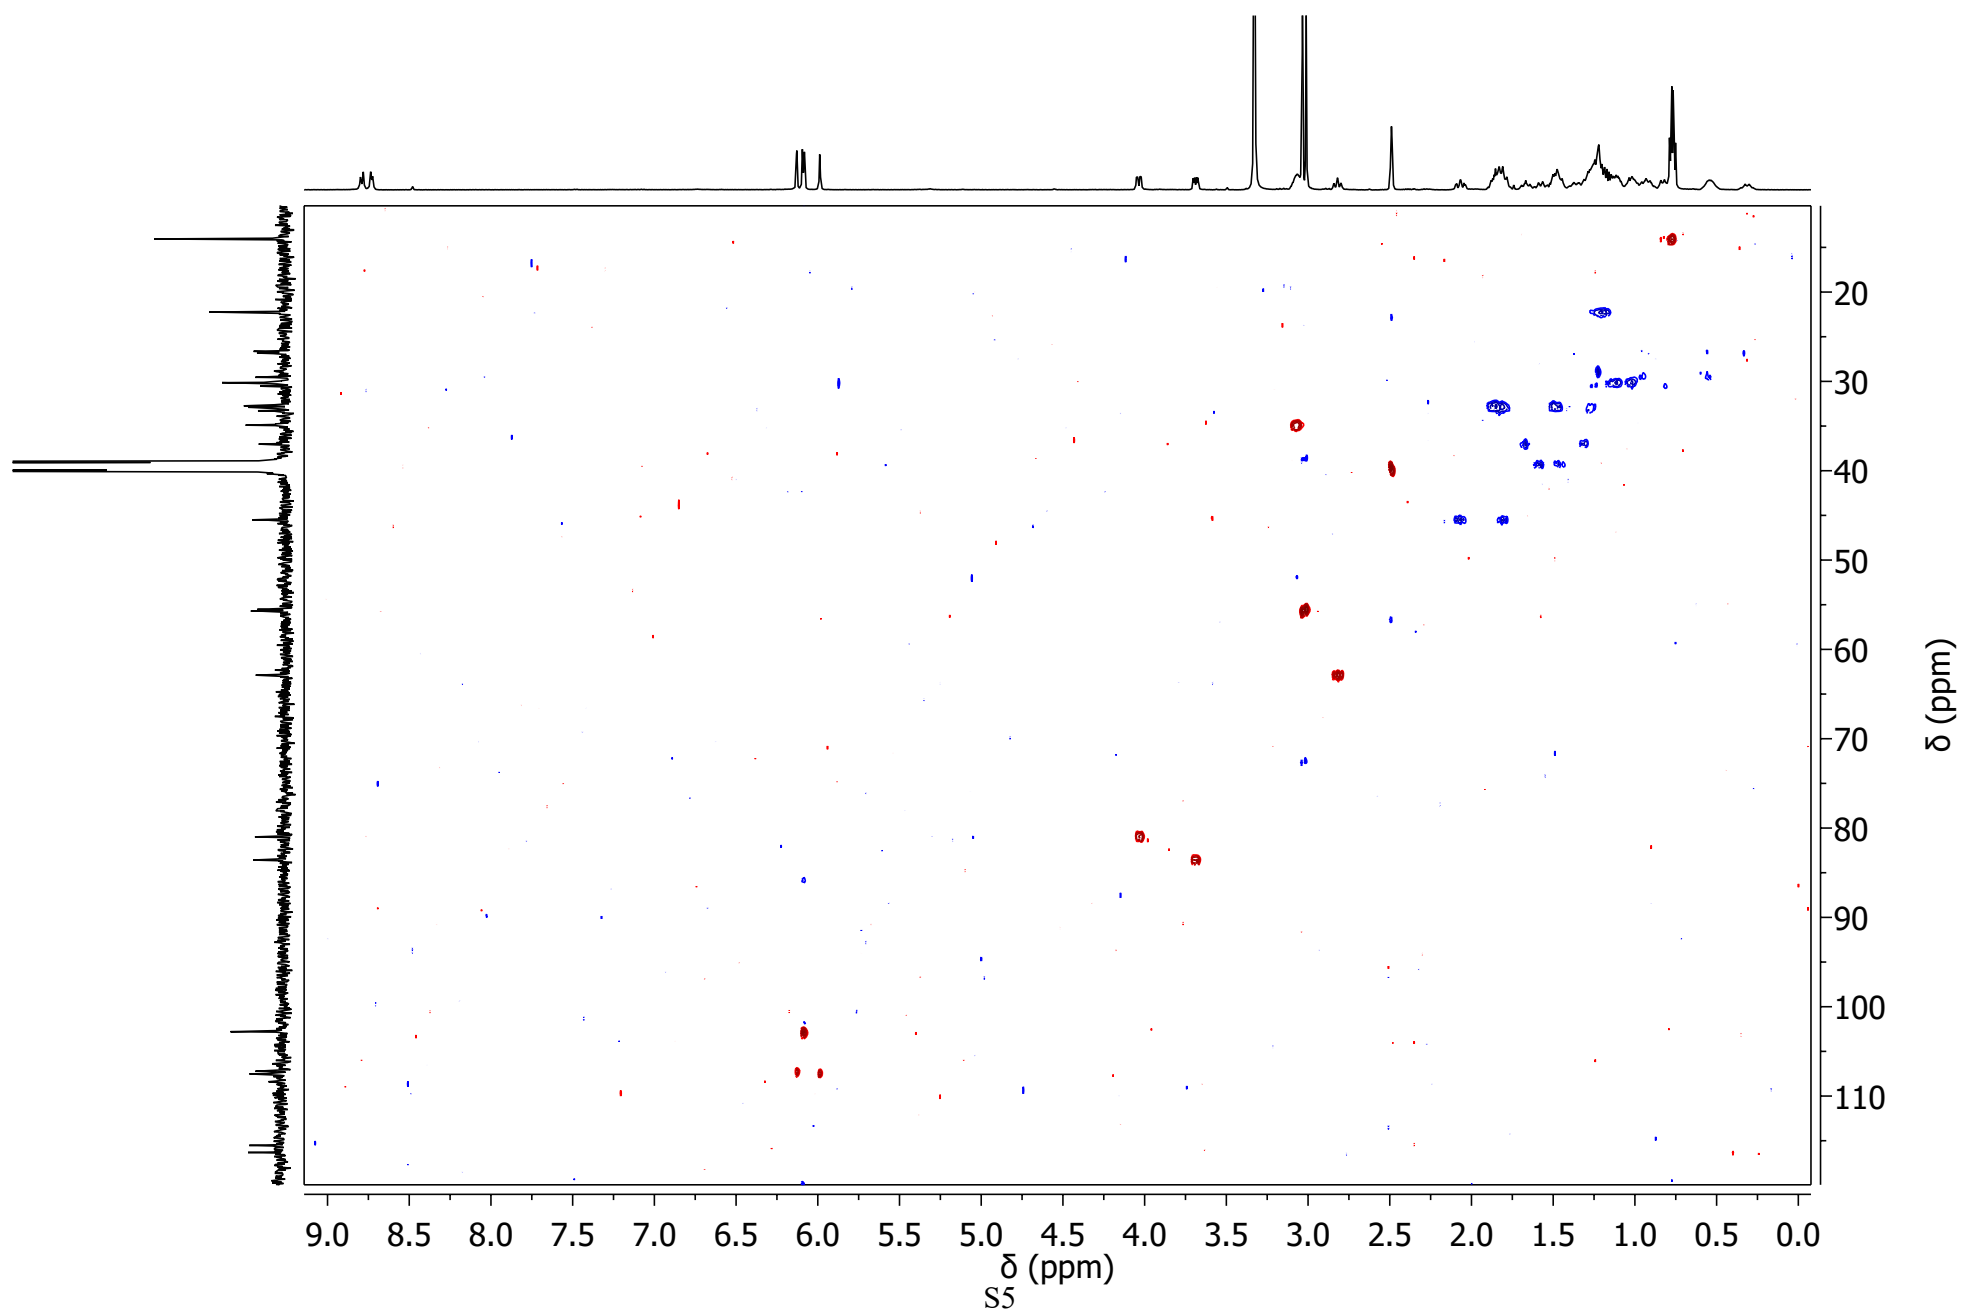

**Figure S4.** COSY NMR Spectrum (500 MHz) of **1** in DMSO<sub>6</sub>

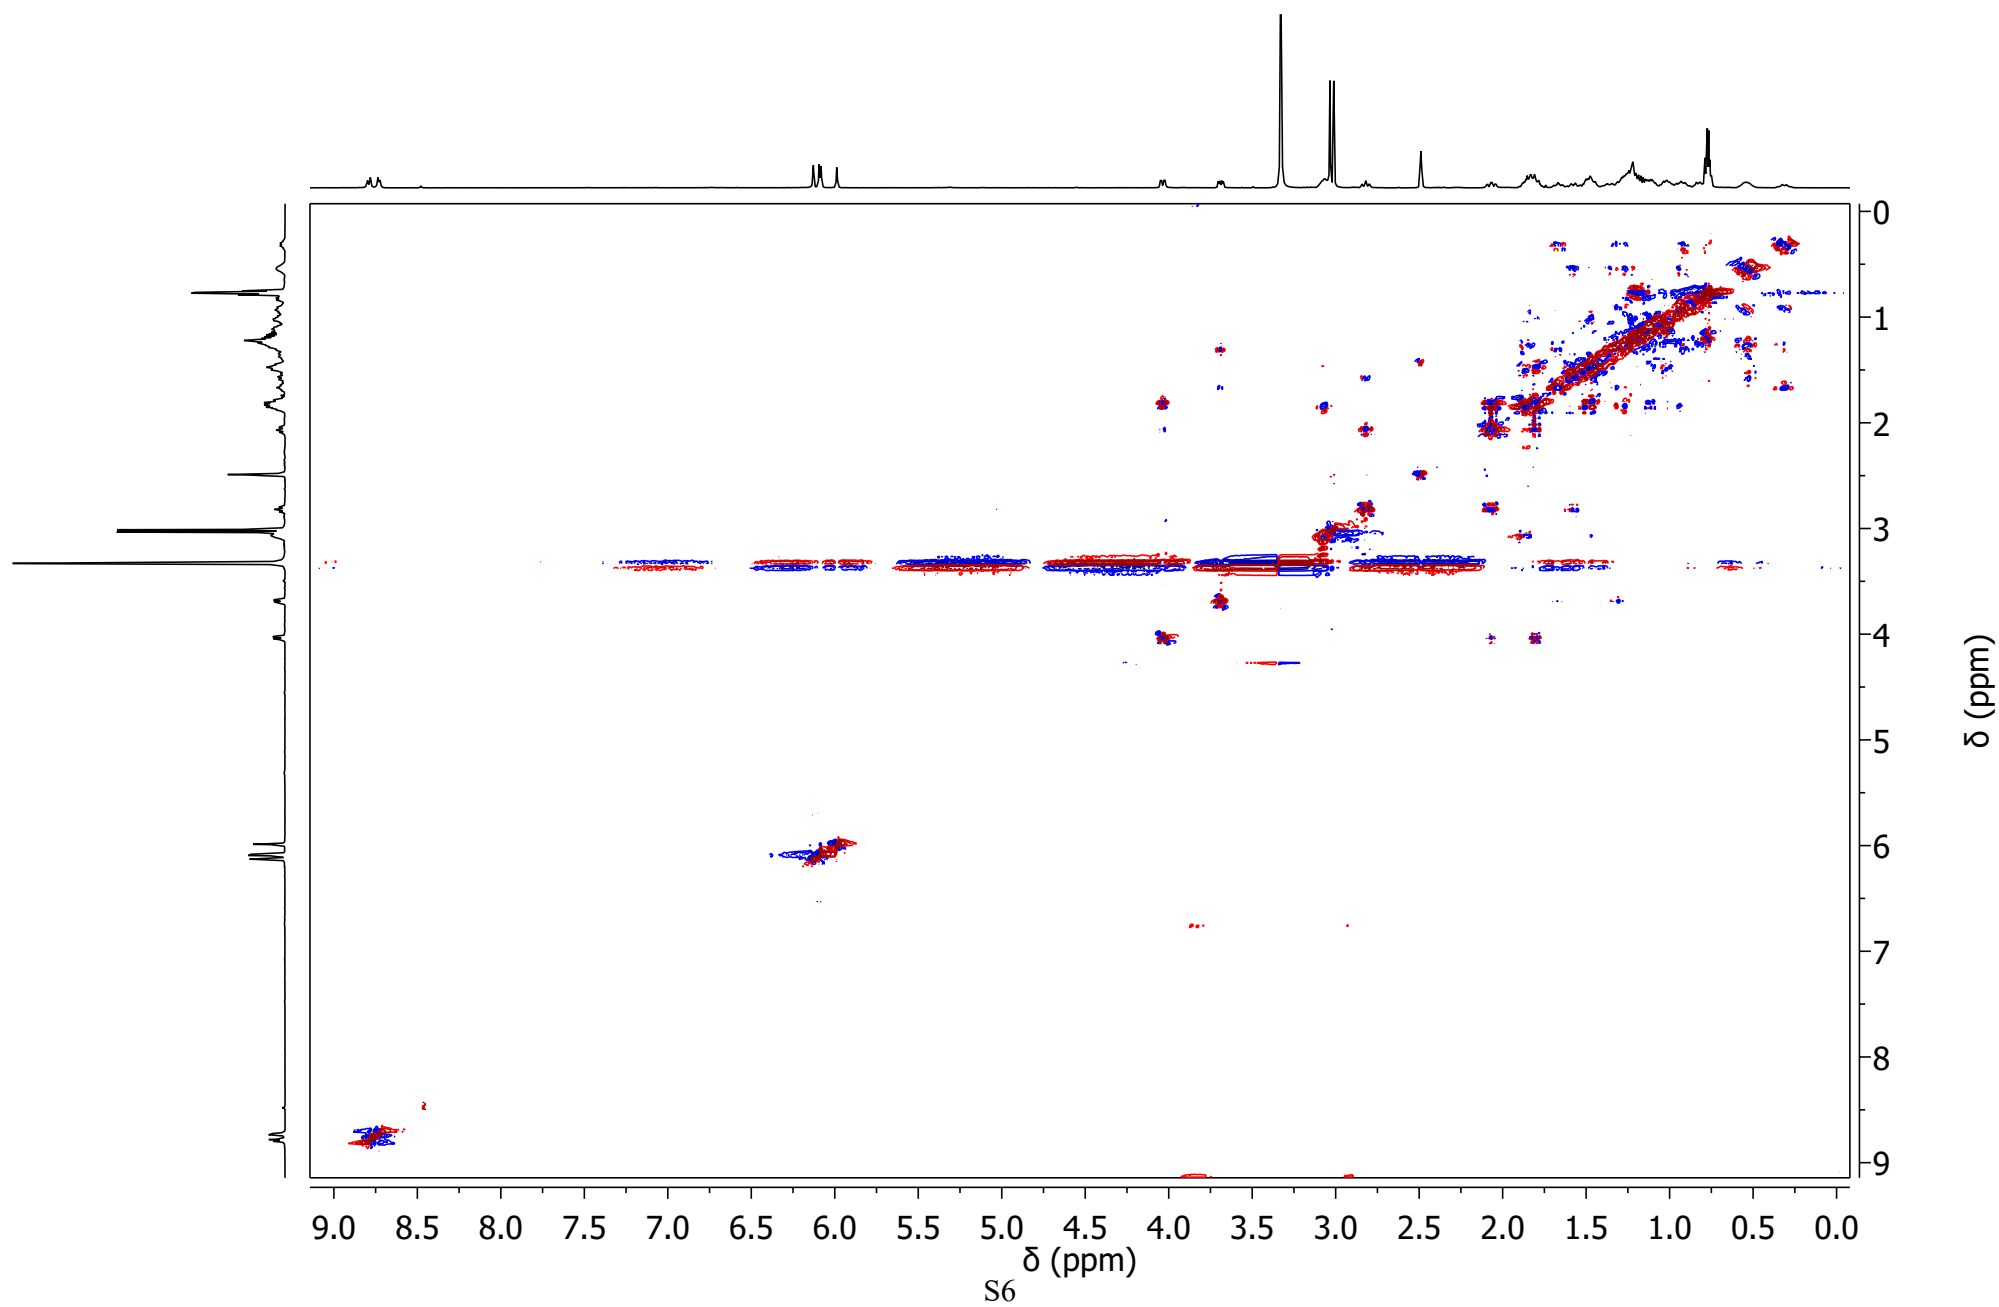

**Figure S5.** HMBC Spectrum (500 MHz) of **1** in DMSO<sub>6</sub>

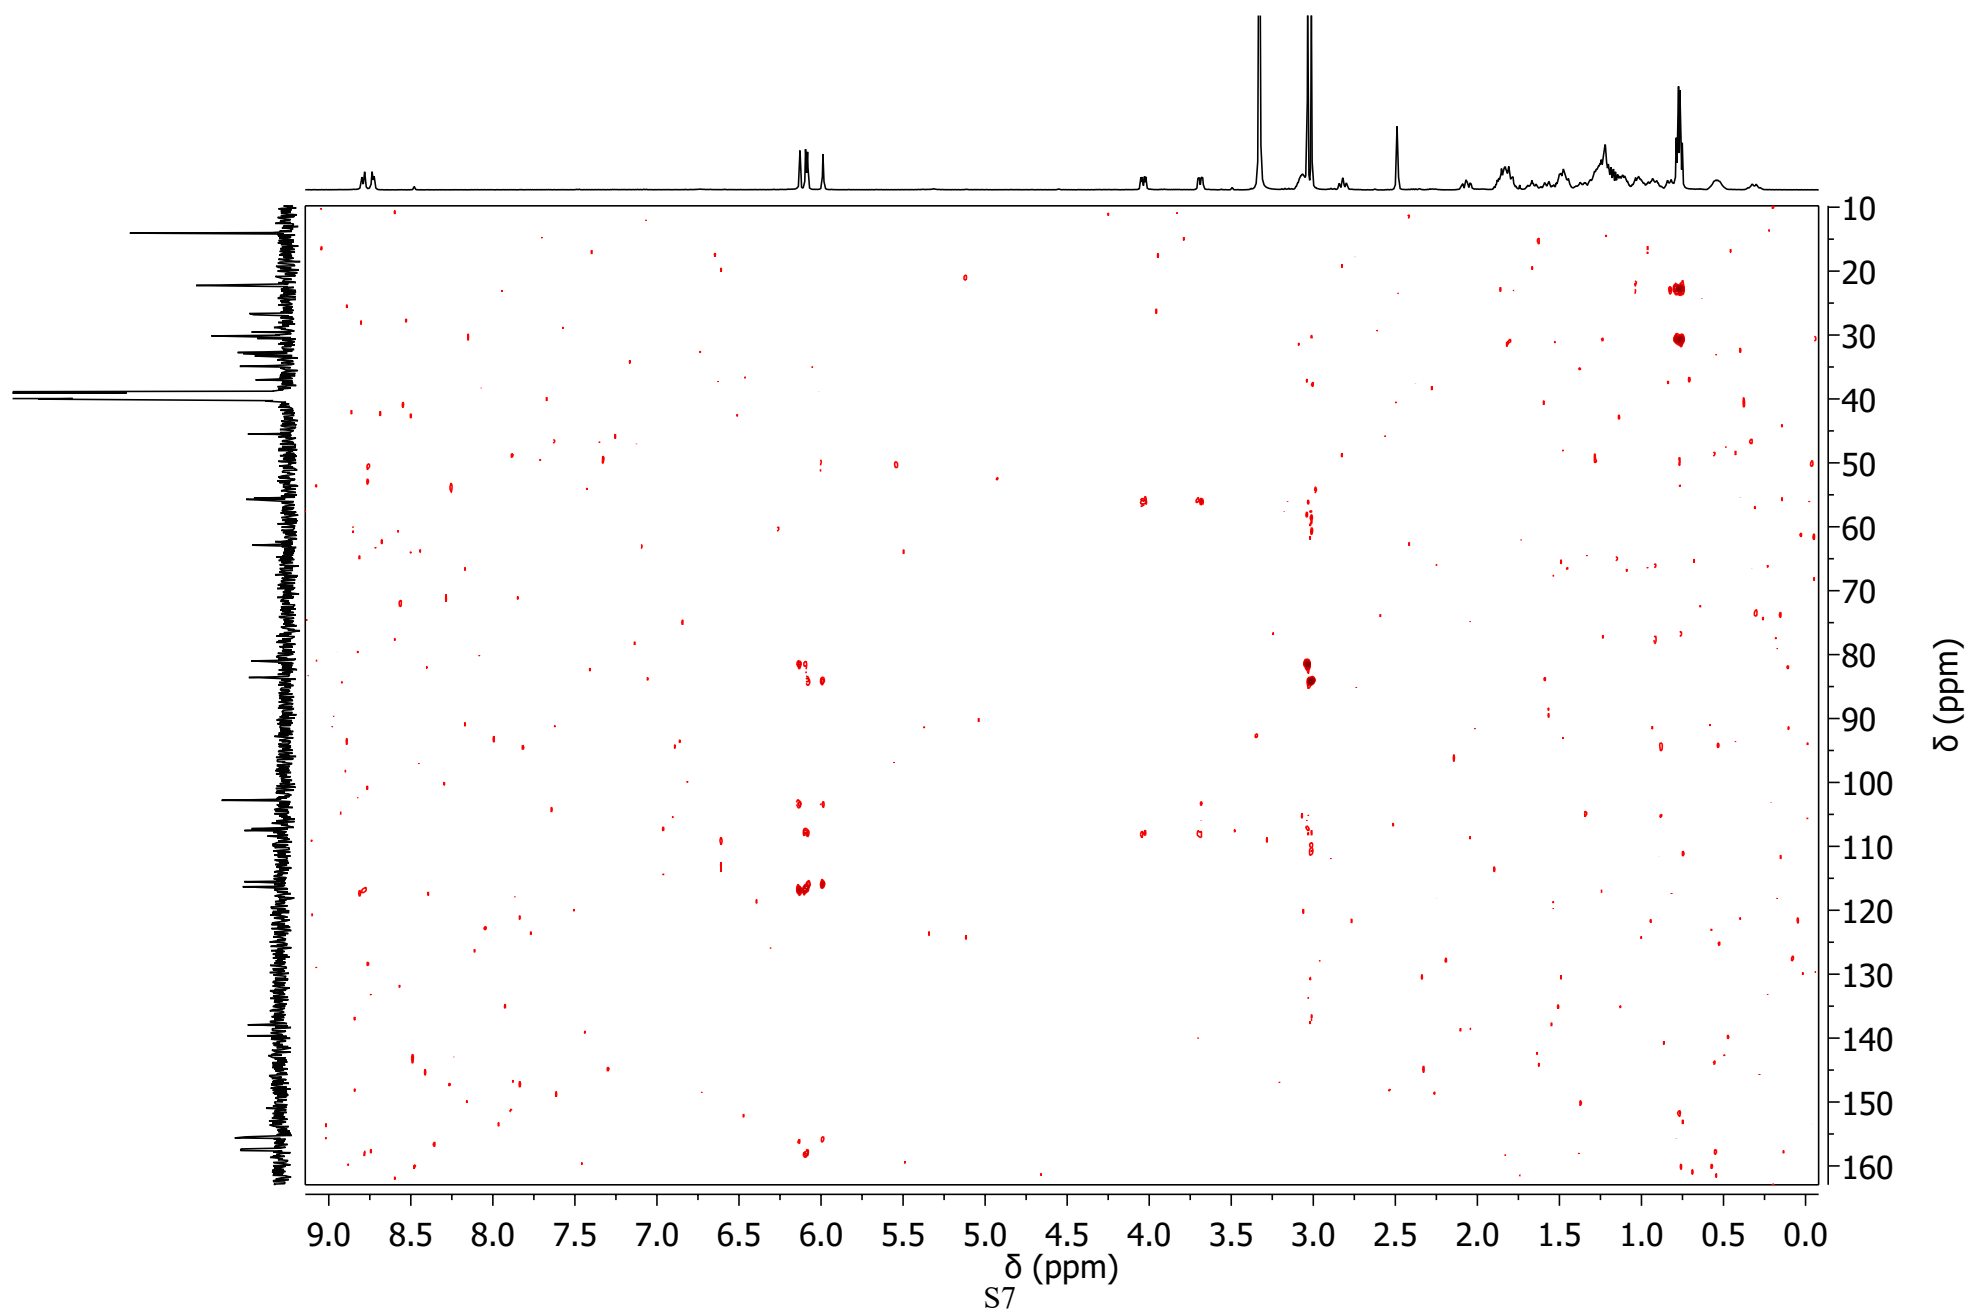

**Figure S6.**  $^1\text{H}$  NMR Spectrum (500 MHz) of **2** in  $\text{DMSO}_6$

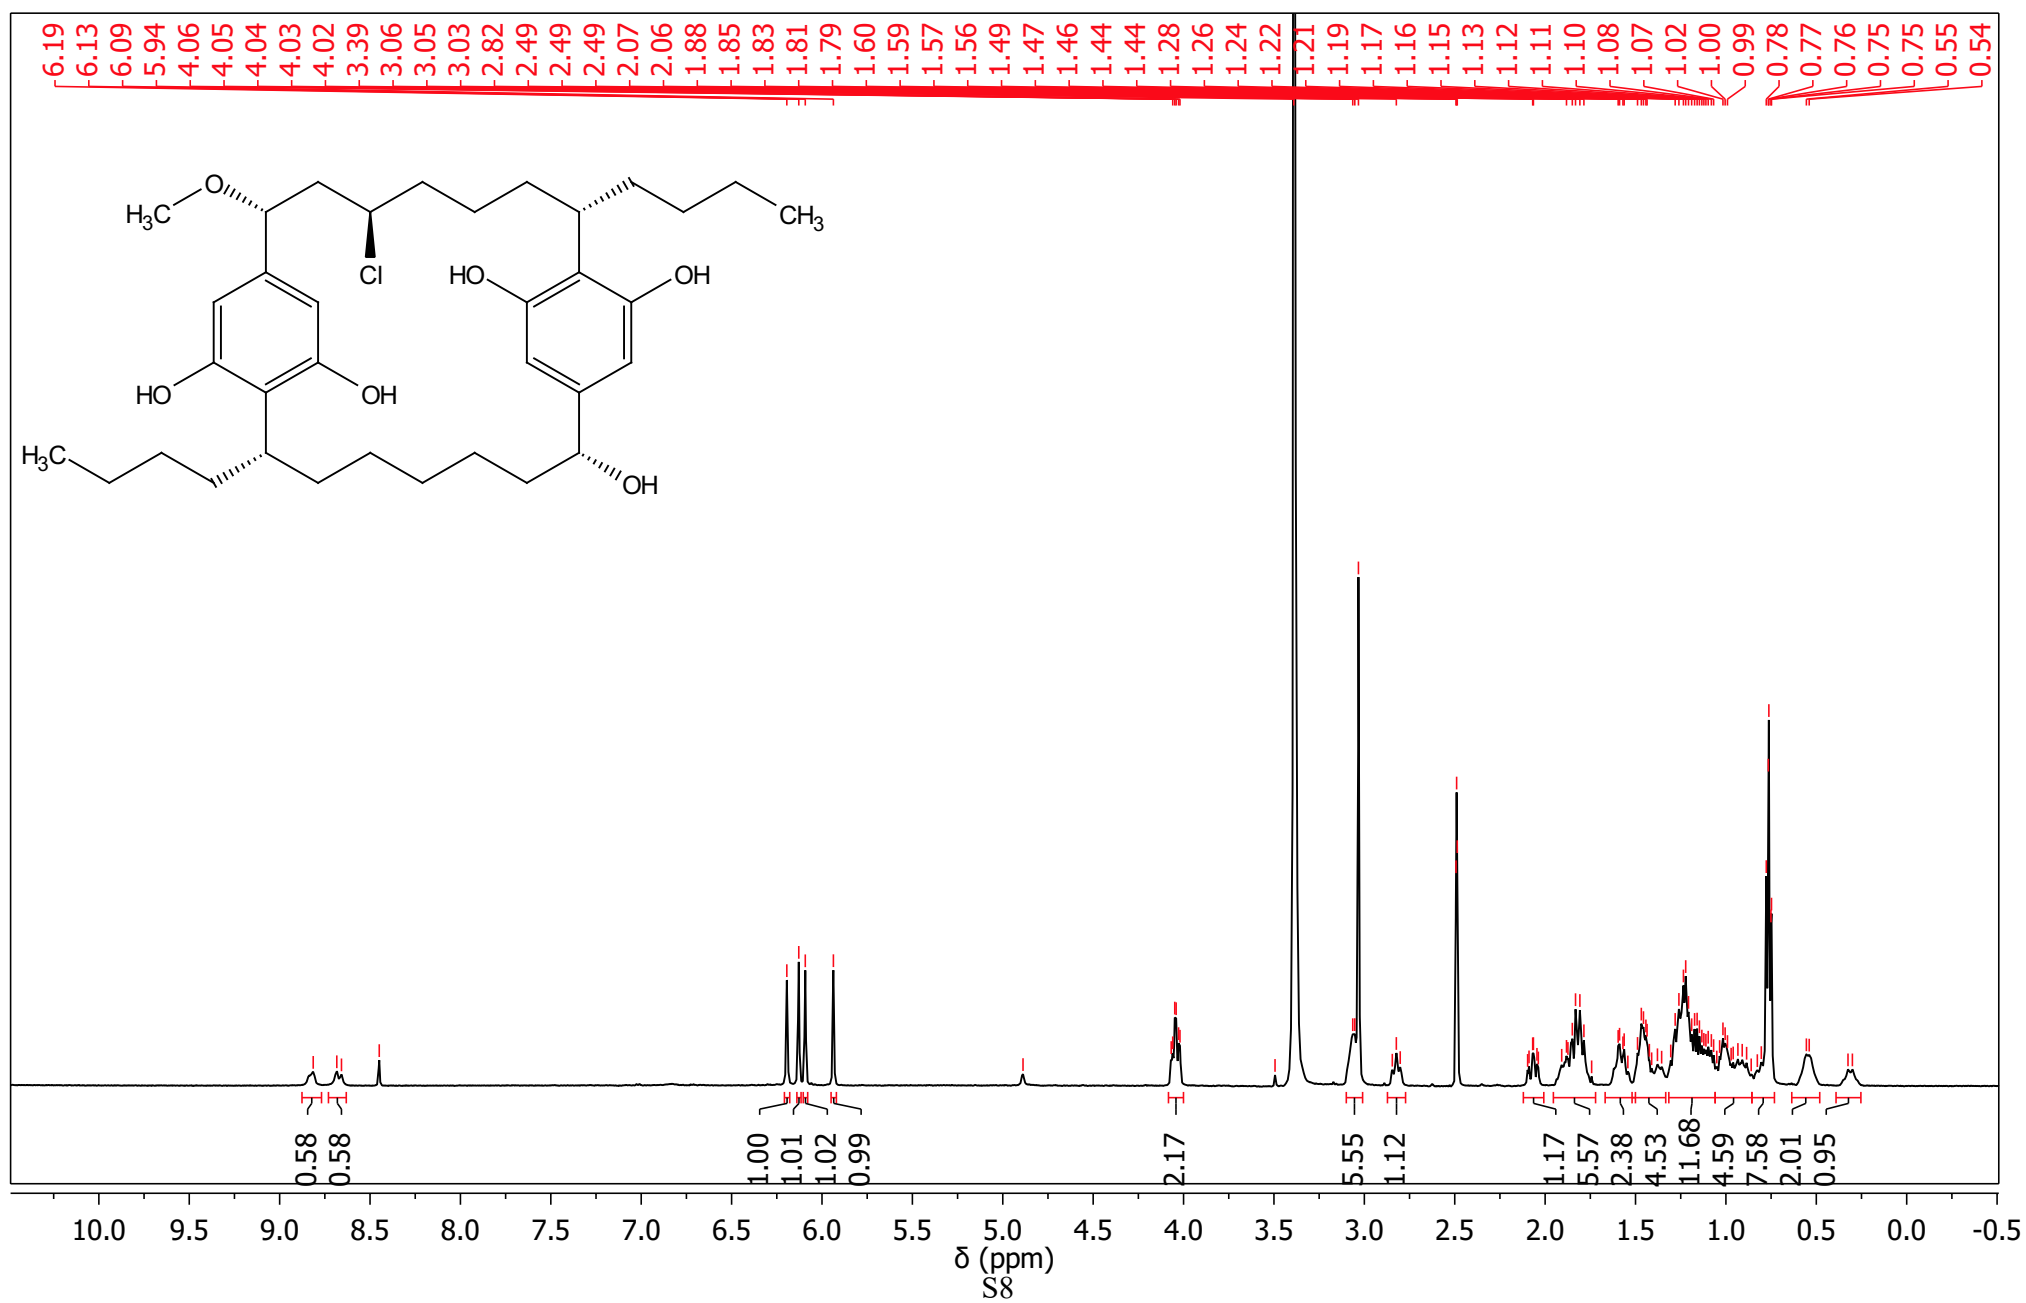



**Figure S7.**  $^{13}\text{C}$  NMR Spectrum (125 MHz) of **2** in  $\text{DMSO}_6$

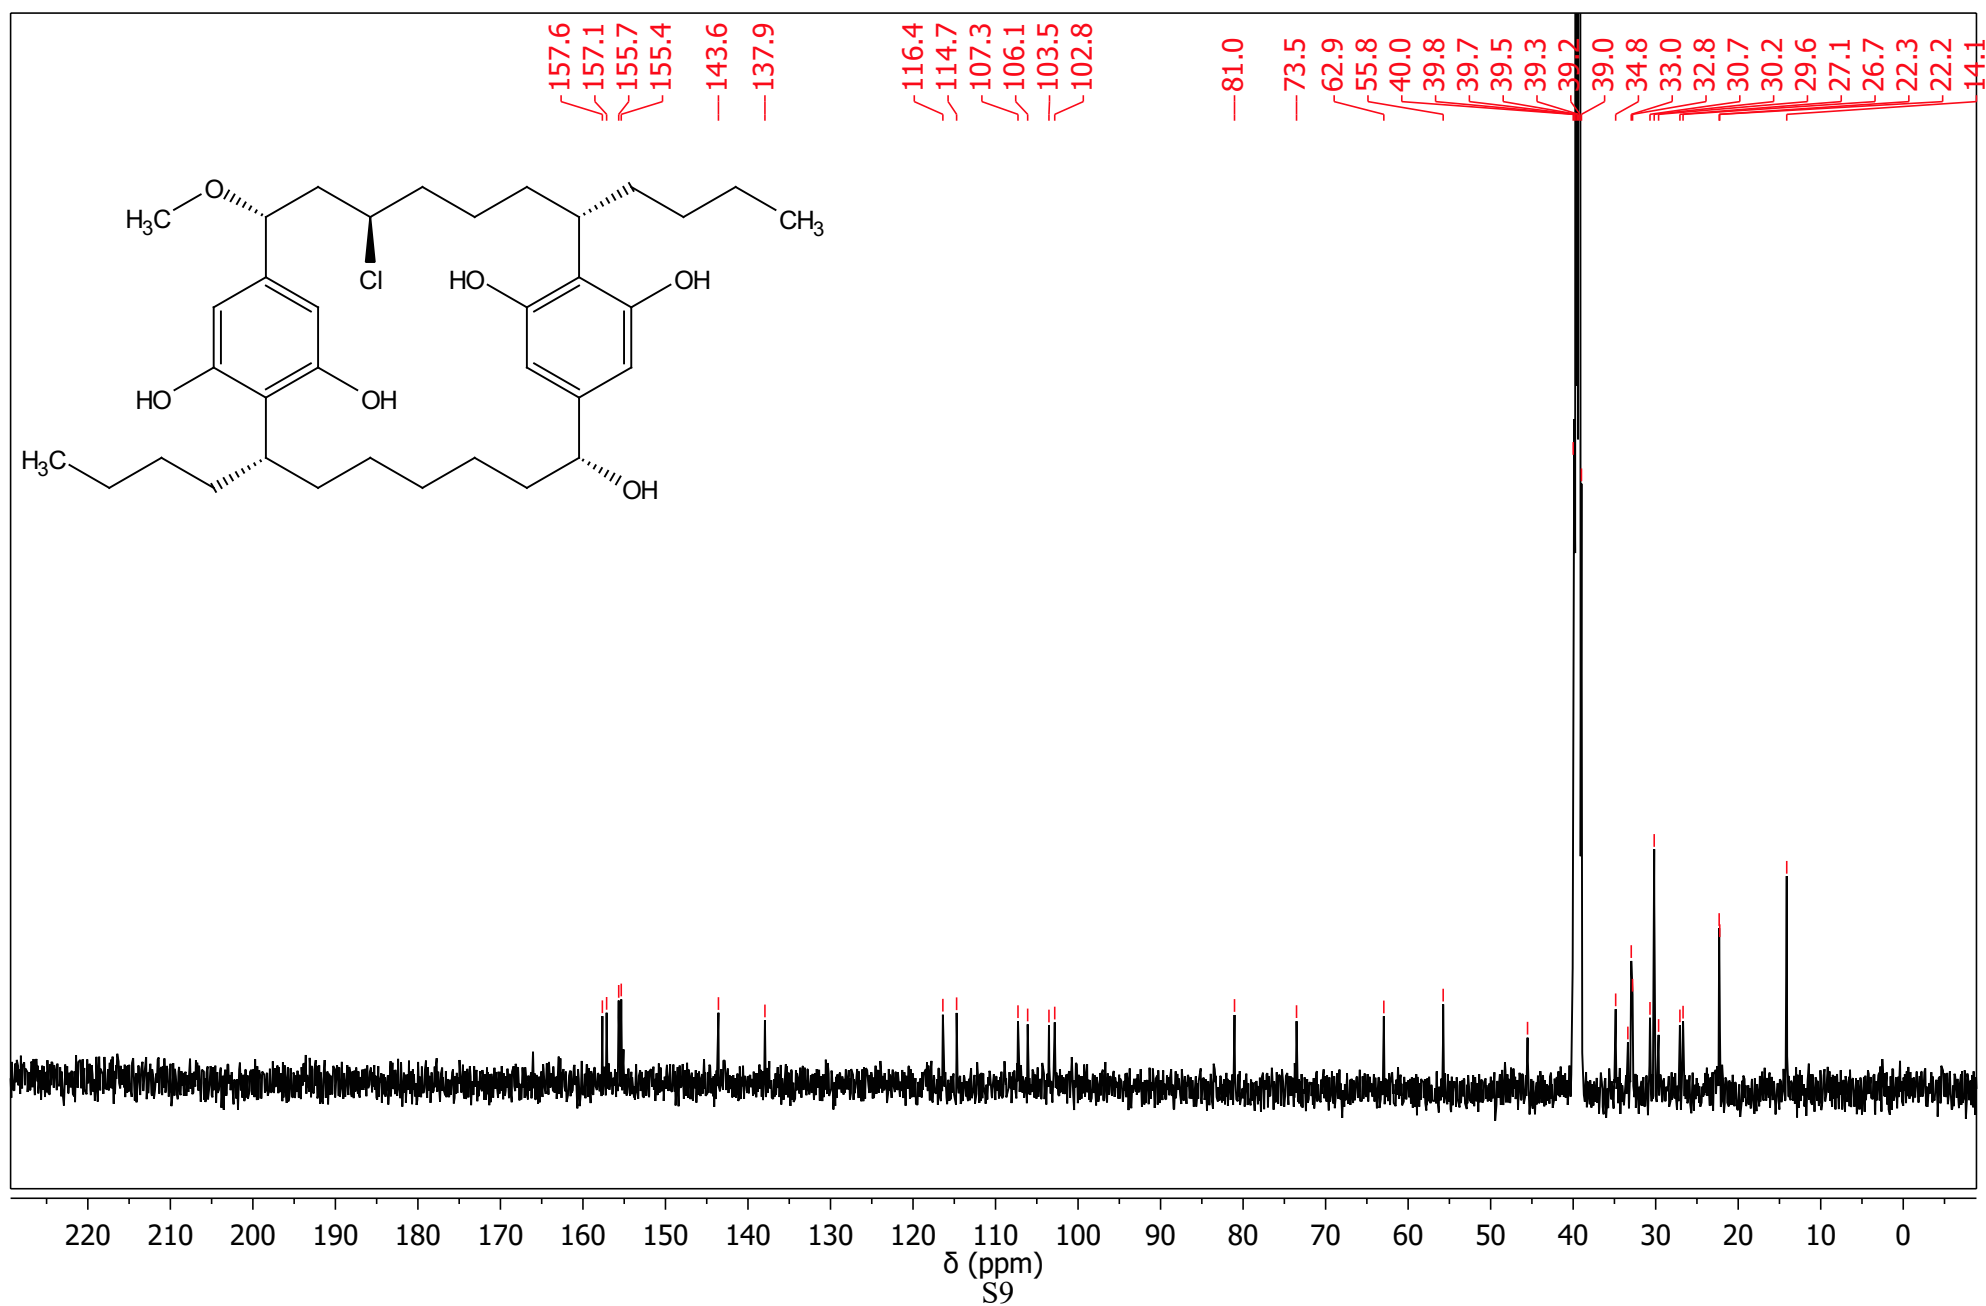

**Figure S8.** HSQC NMR Spectrum (500 MHz) of **2** in DMSO<sub>6</sub>

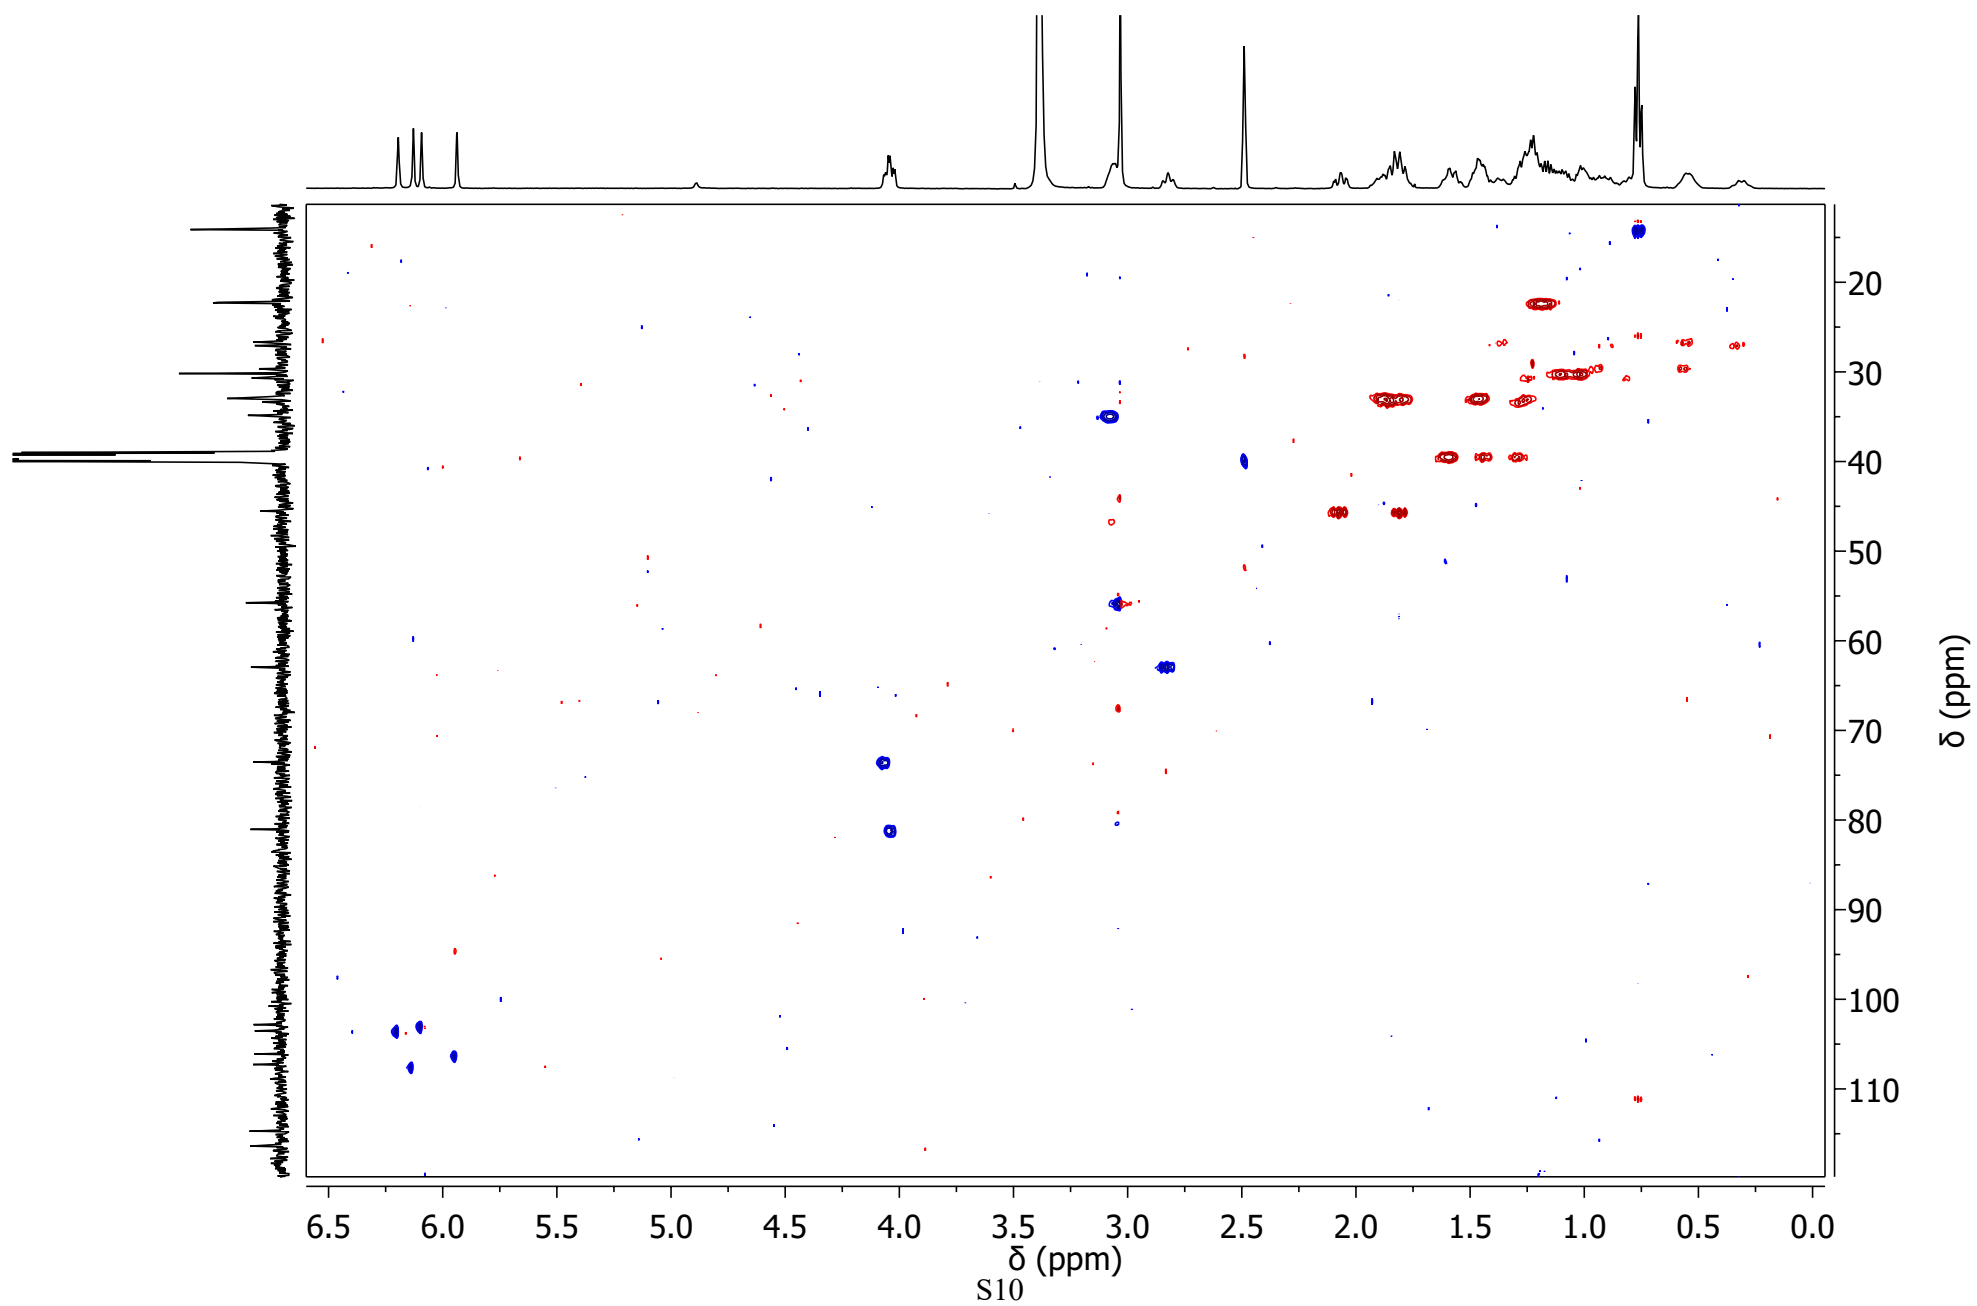

**Figure S9.** COSY NMR Spectrum (500 MHz) of **2** in DMSO<sub>6</sub>

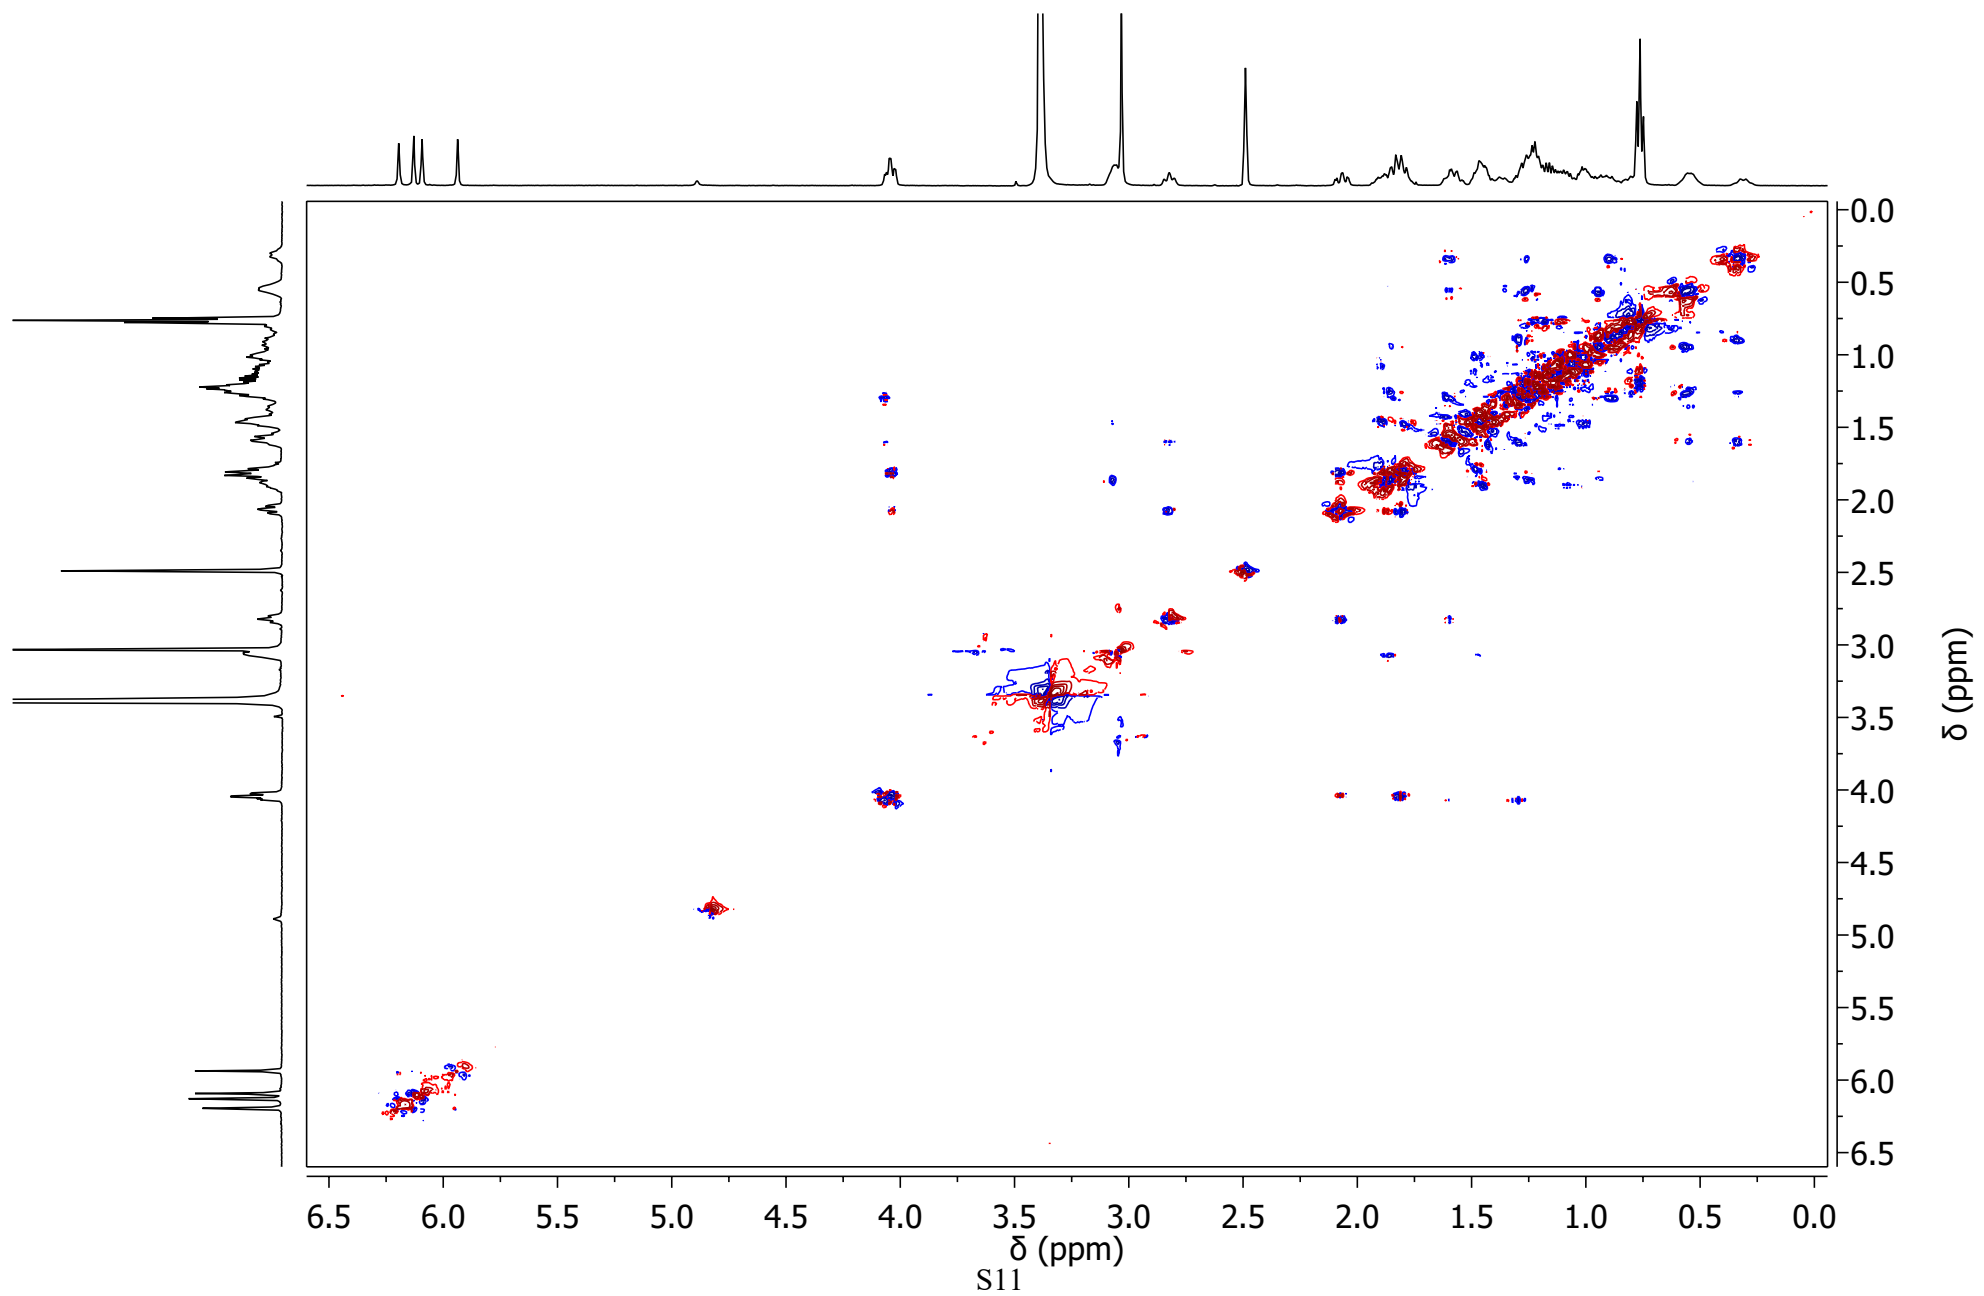

**Figure S10.** HMBC Spectrum (500 MHz) of **2** in DMSO<sub>6</sub>

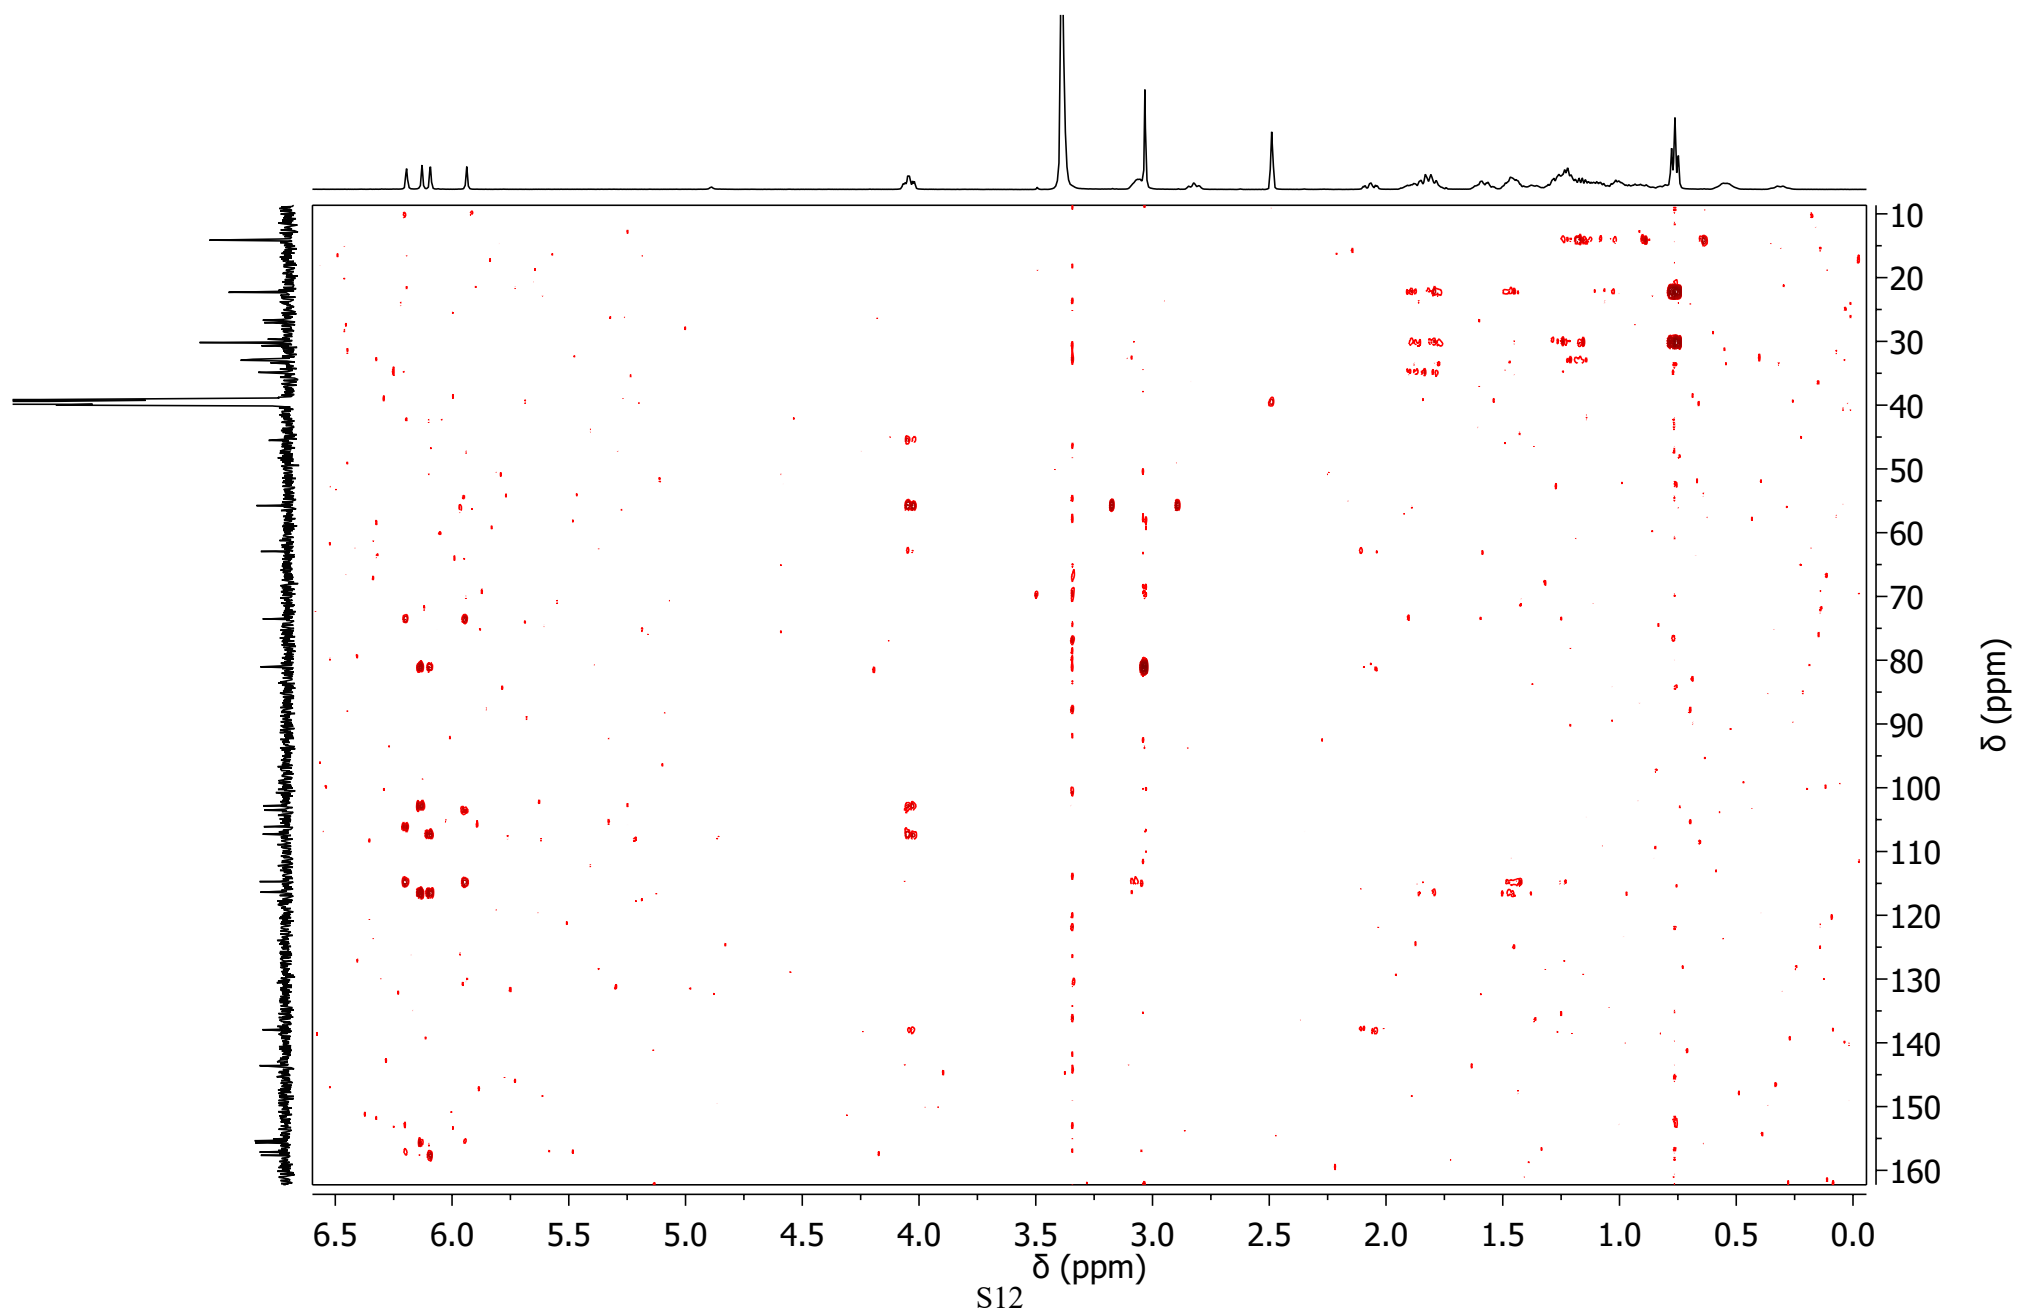

**Figure S11.**  $^1\text{H}$  NMR Spectrum (500 MHz) of **3** in  $\text{DMSO}_6$

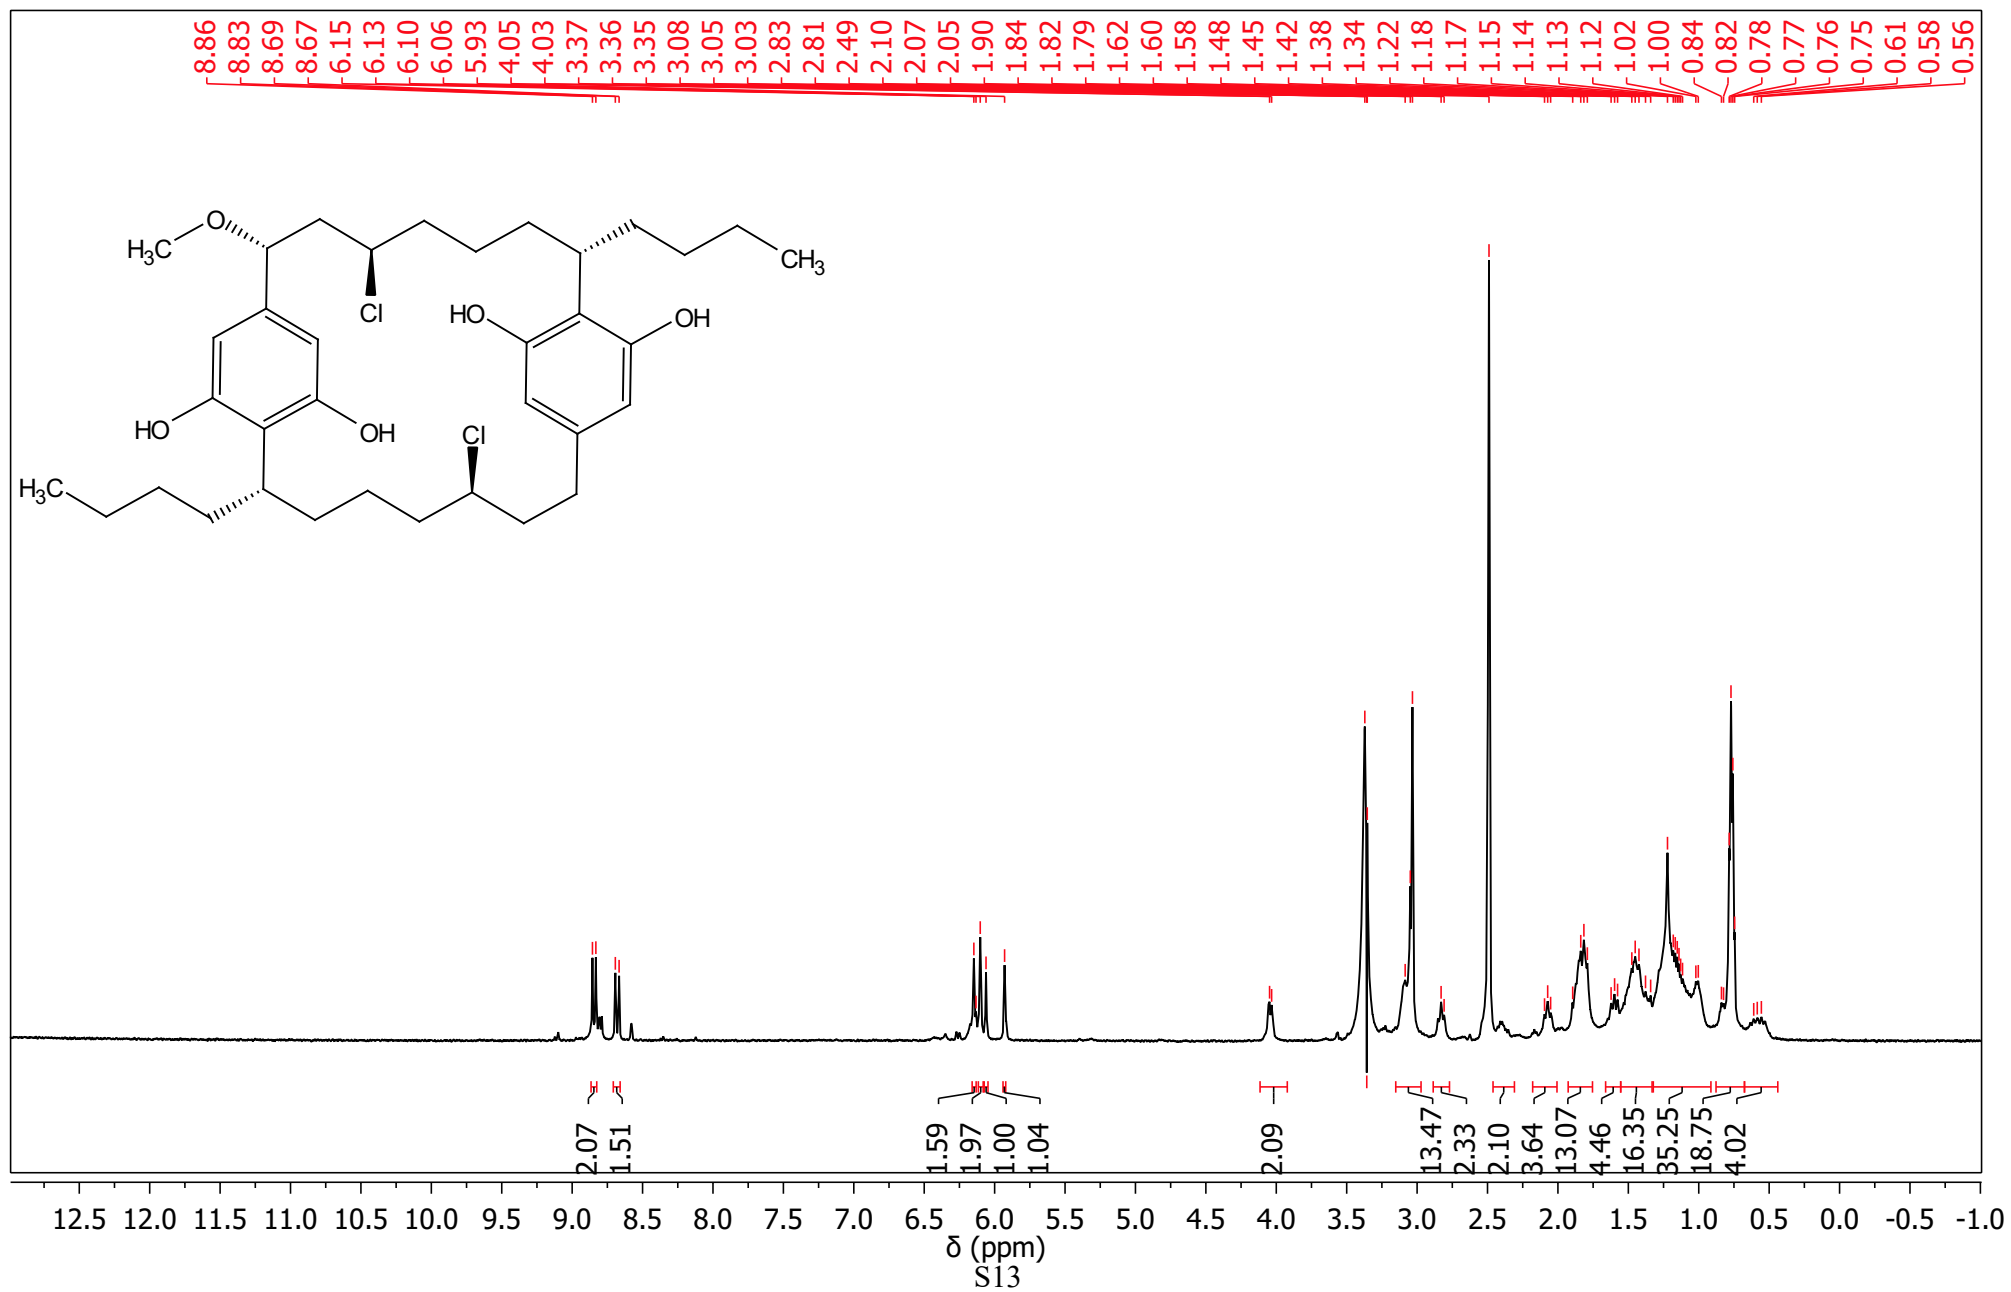

**Figure S12.**  $^{13}\text{C}$  NMR Spectrum (125 MHz) of **3** in  $\text{DMSO}_6$

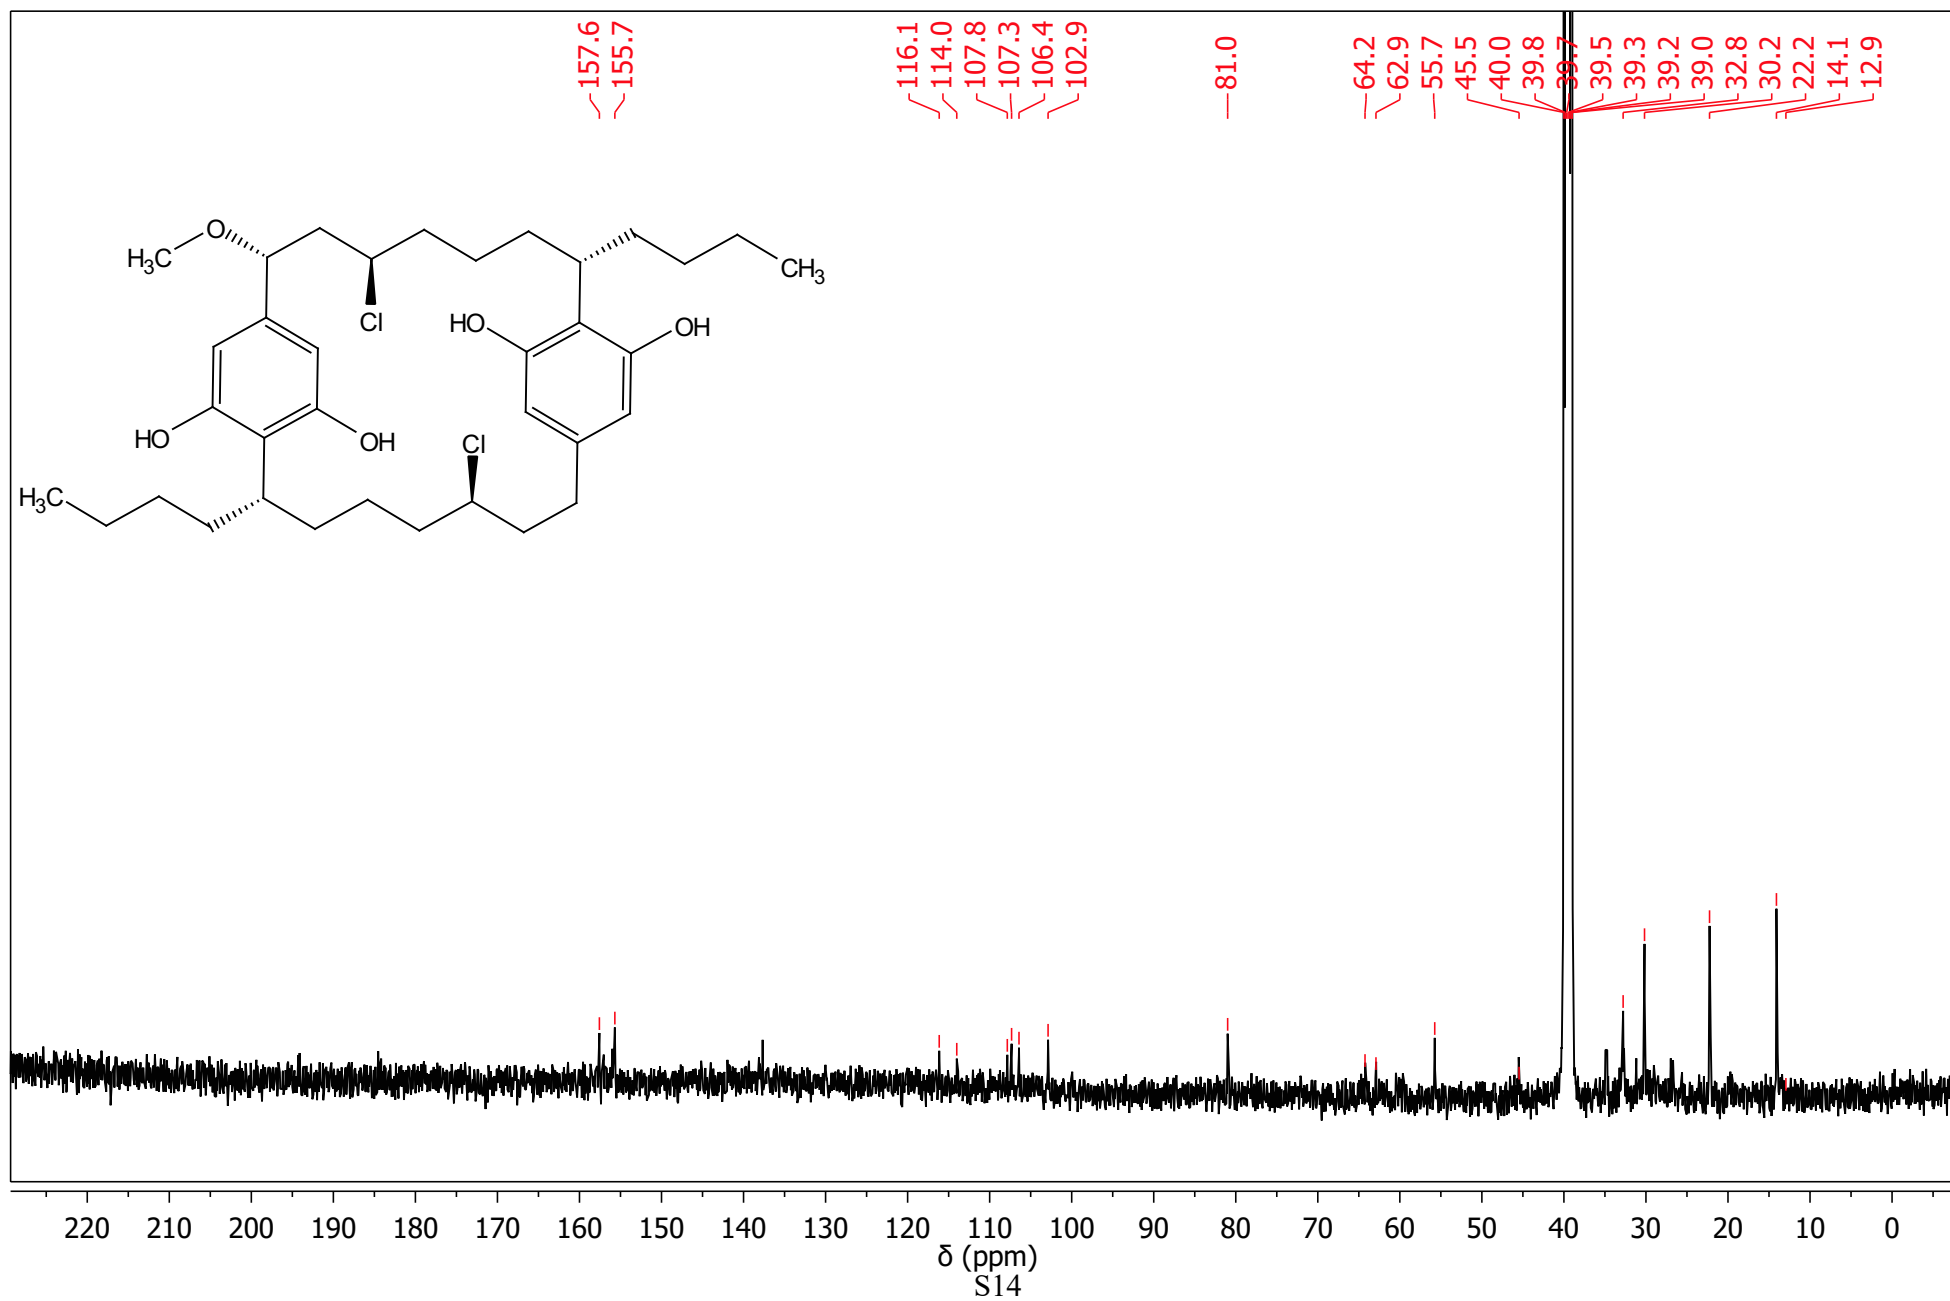

**Figure S13.**  $^1\text{H}$  NMR Spectrum (500 MHz) of **4** in  $\text{DMSO}_6$

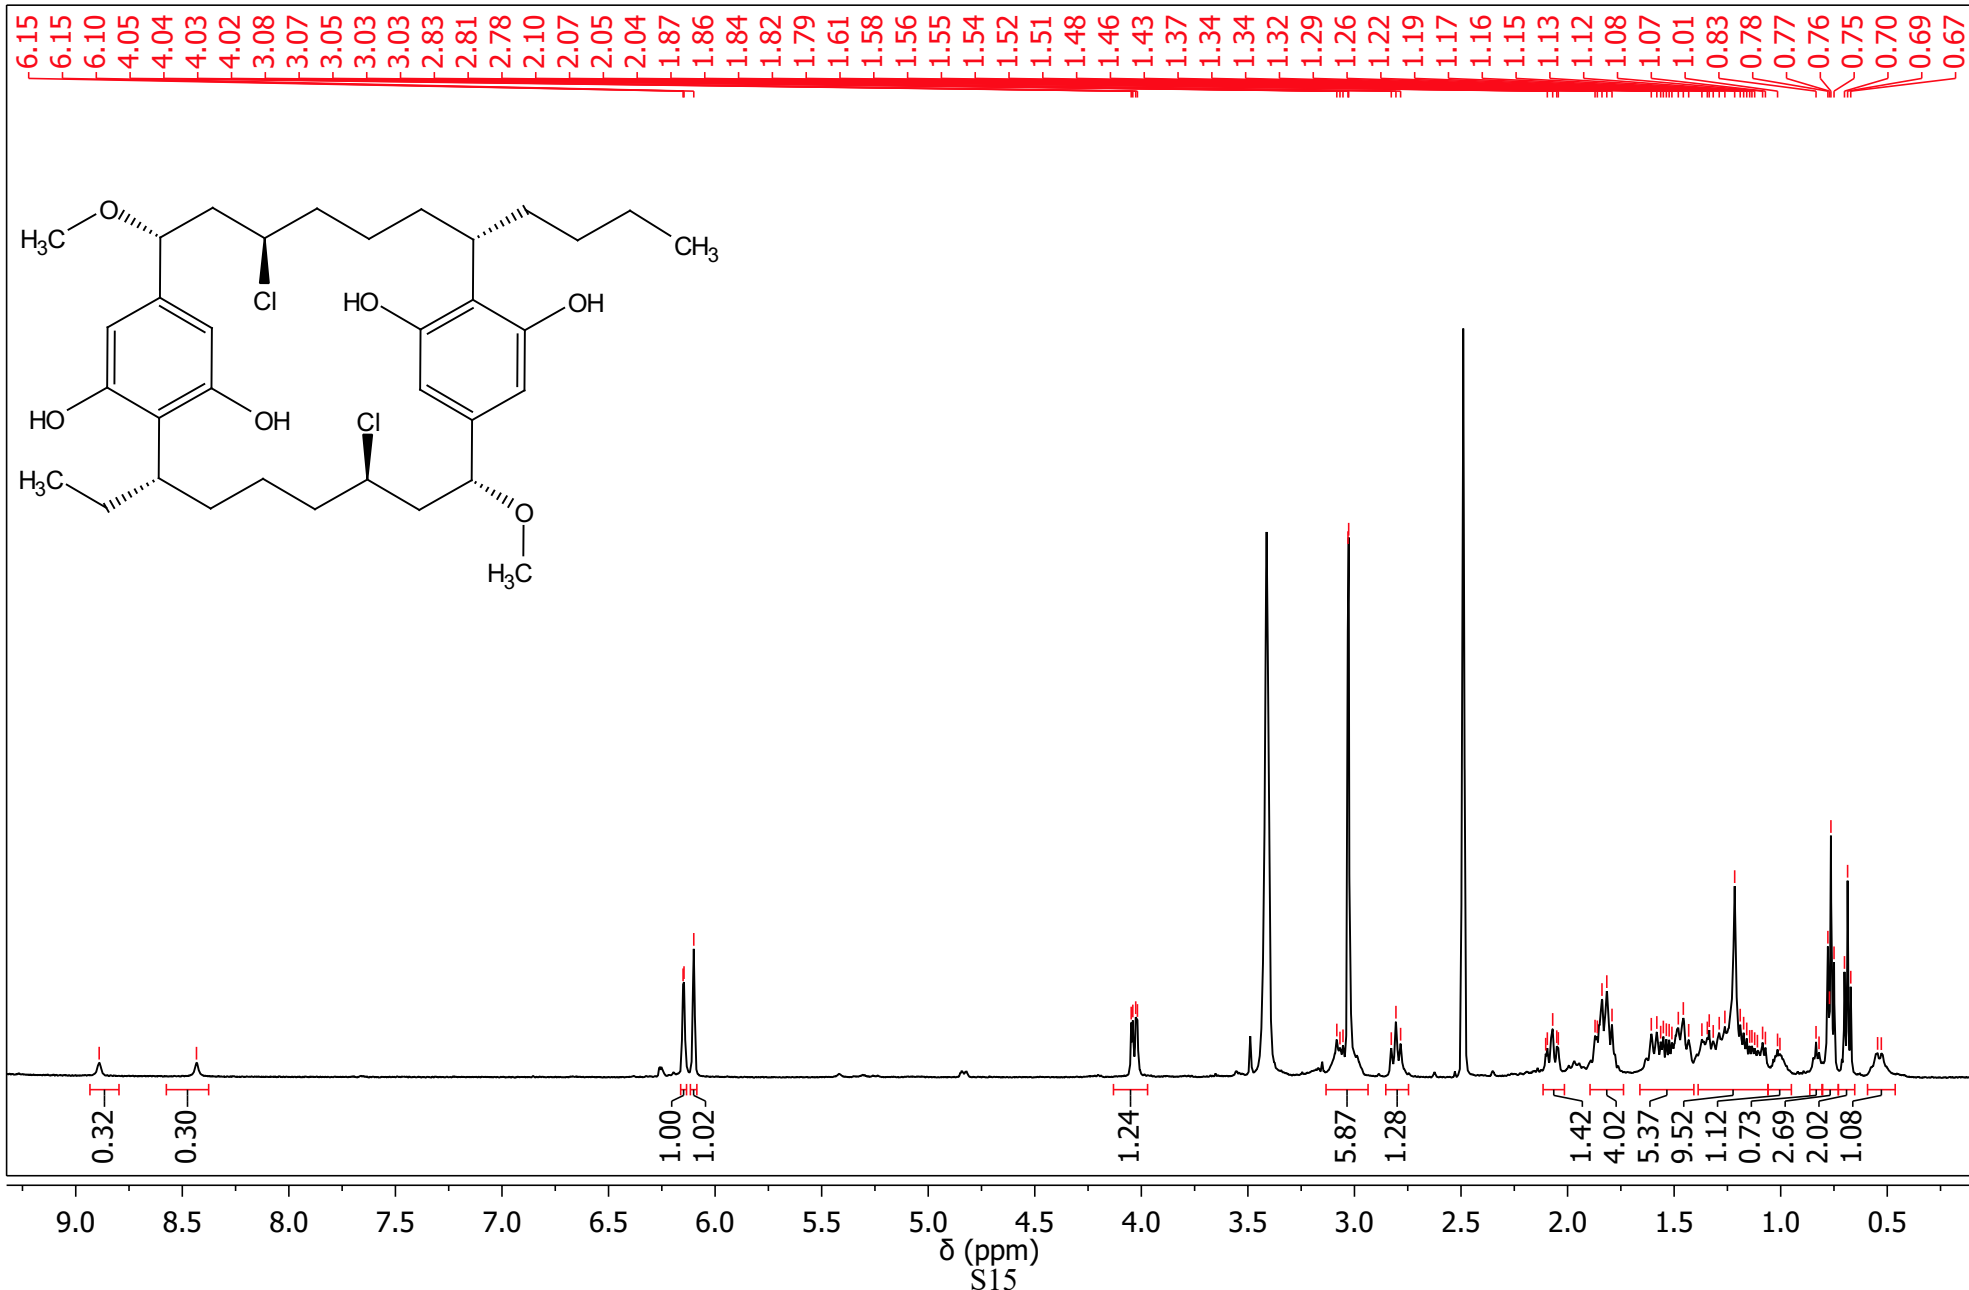

**Figure S14.**  $^{13}\text{C}$  NMR Spectrum (125 MHz) of **4** in  $\text{DMSO}_6$

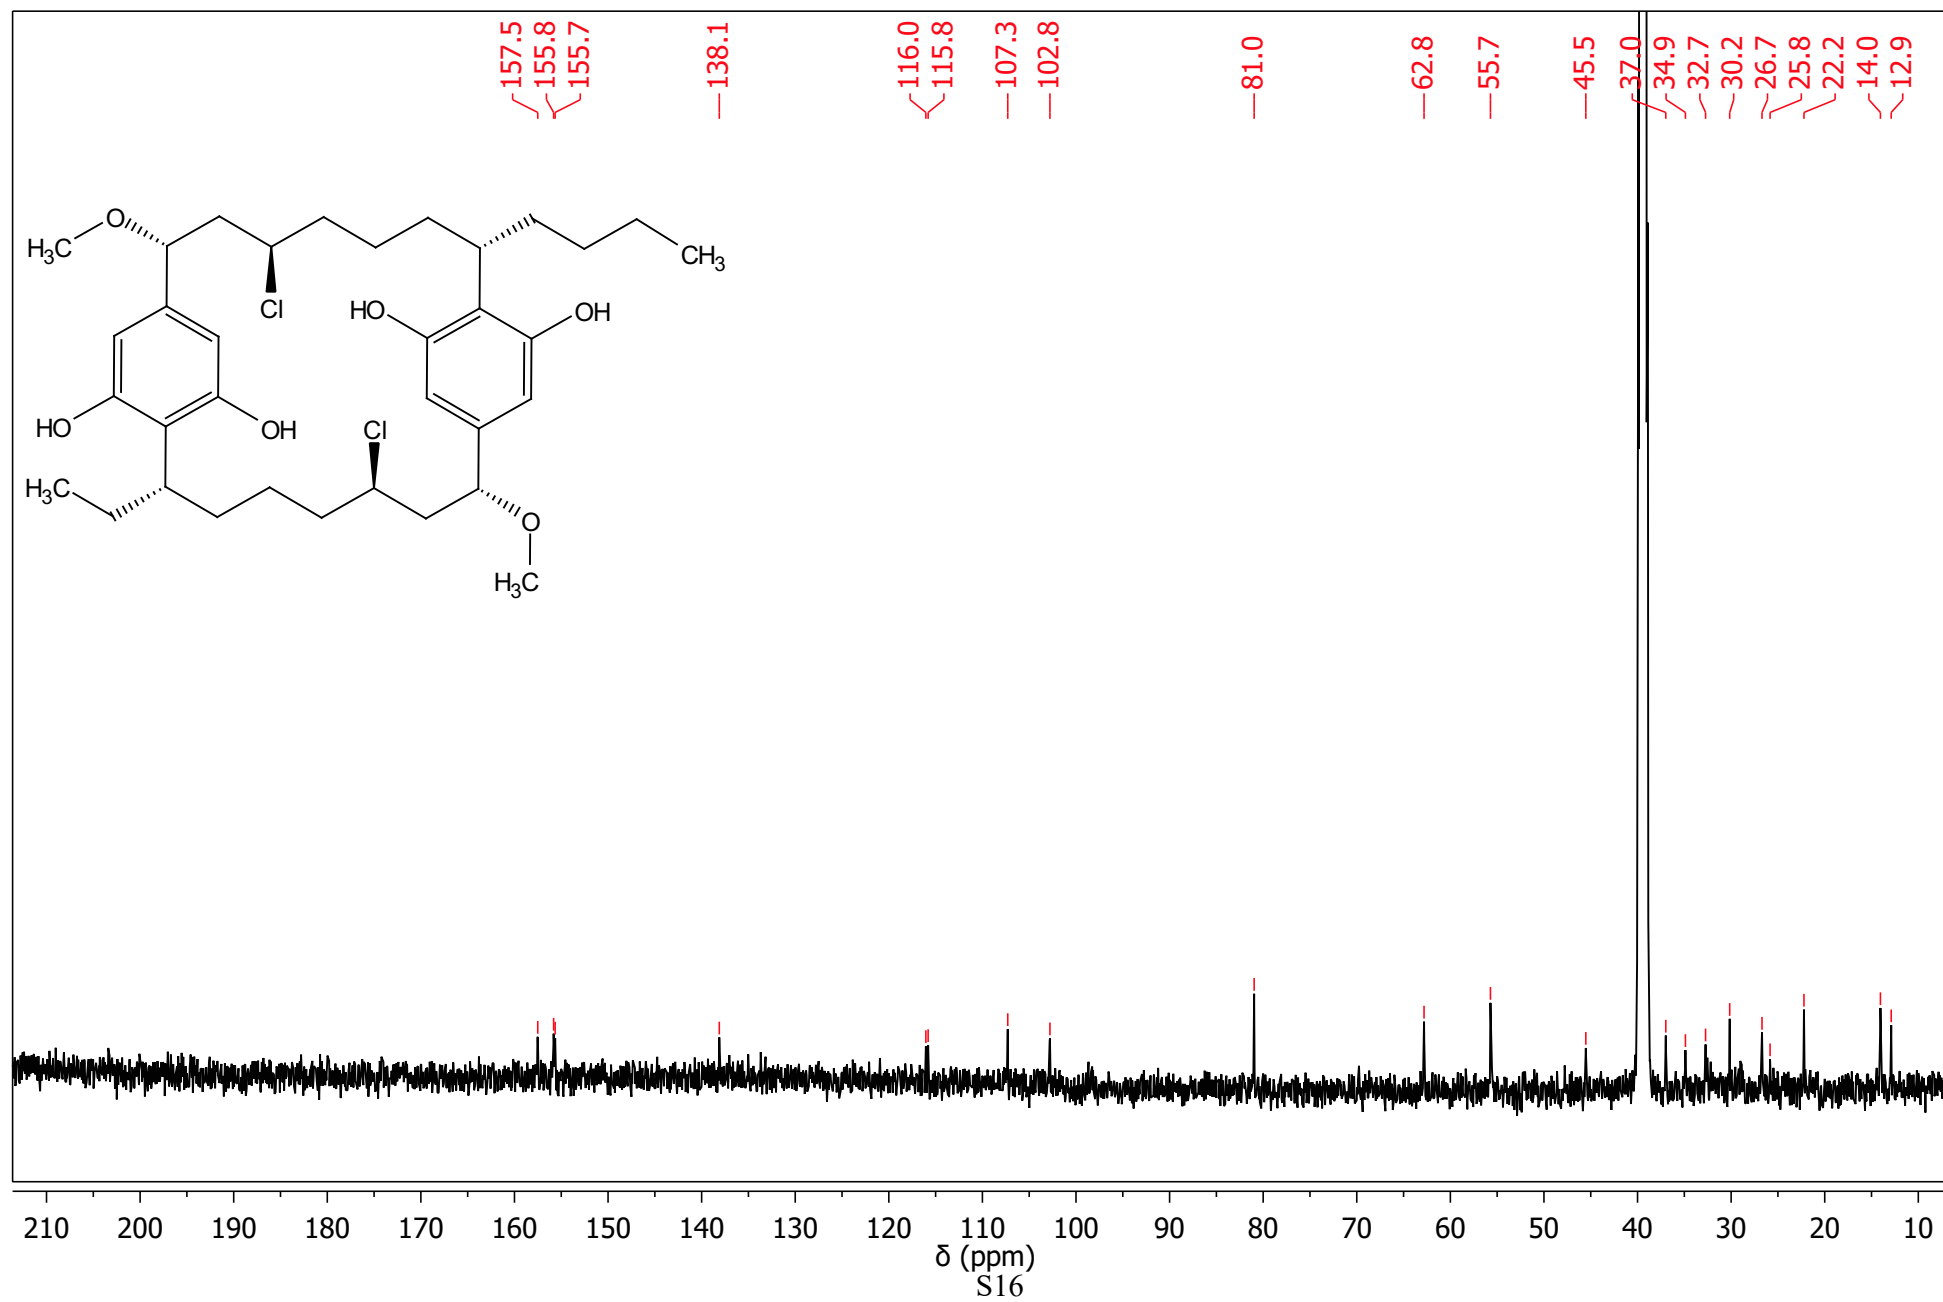



**Figure S15.** HSQC NMR Spectrum (500 MHz) of **4** in DMSO<sub>6</sub>

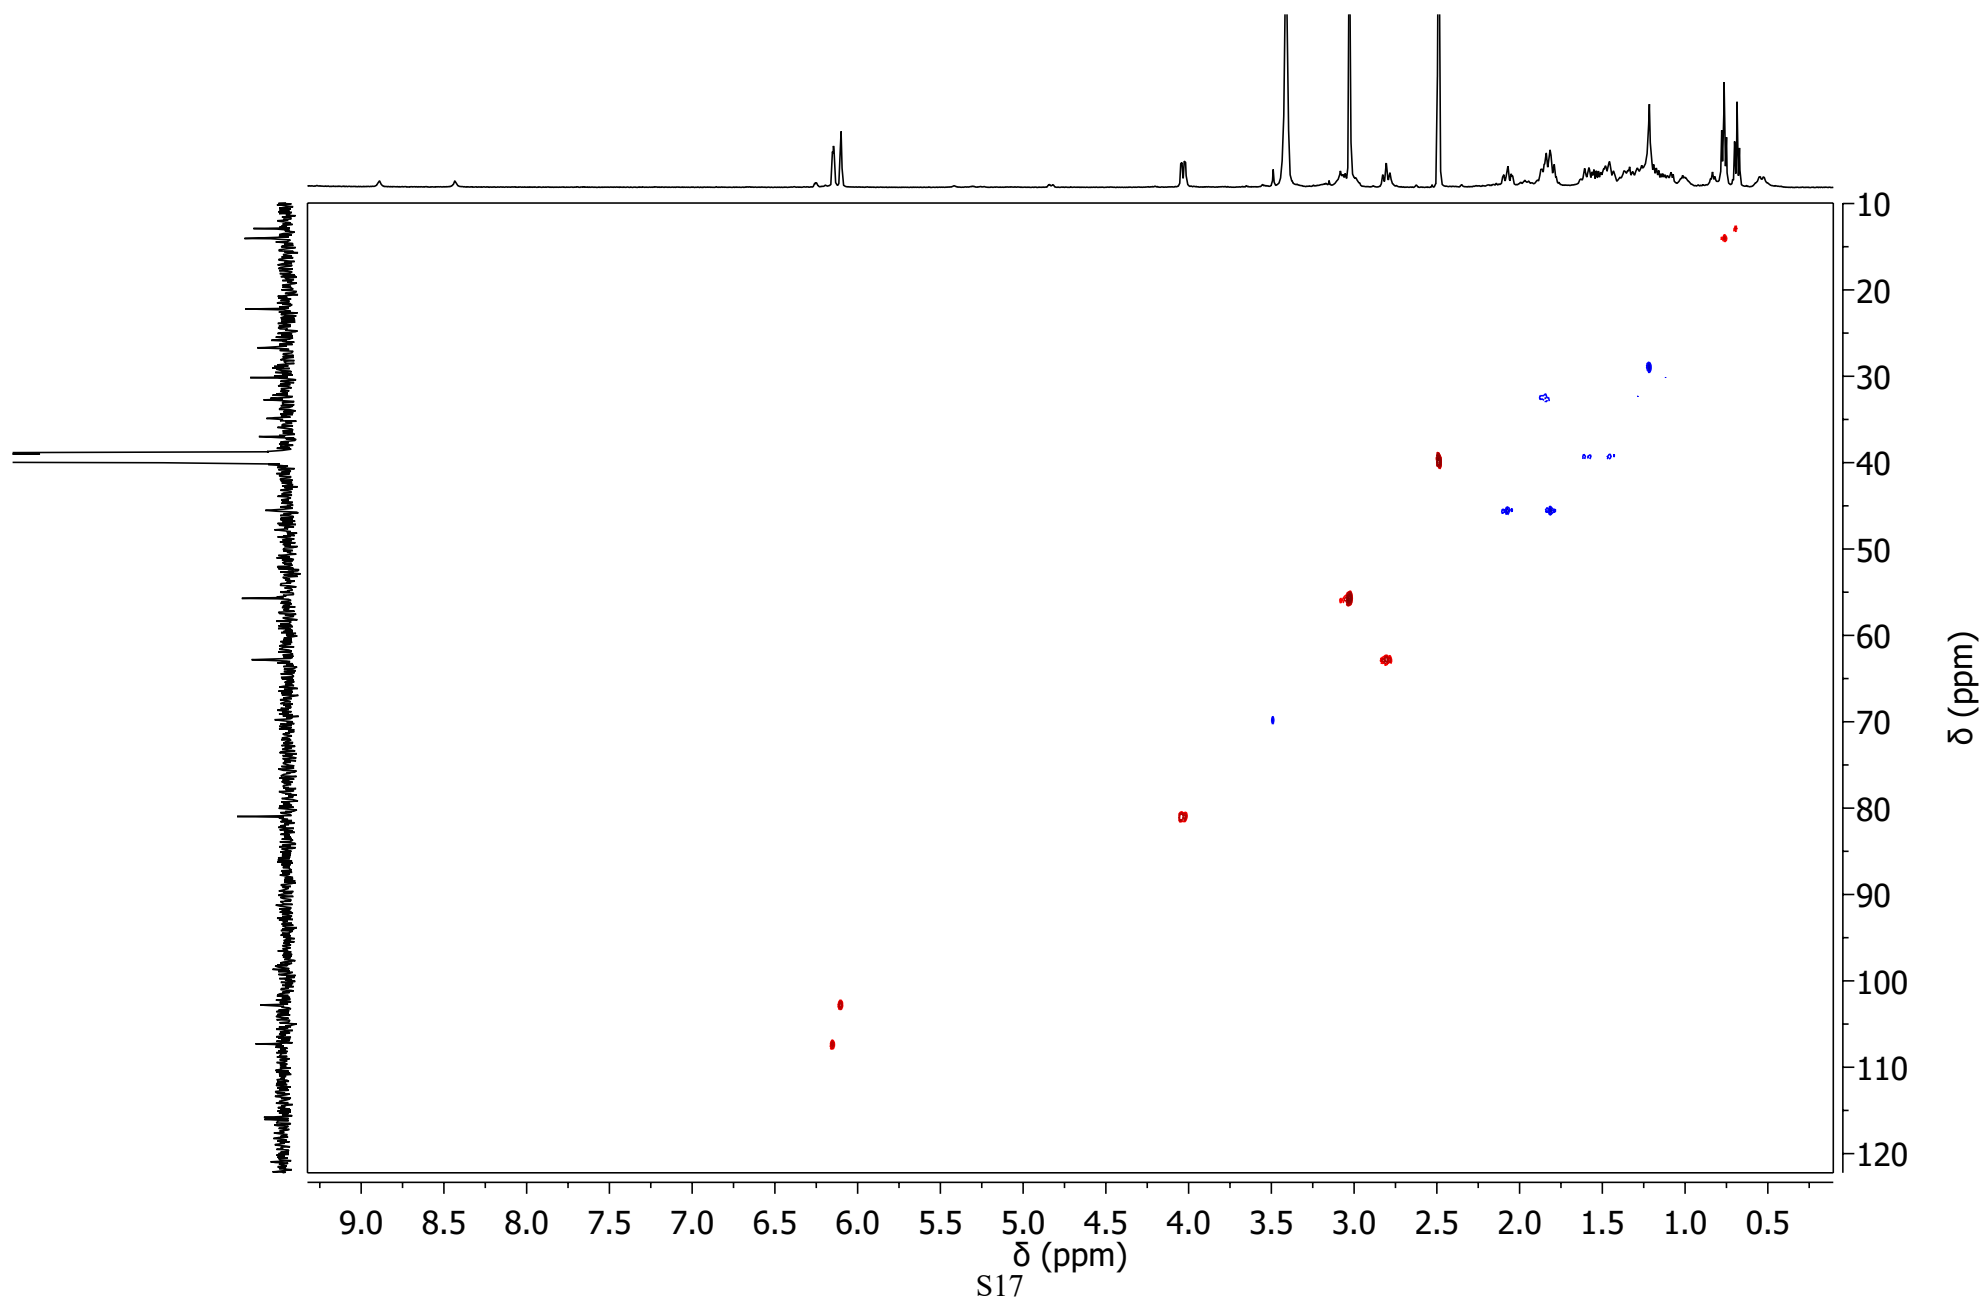

**Figure S16.** COSY NMR Spectrum (500 MHz) of **4** in DMSO<sub>6</sub>

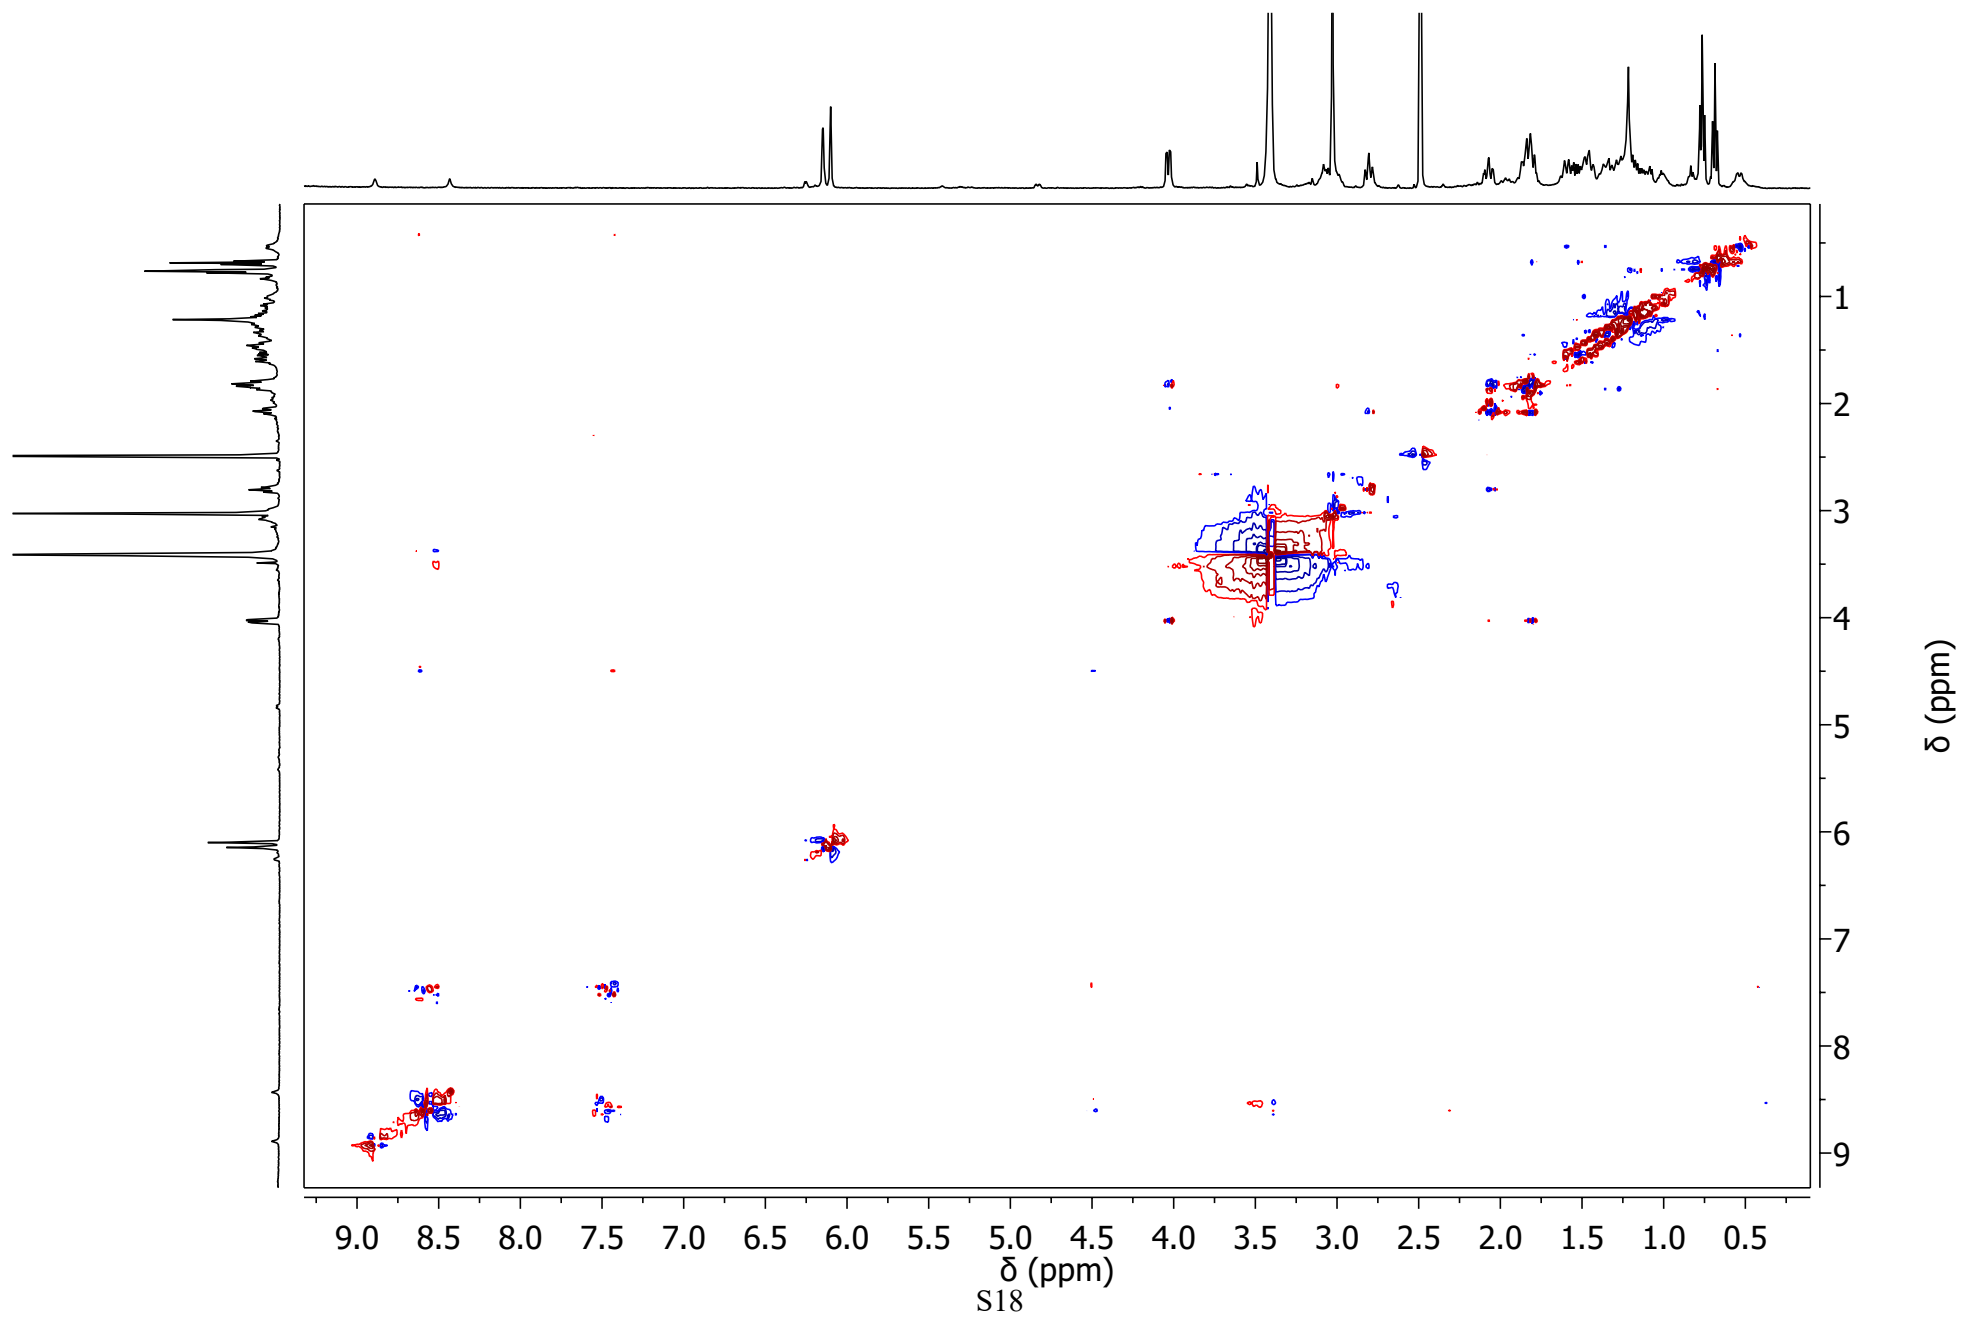

**Figure S17.** HMBC Spectrum (500 MHz) of **4** in DMSO<sub>6</sub>

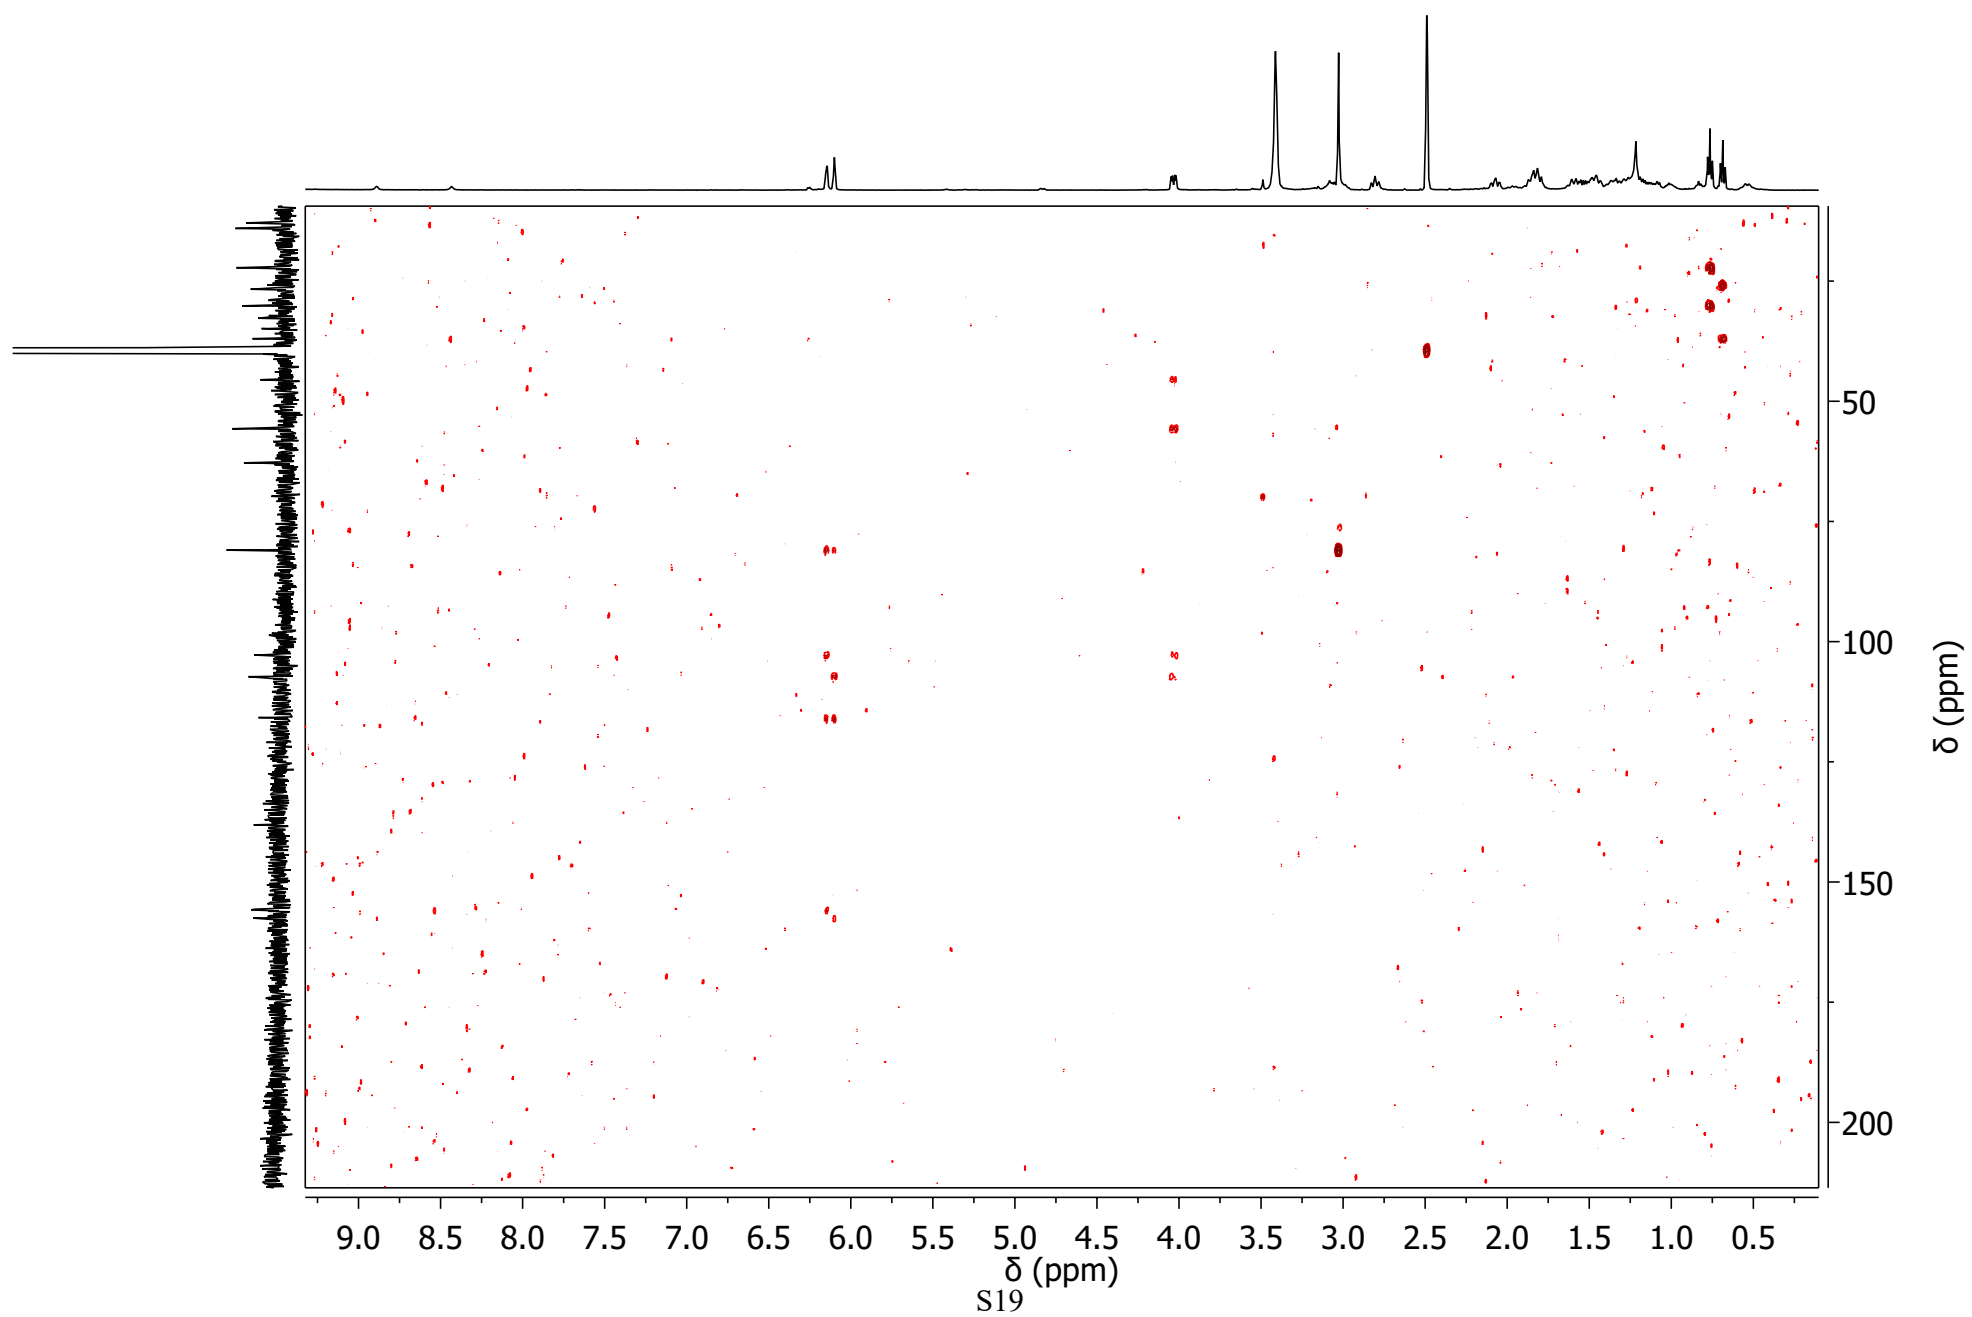

**Figure S18.**  $^1\text{H}$  NMR Spectrum (500 MHz) of **5** in  $\text{DMSO}_6$

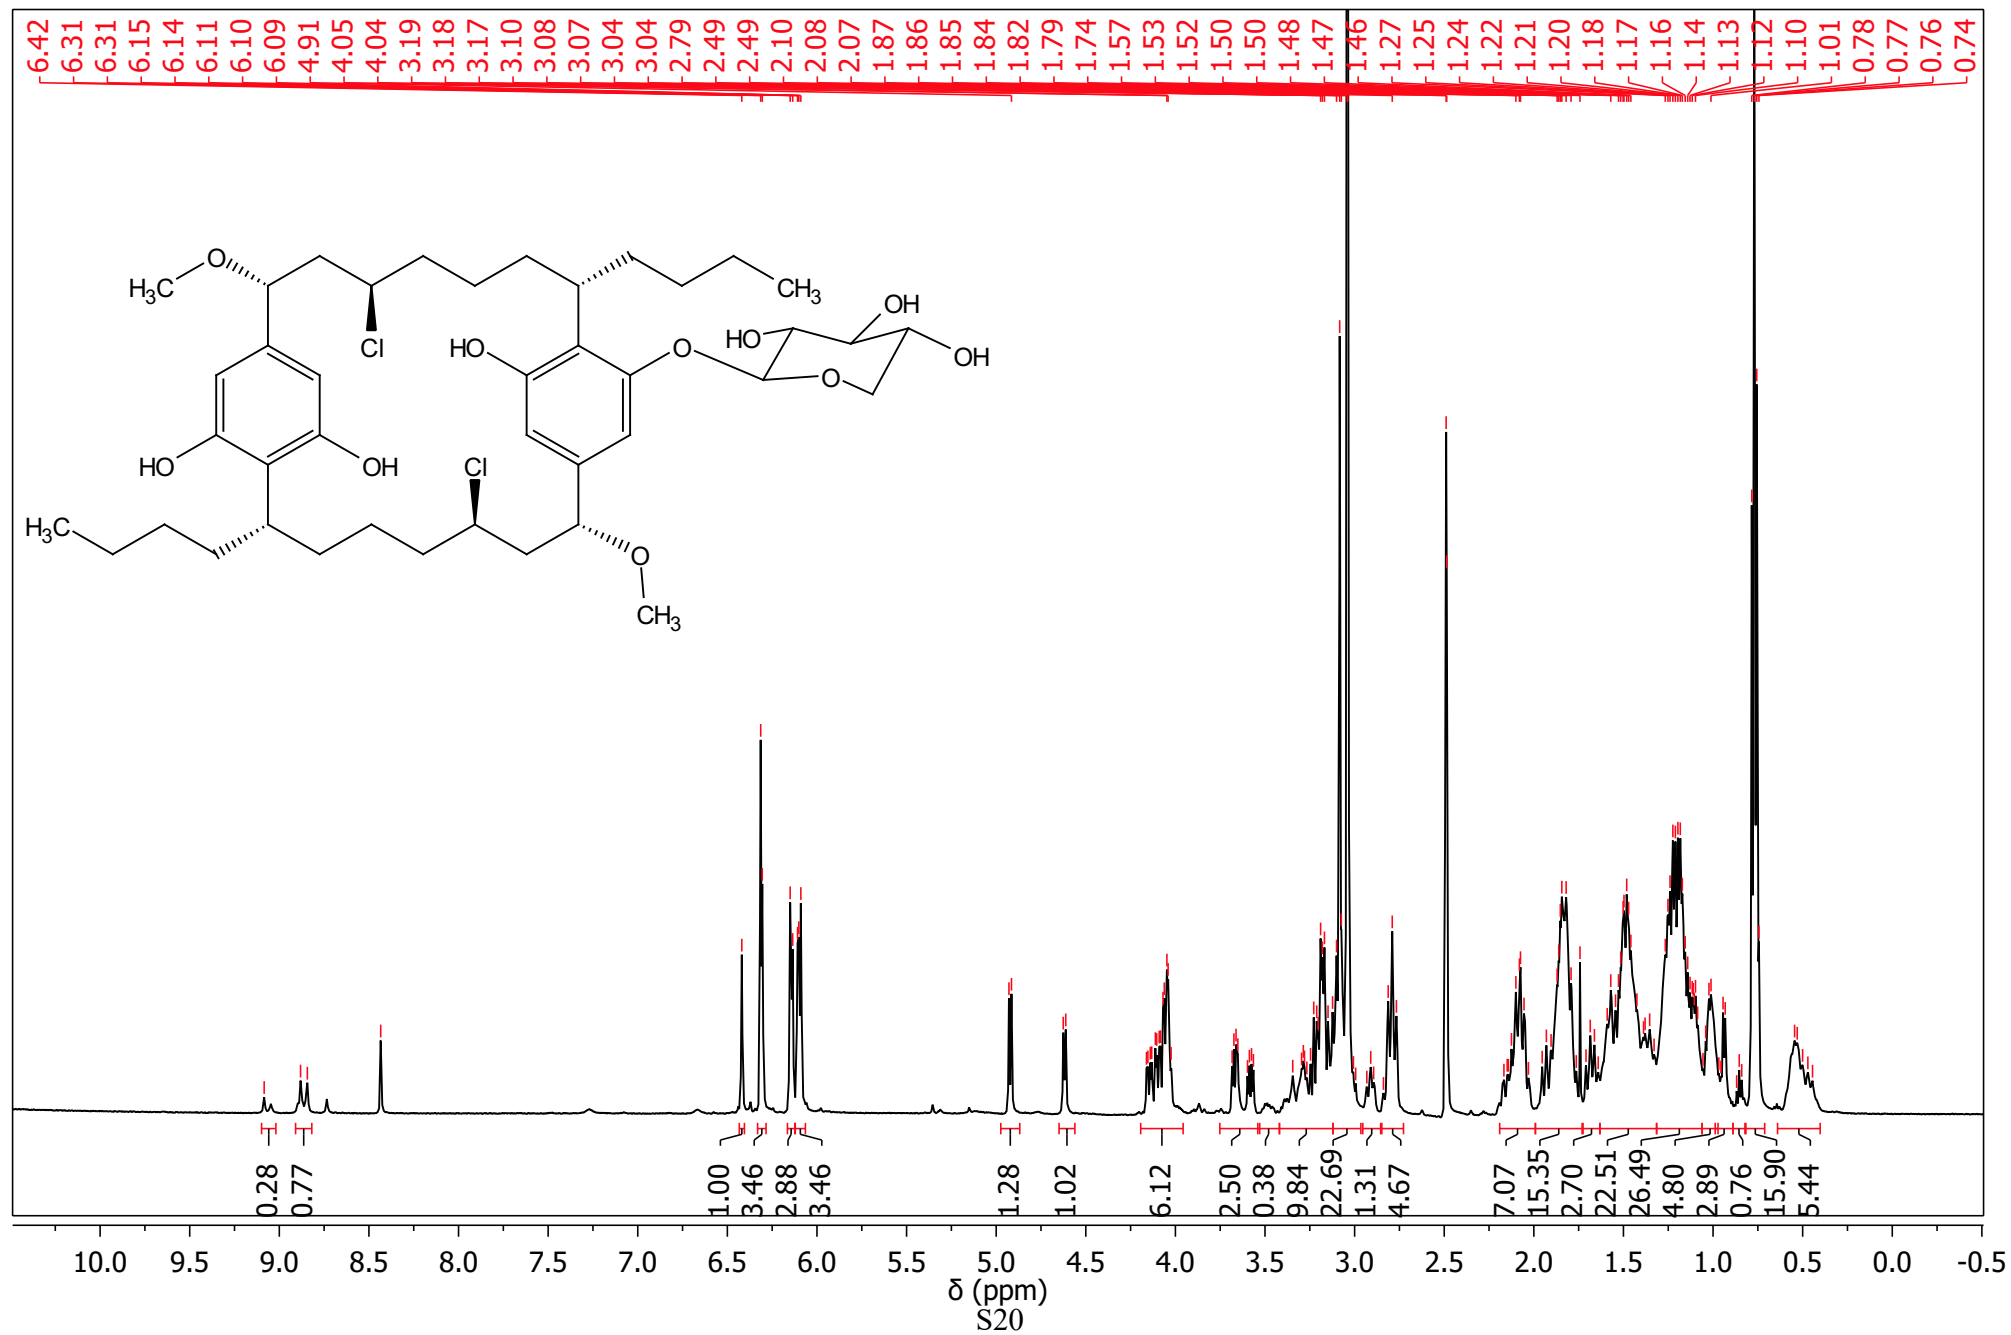

**Figure S19.**  $^{13}\text{C}$  NMR Spectrum (500 MHz) of **5** in  $\text{DMSO}_6$

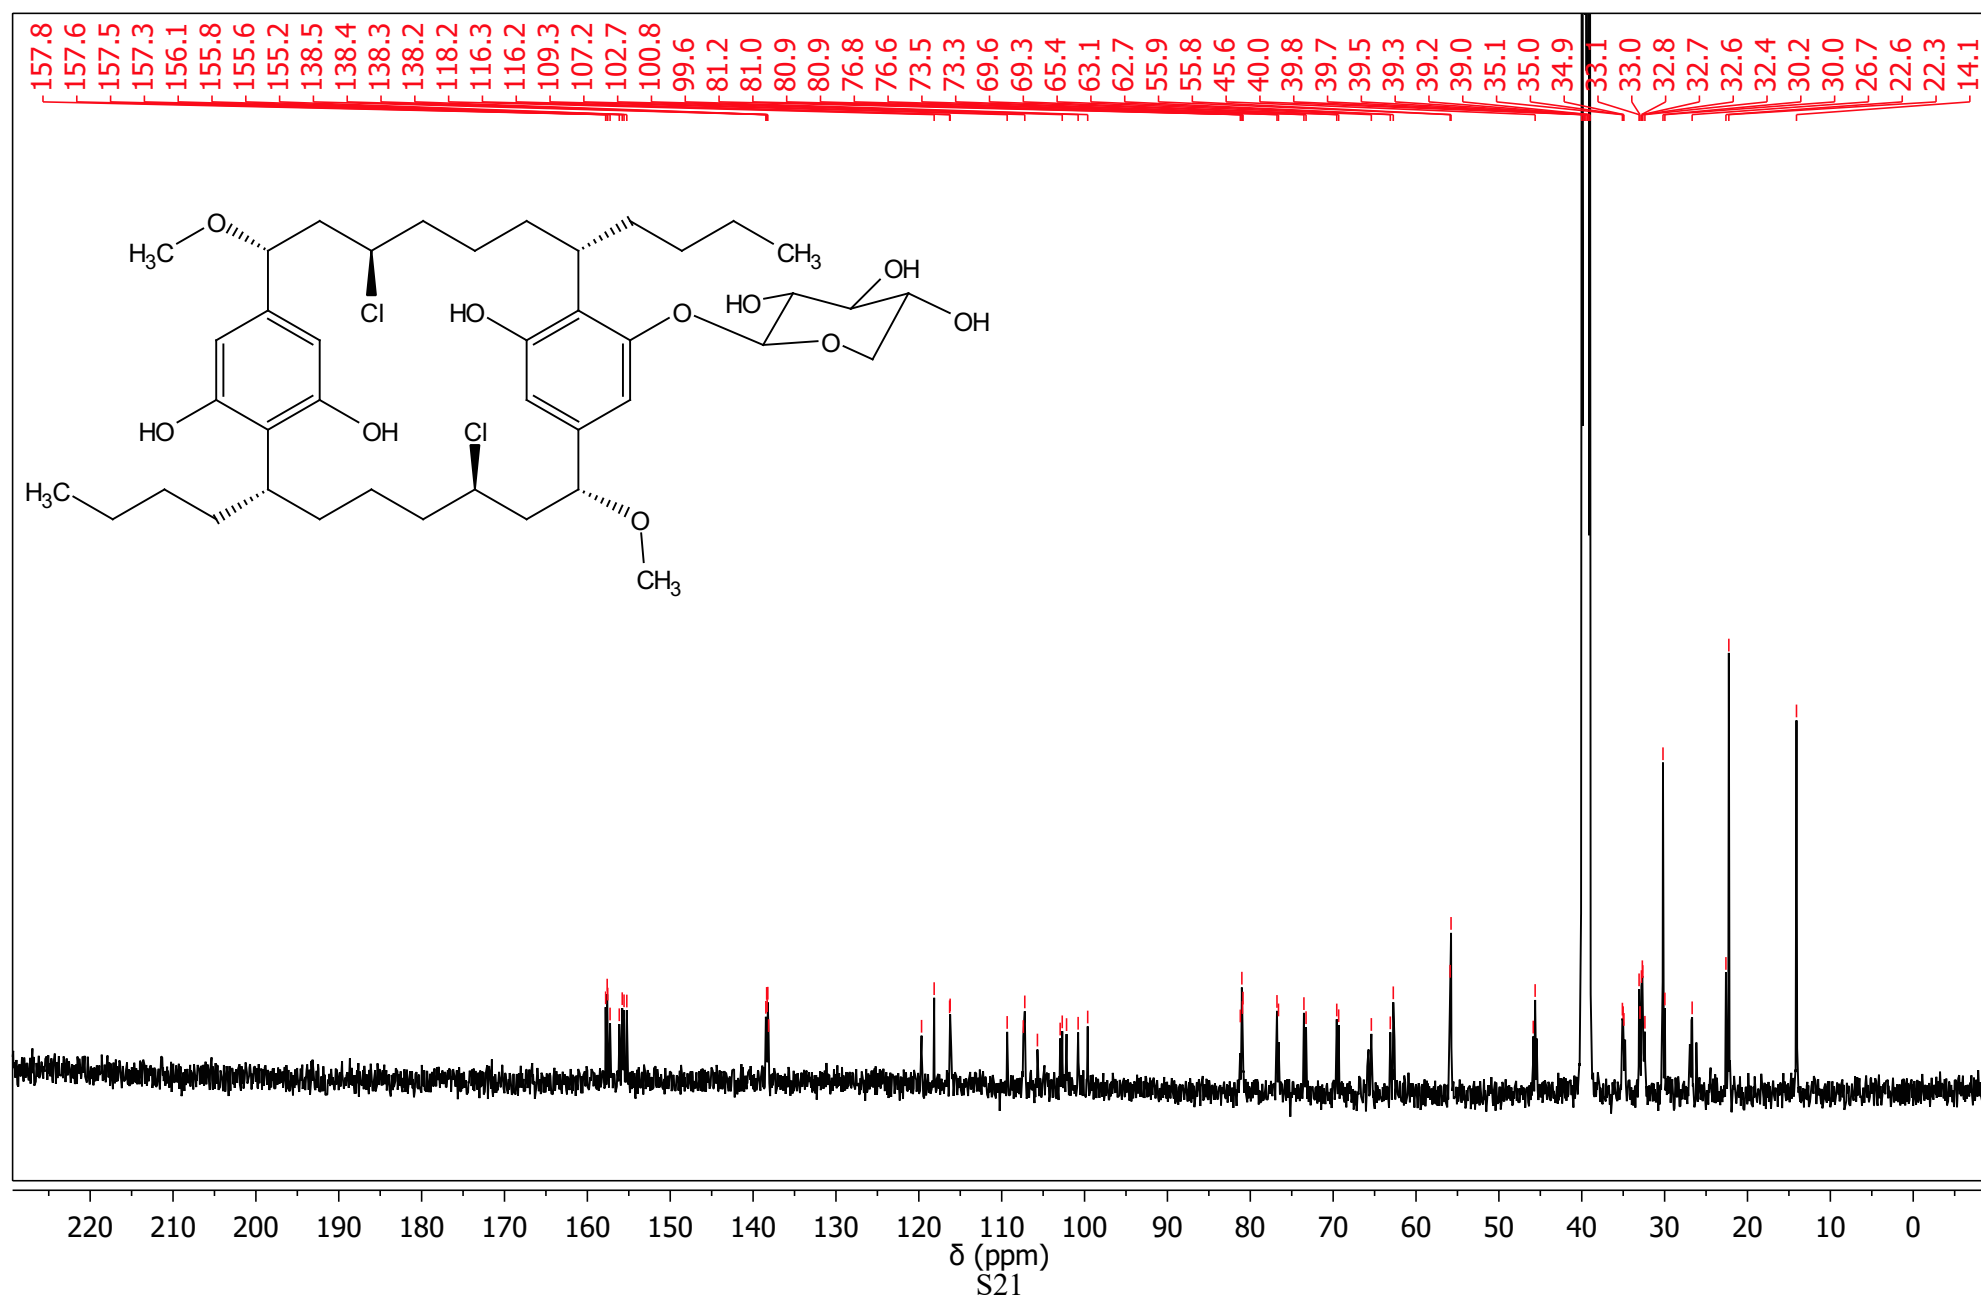

**Figure S20.**  $^1\text{H}$  NMR Spectrum (500 MHz) of **6** in  $\text{CDCl}_3$

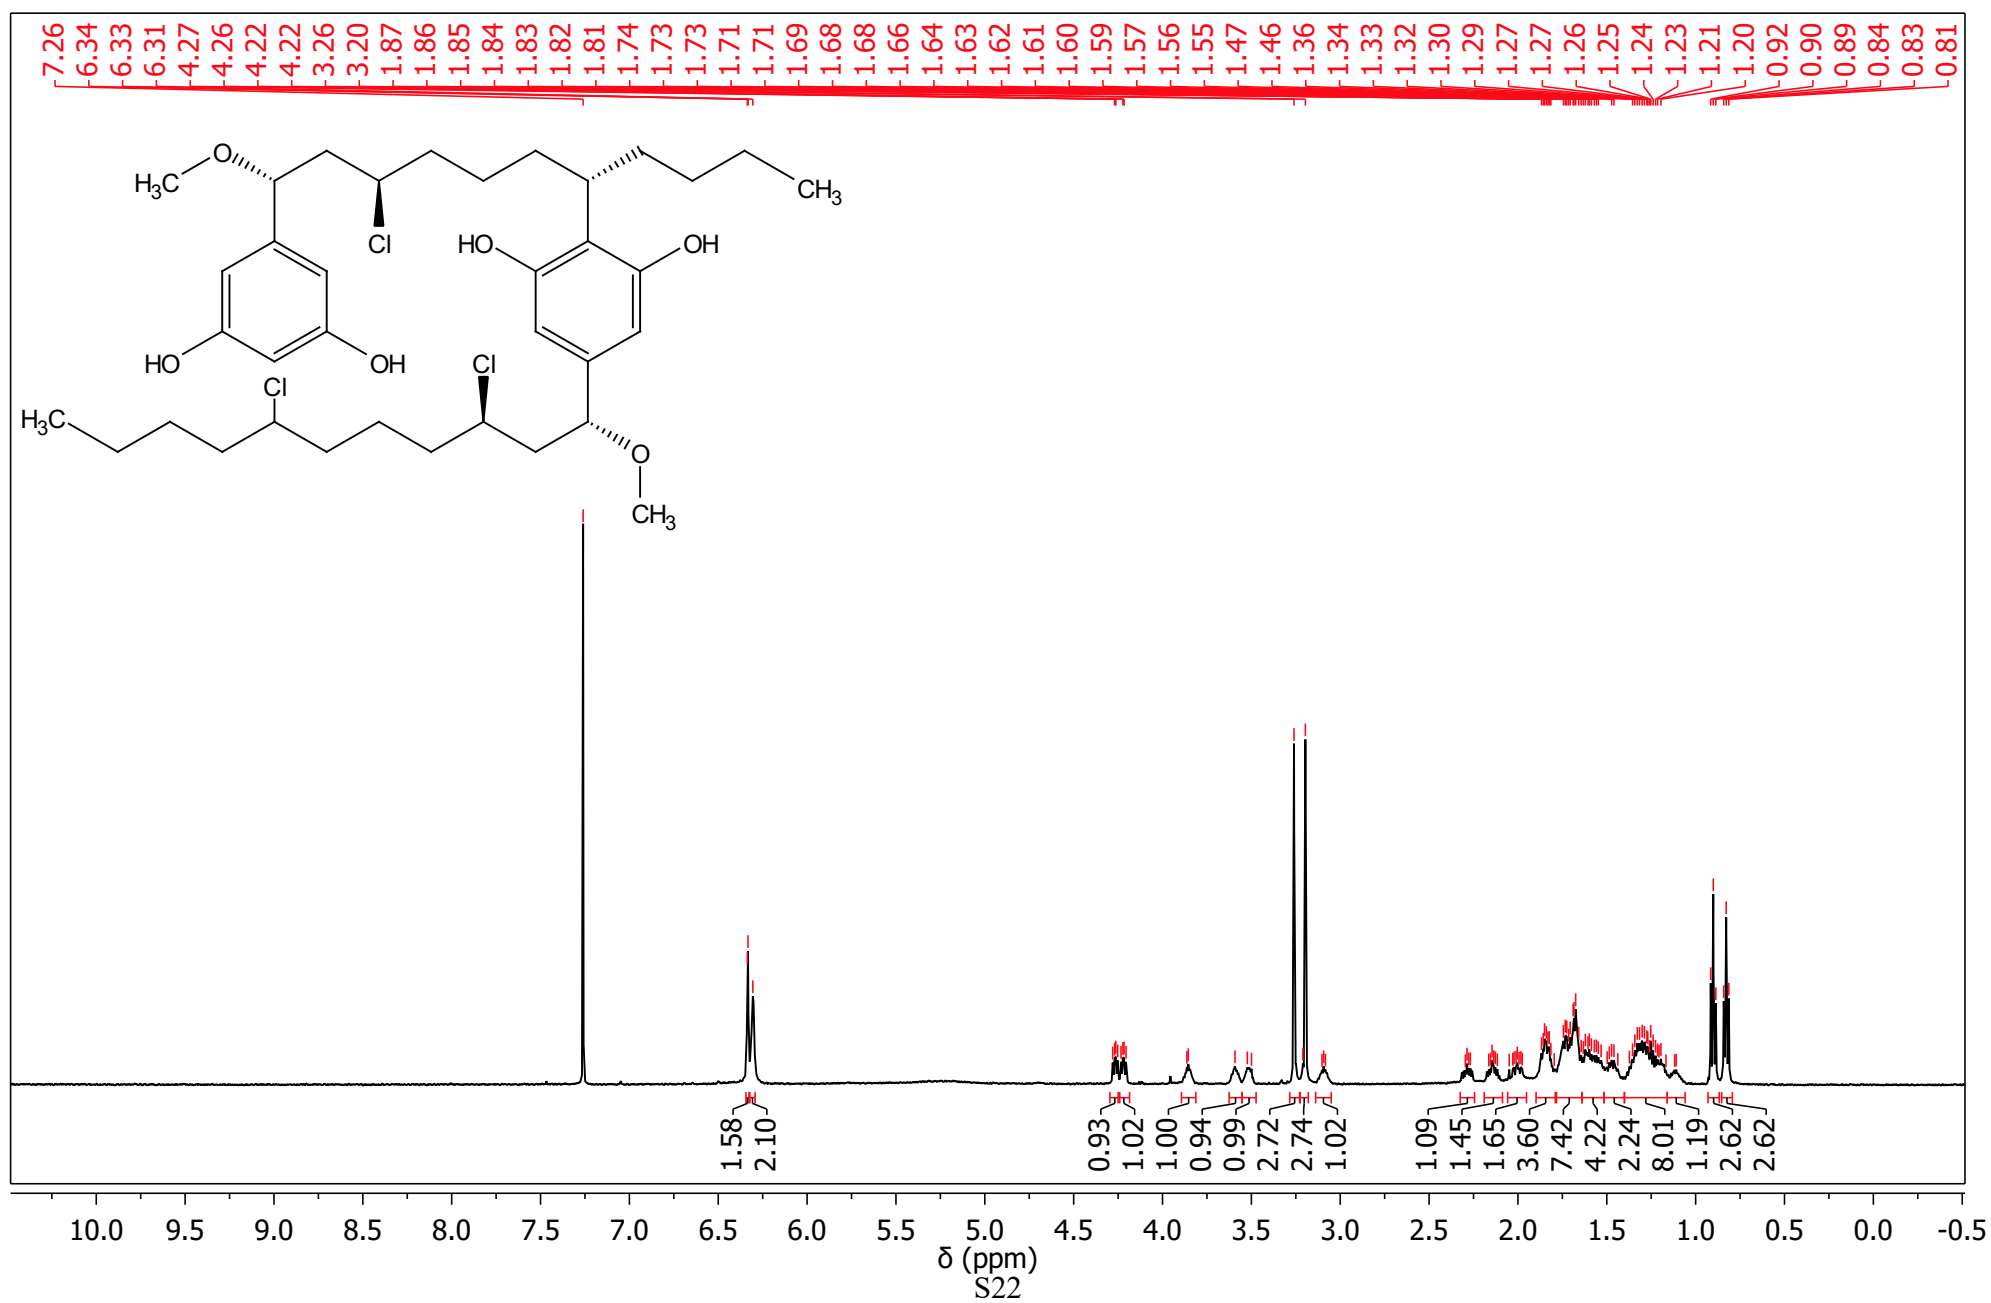

**Figure S21.**  $^{13}\text{C}$  NMR Spectrum (125 MHz) of **6** in  $\text{CDCl}_3$

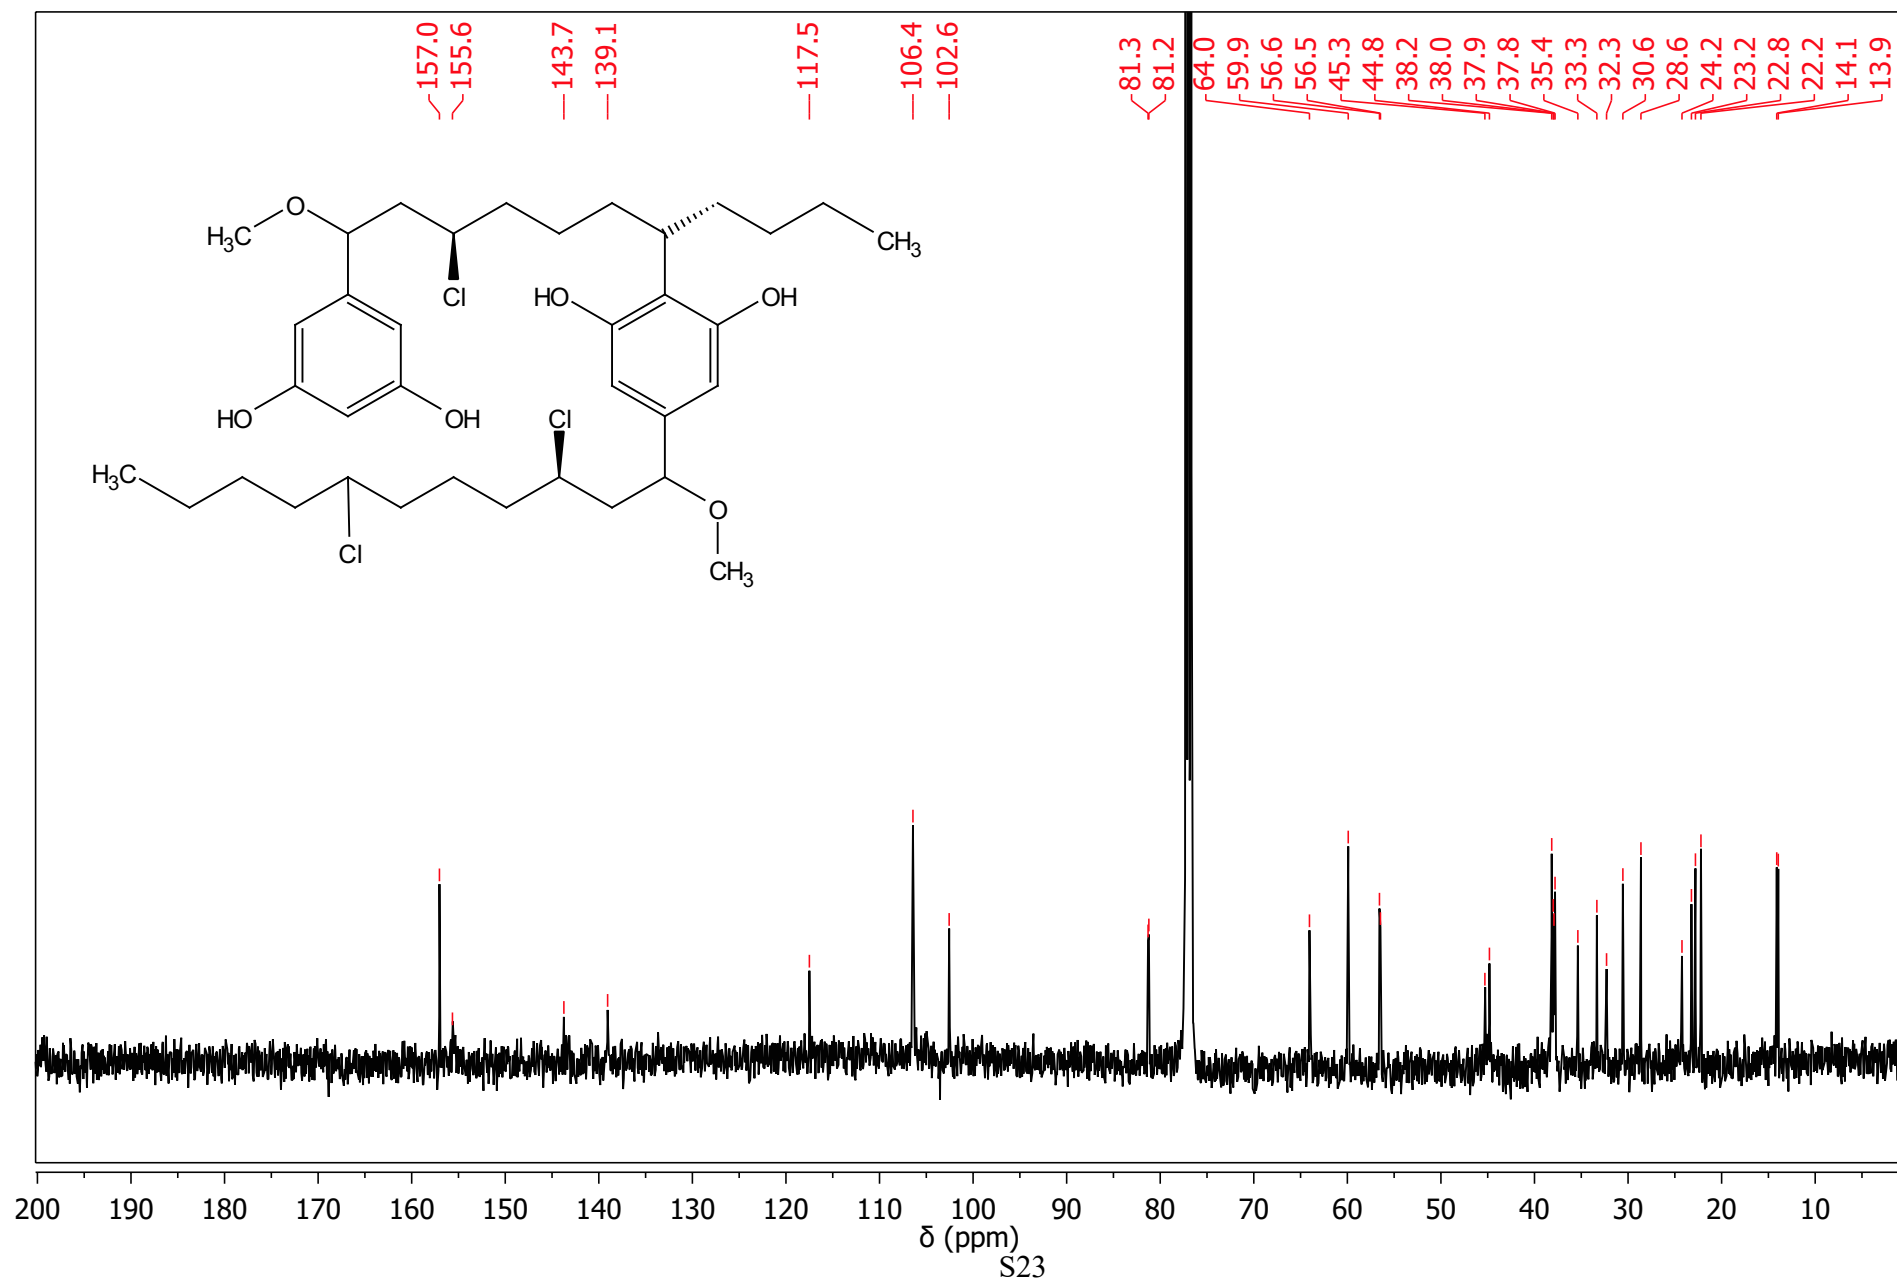

**Figure S22.** HSQC NMR Spectrum (500 MHz) of **6** in CDCl<sub>3</sub>

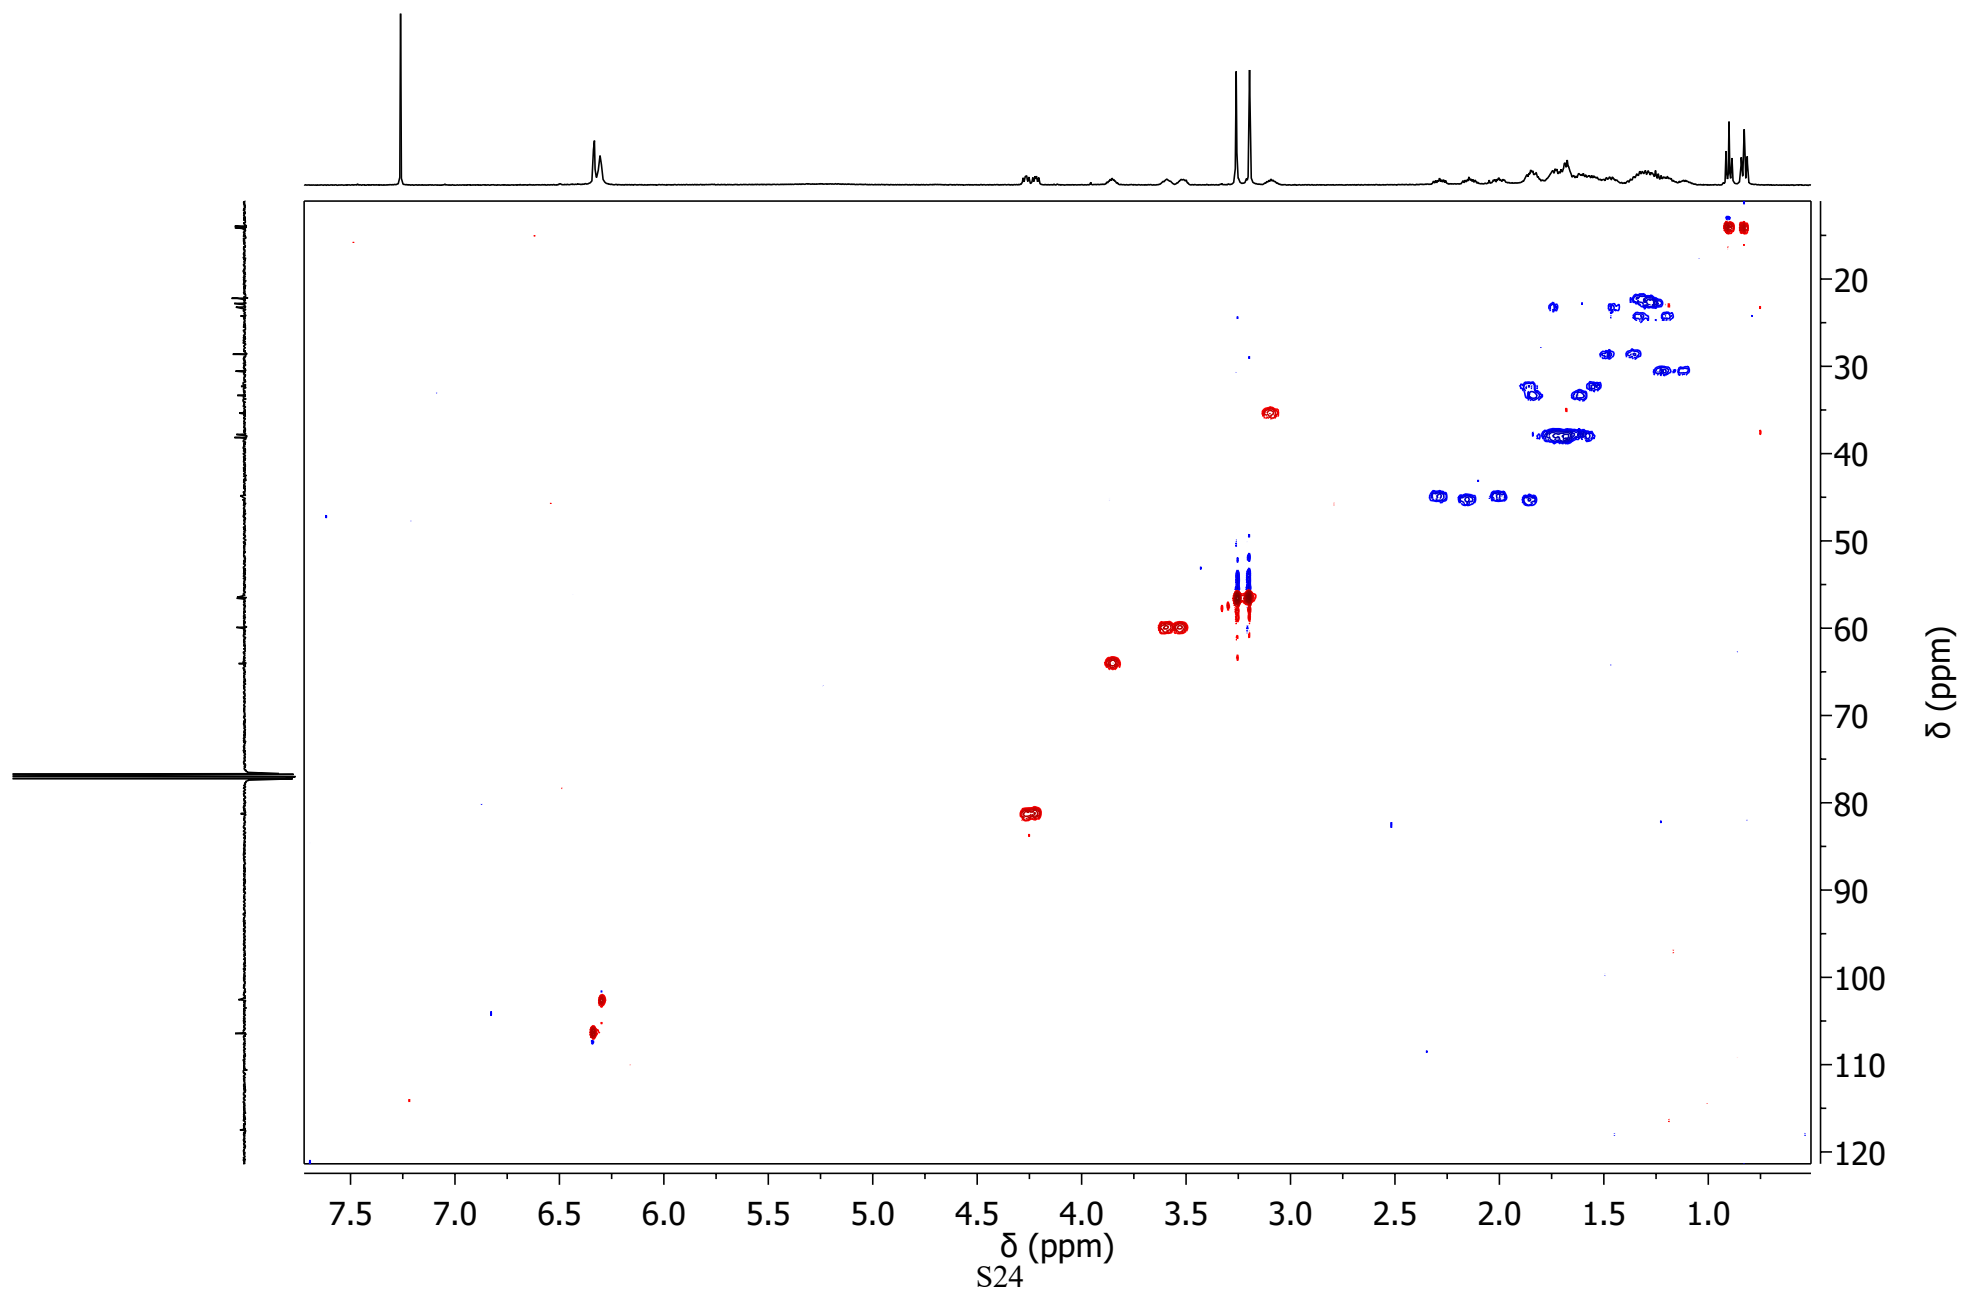



**Figure S23.** COSY NMR Spectrum (500 MHz) of **6** in CDCl<sub>3</sub>

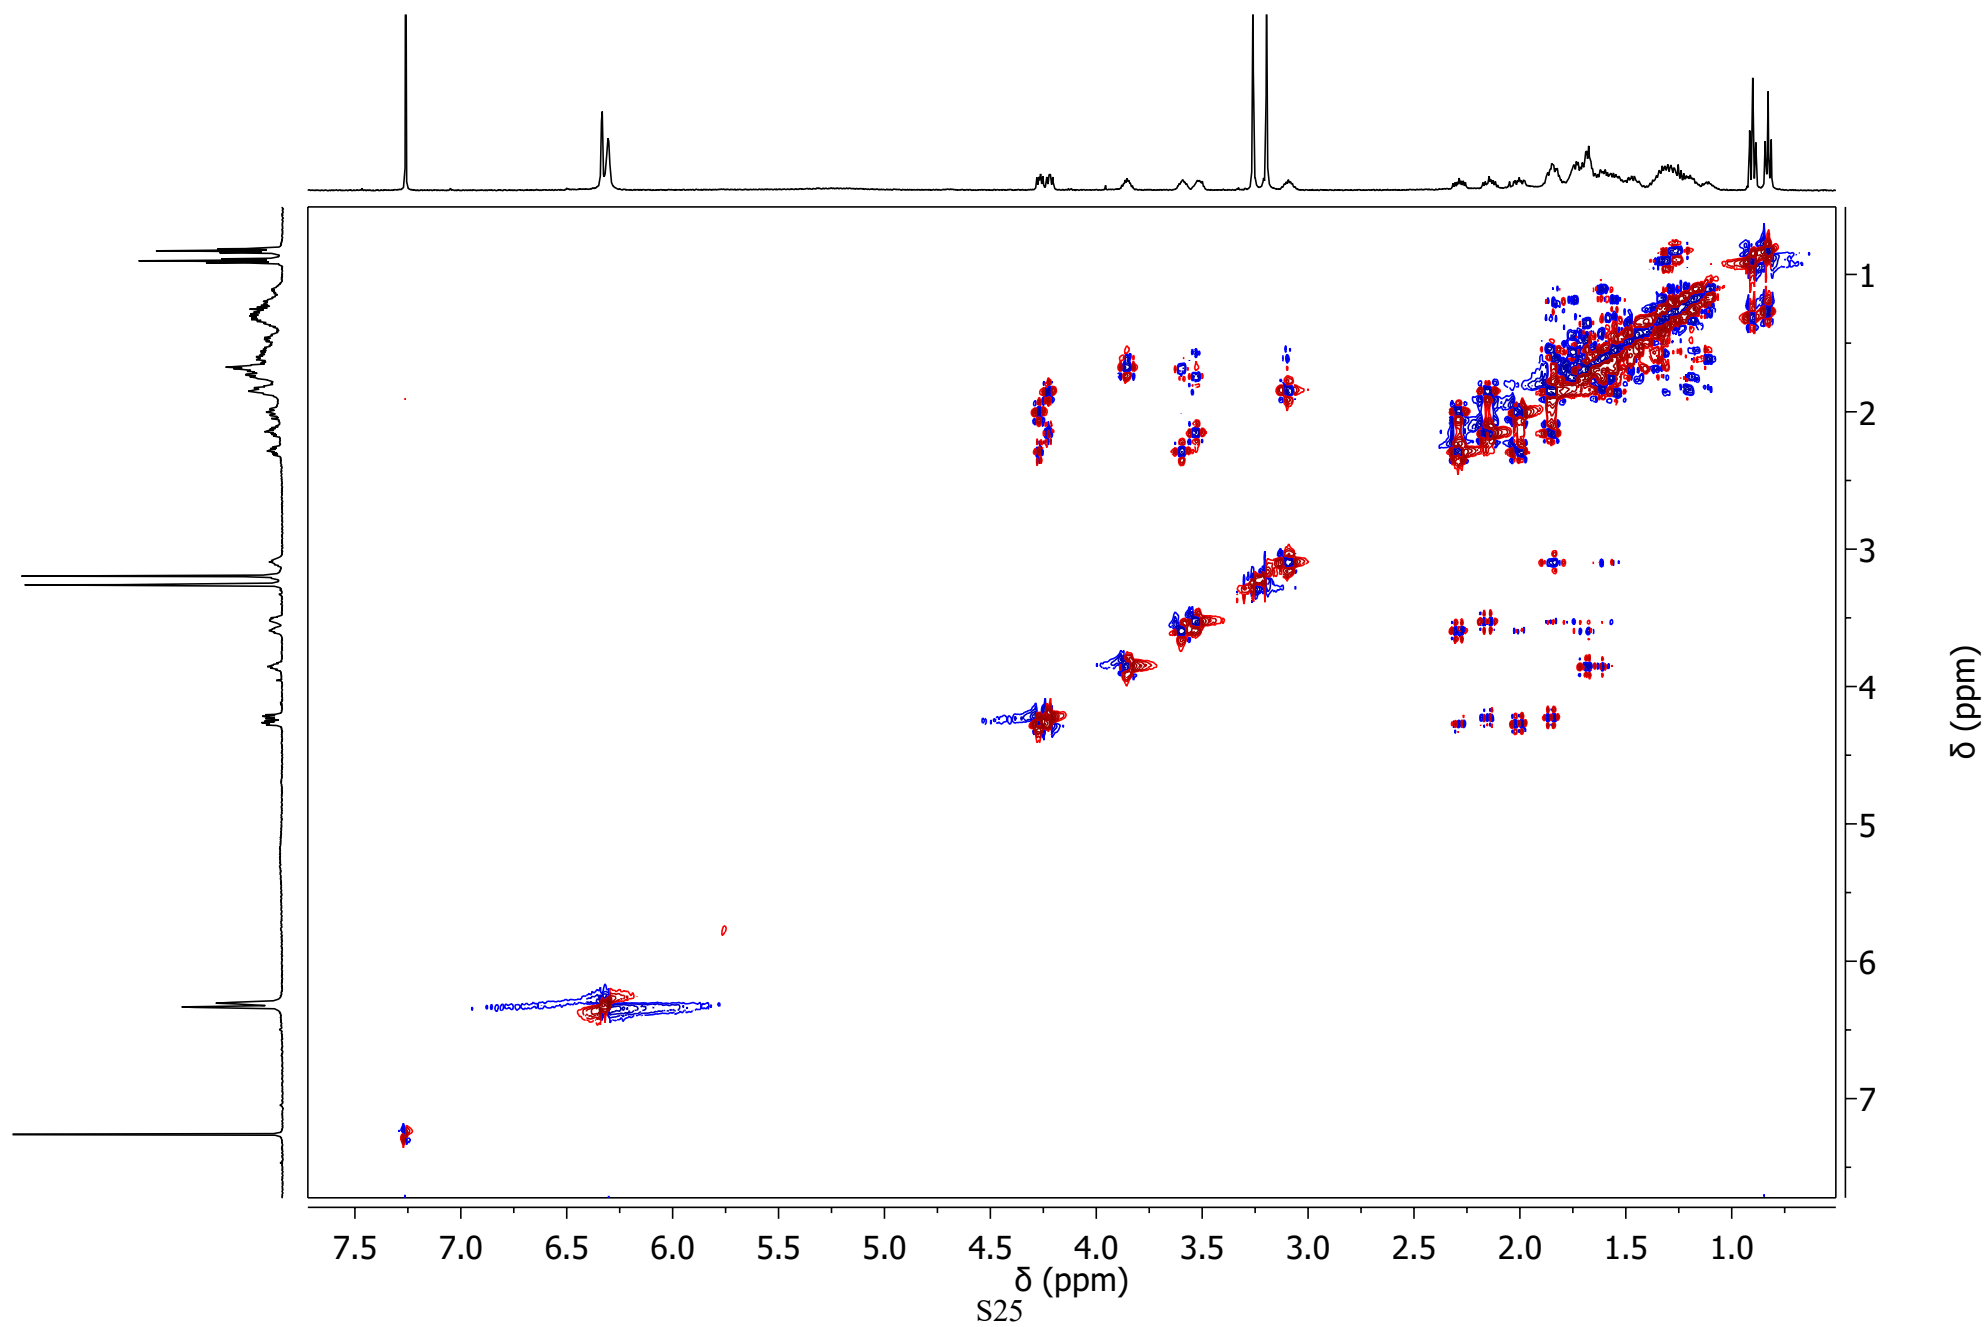

**Figure S24.** HMBC Spectrum (500 MHz) of **6** in CDCl<sub>3</sub>

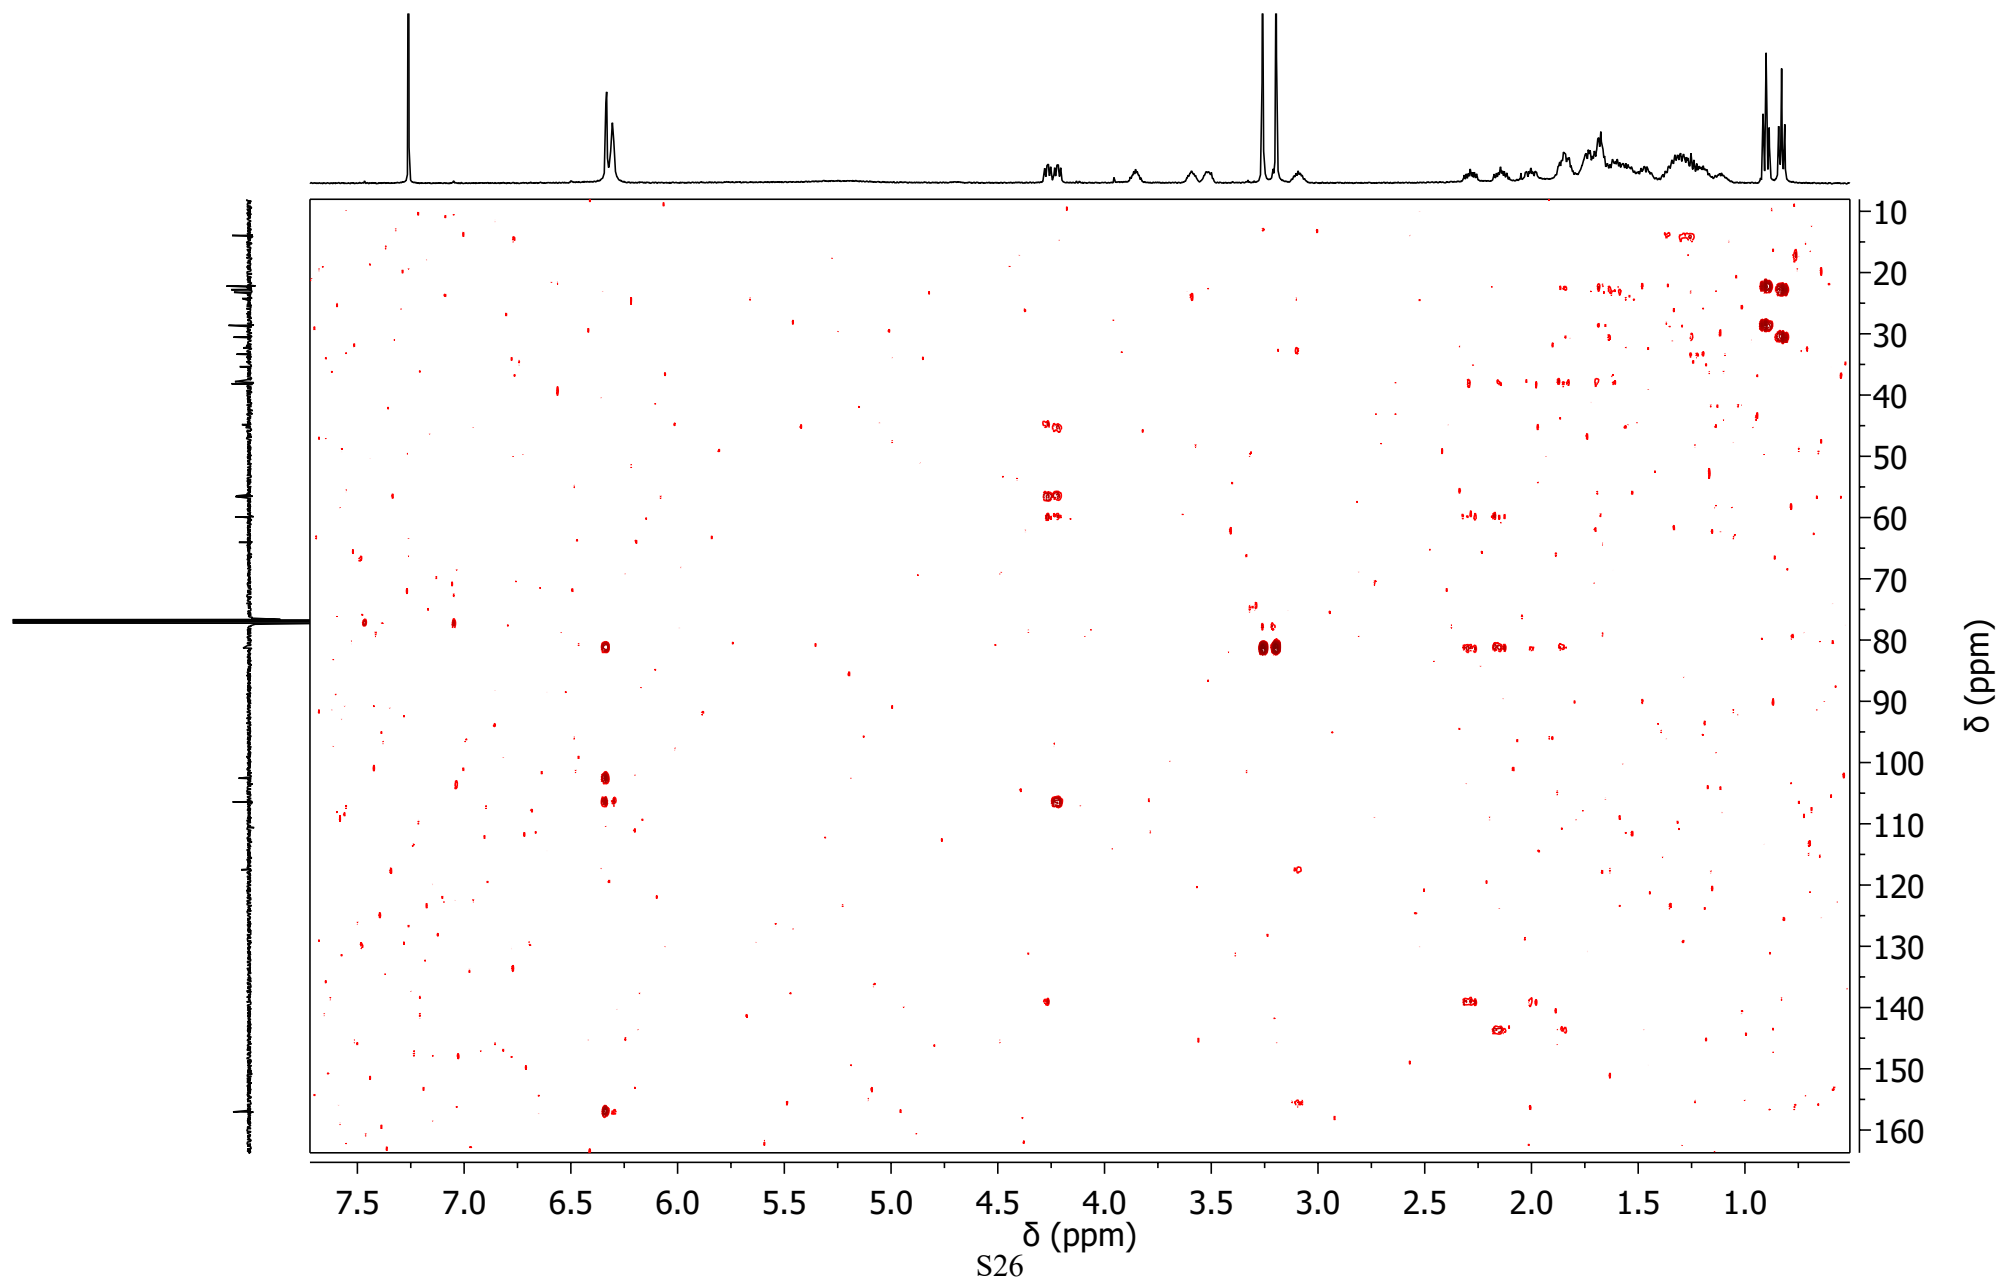

**Figure S25.**  $^1\text{H}$  NMR Spectrum (500 MHz) of **6** in  $\text{DMSO}_6$

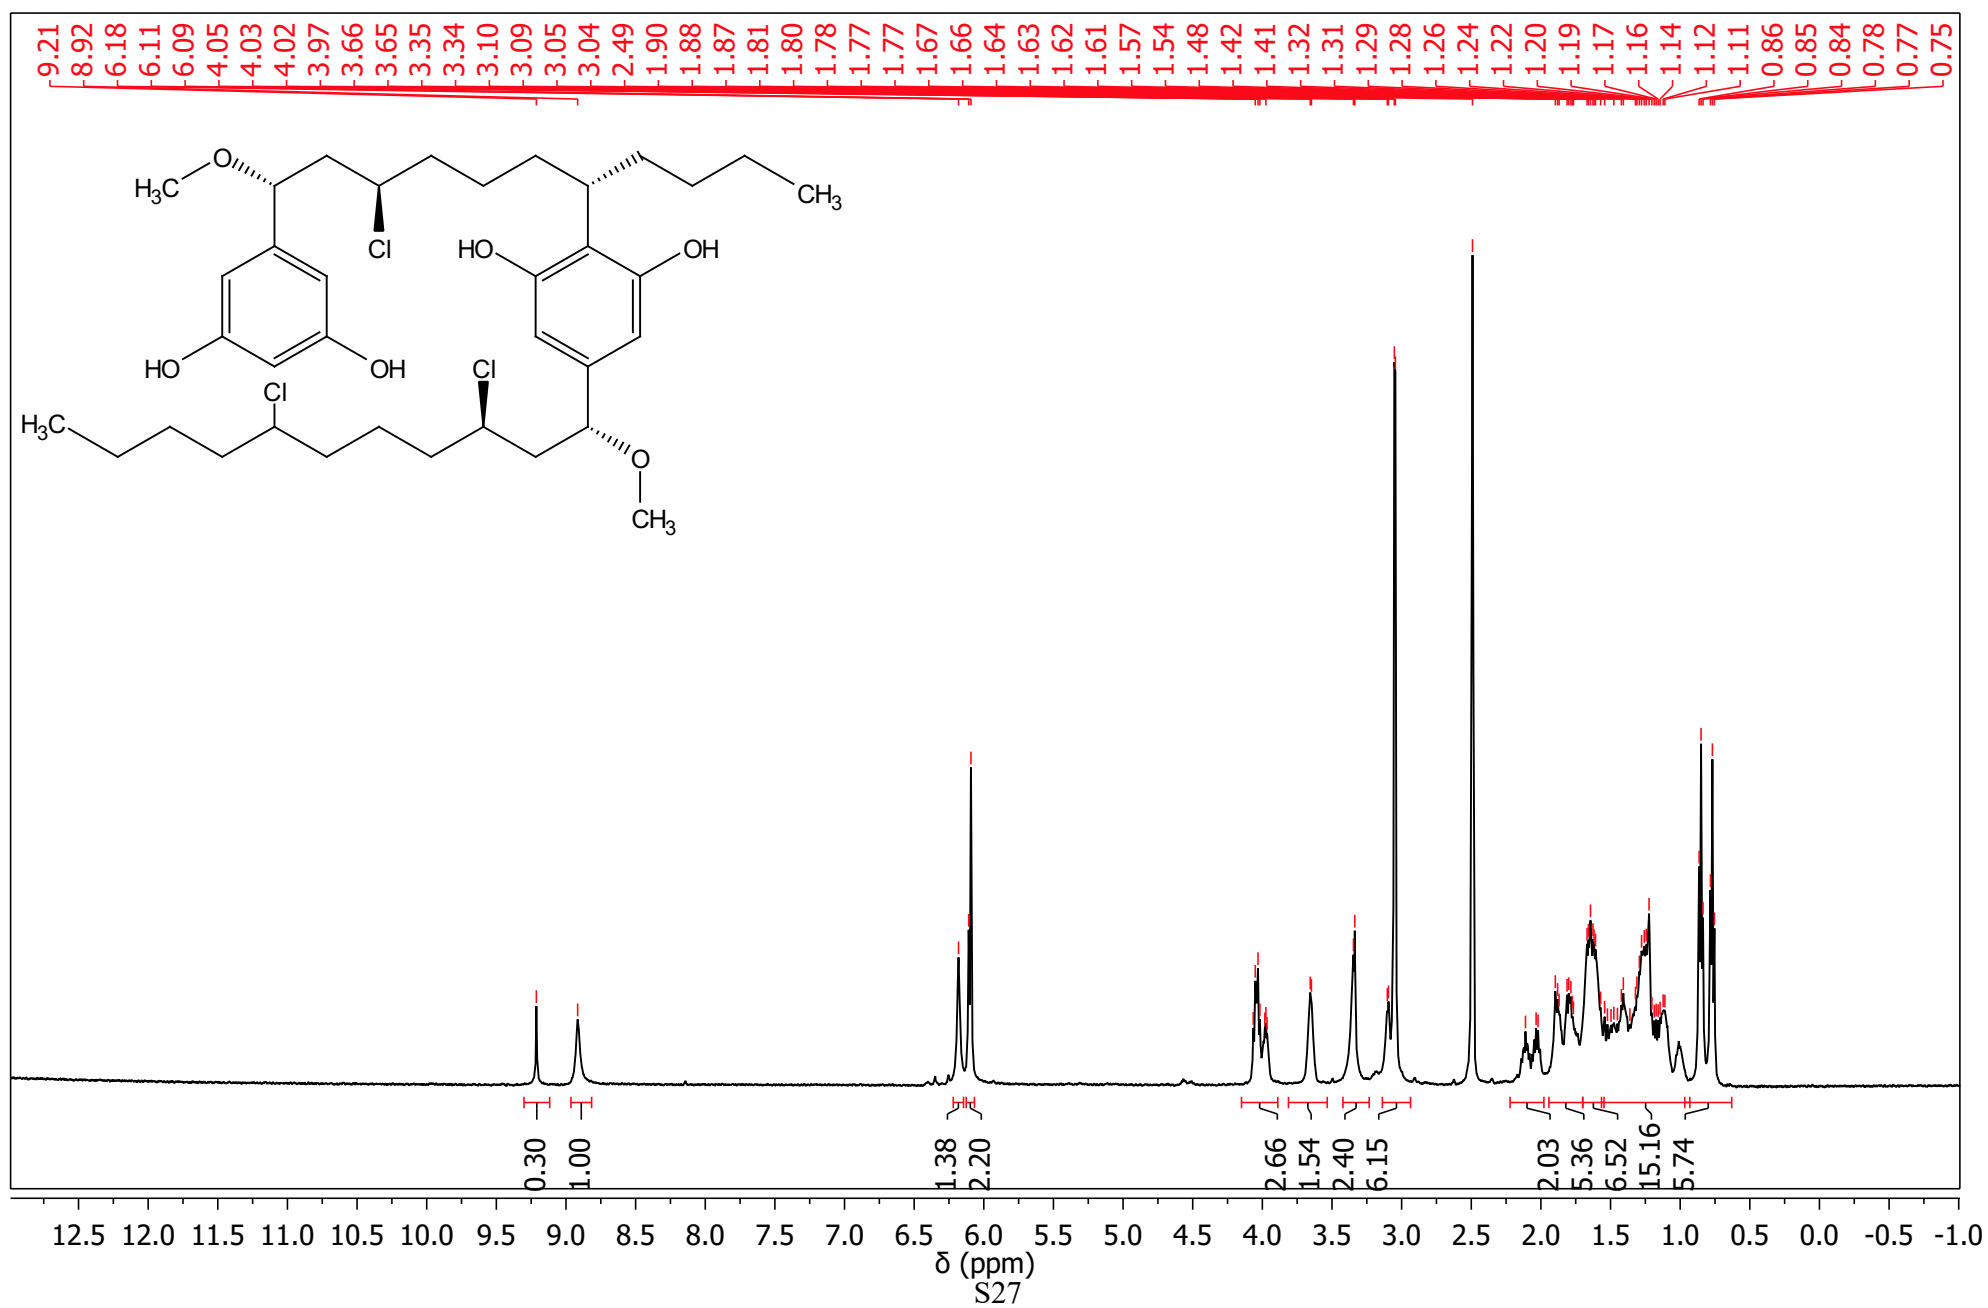

**Figure S26.**  $^{13}\text{C}$  NMR Spectrum (125 MHz) of **6** in  $\text{DMSO}_6$

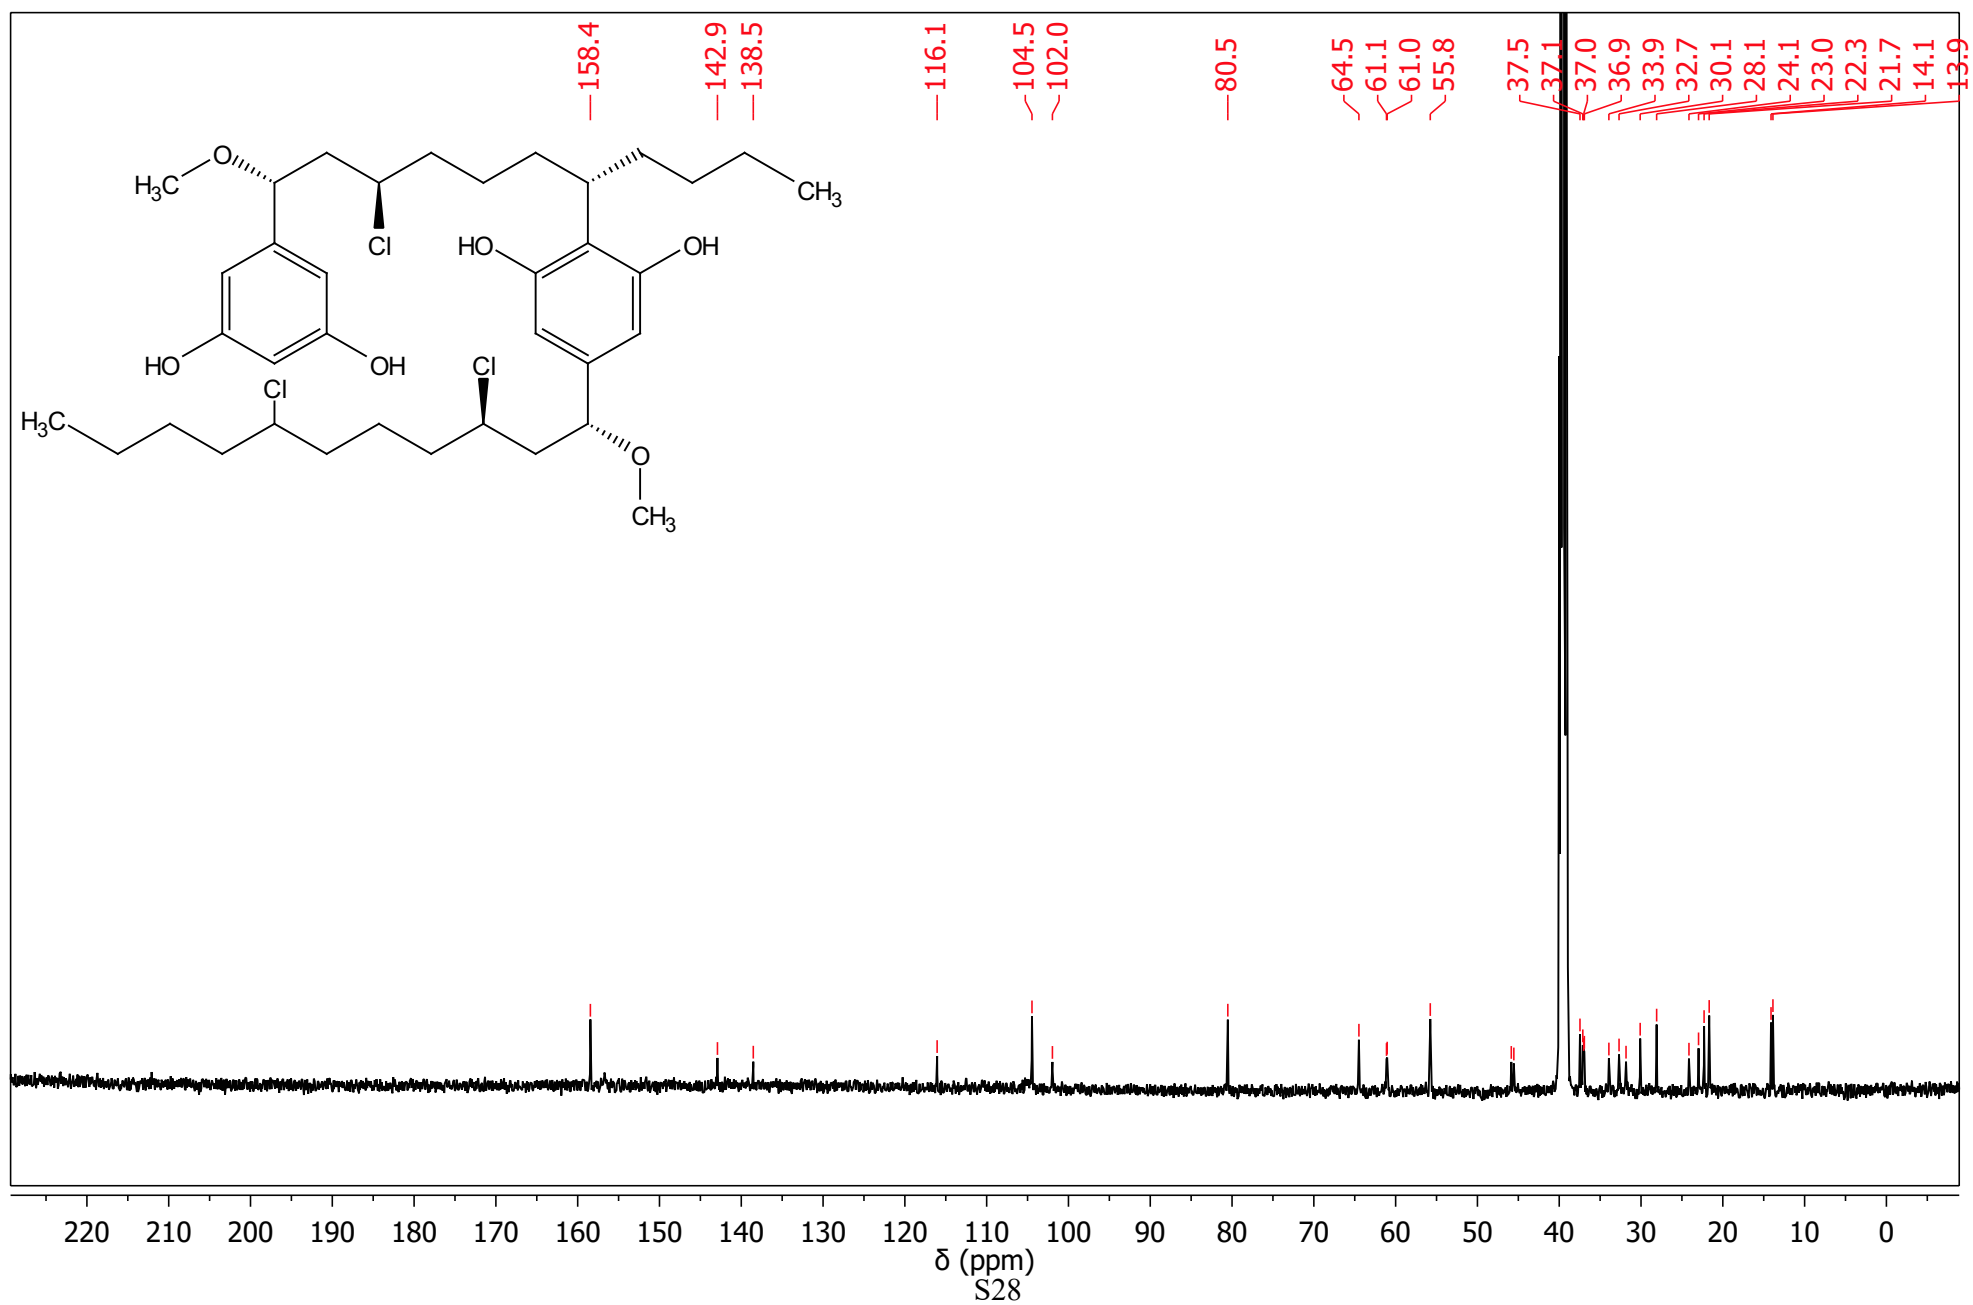

**Figure S27.** HR-ESI-MS Spectrum of **1**

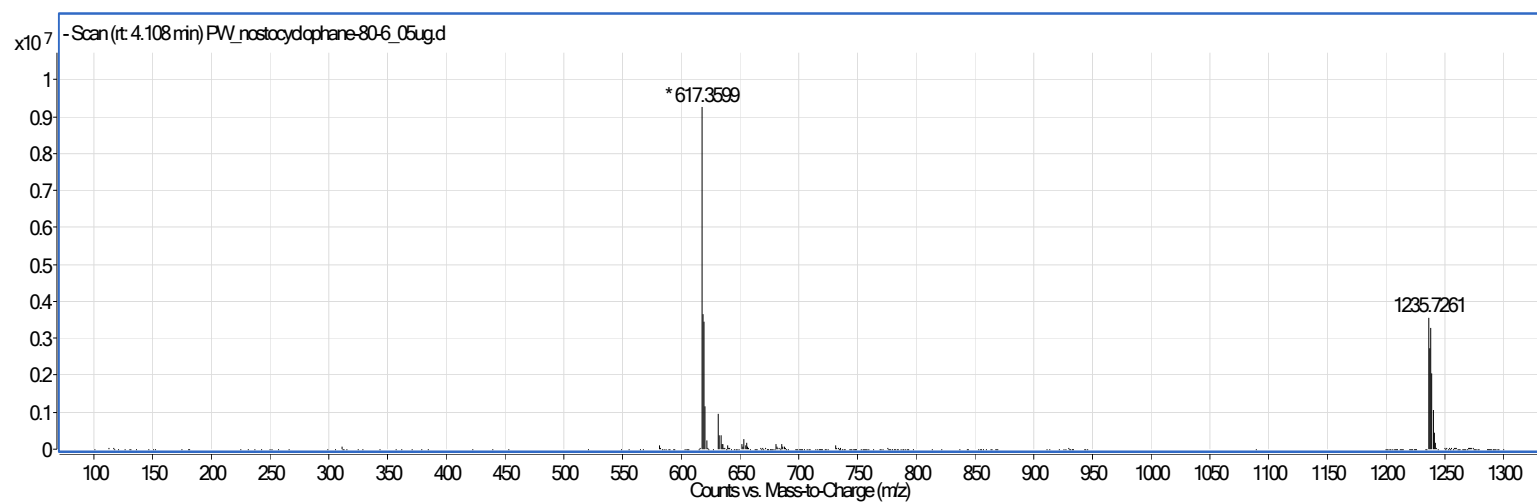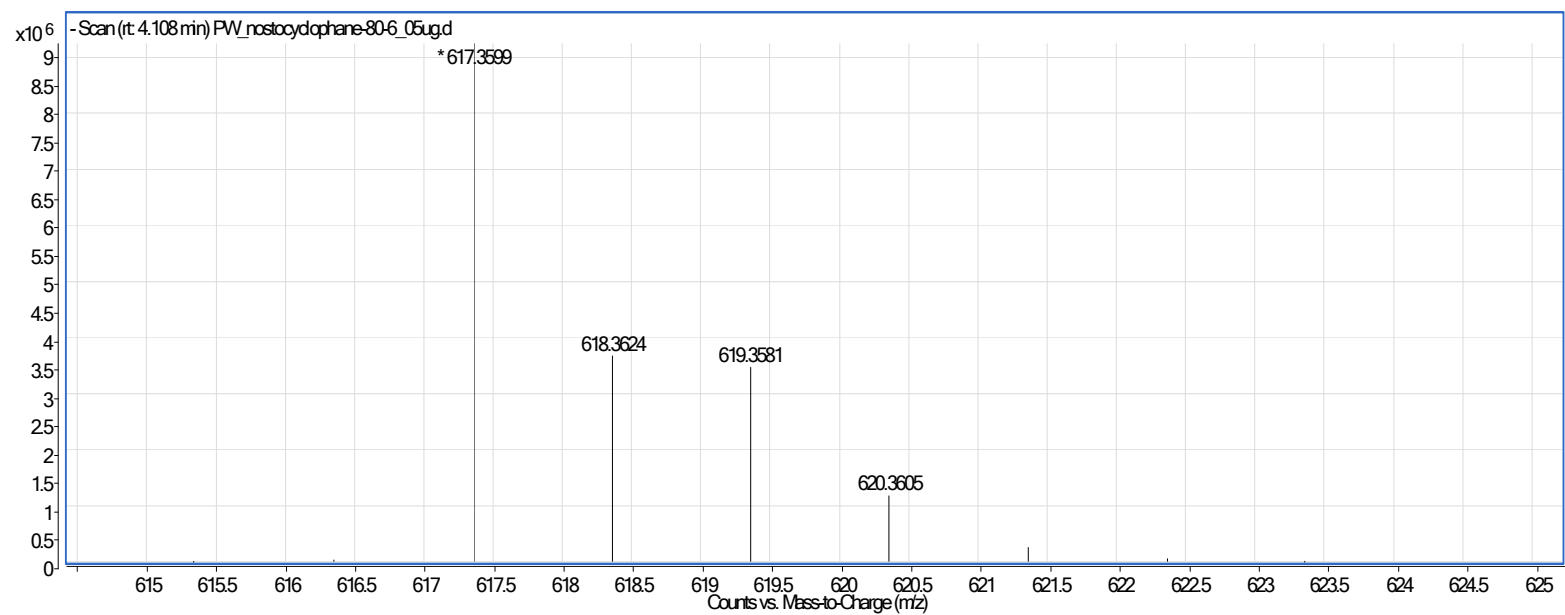

**Figure S28.** HR-ESI-MS Spectrum of **2**

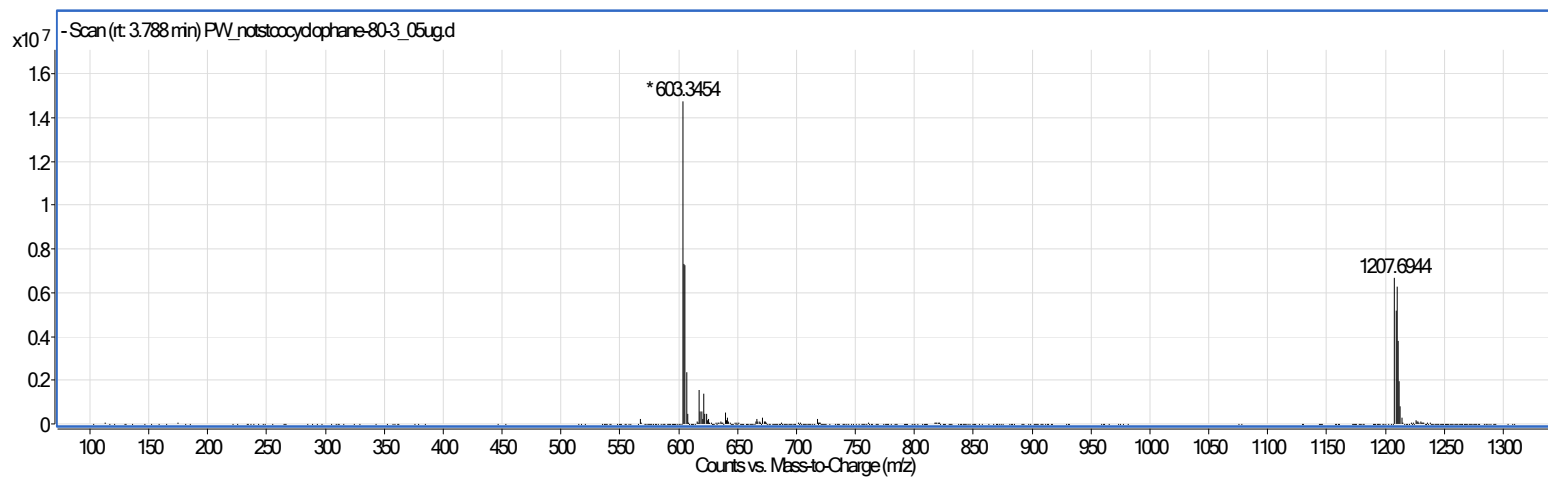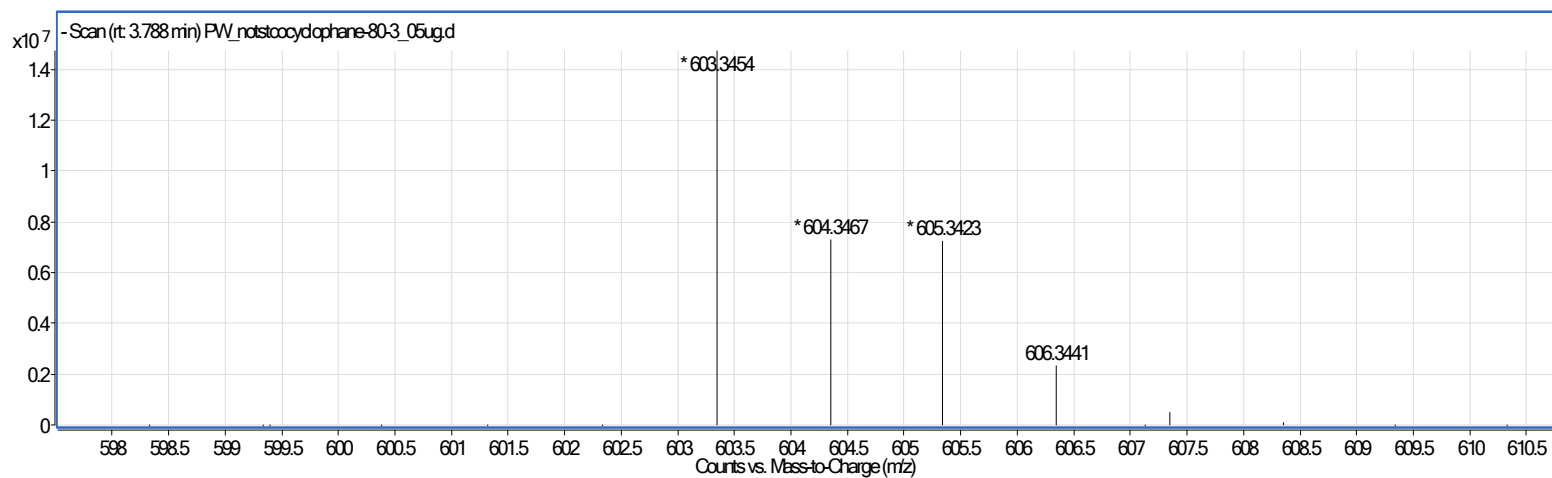

**Figure S29.** HR-ESI-MS Spectrum of **3**

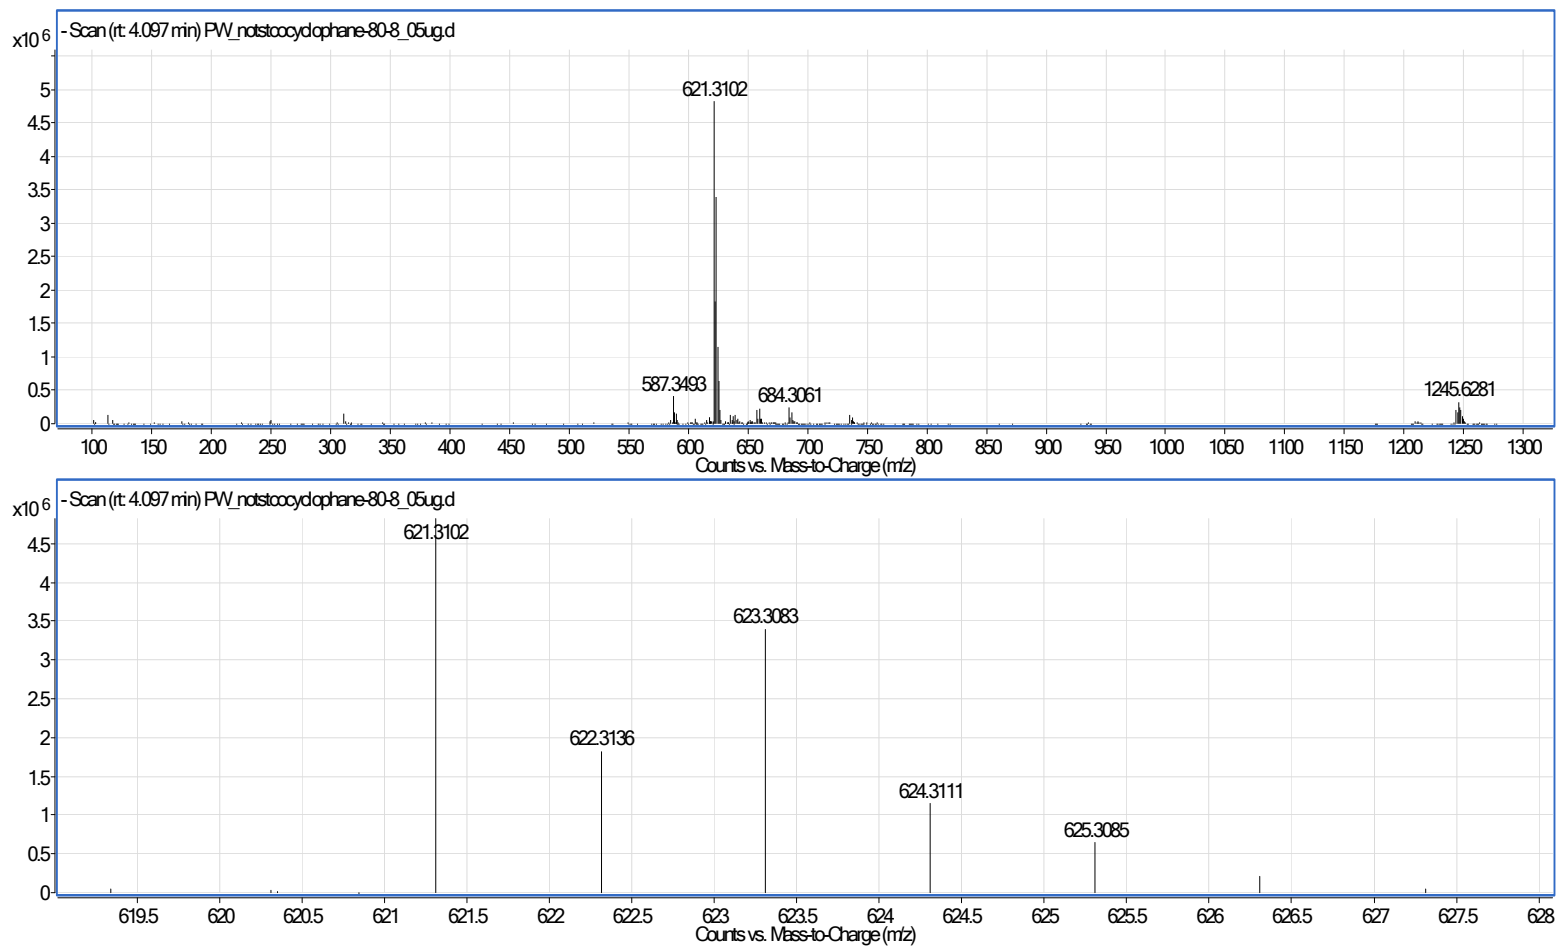

**Figure S30.** HR-ESI-MS Spectrum of **4**

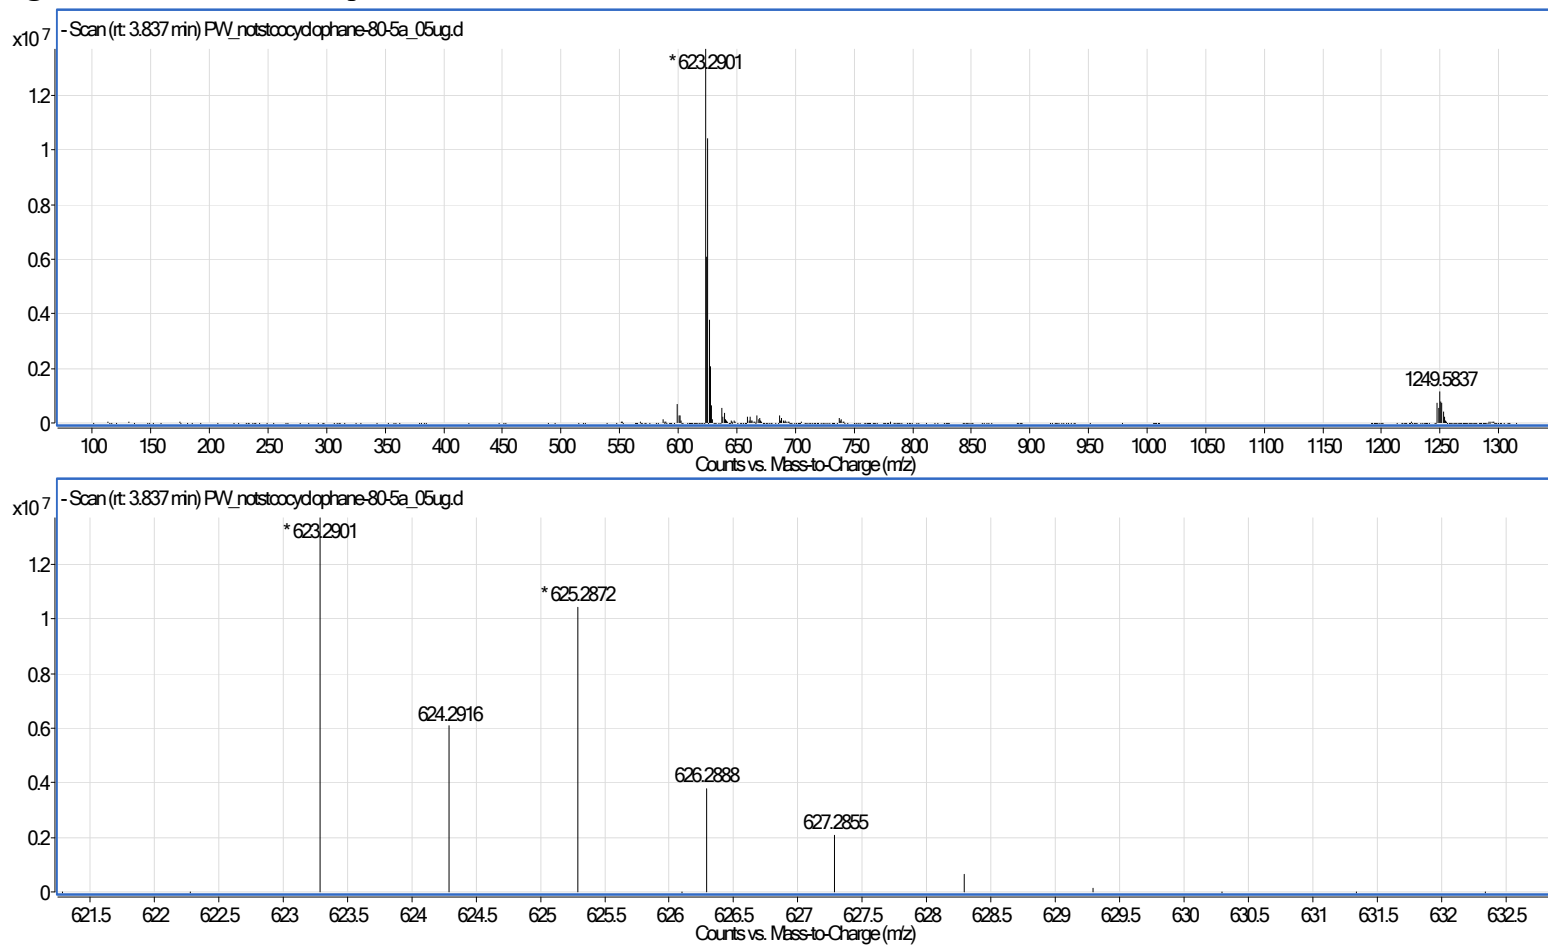



**Figure S31.** HR-ESI-MS Spectrum of **5**

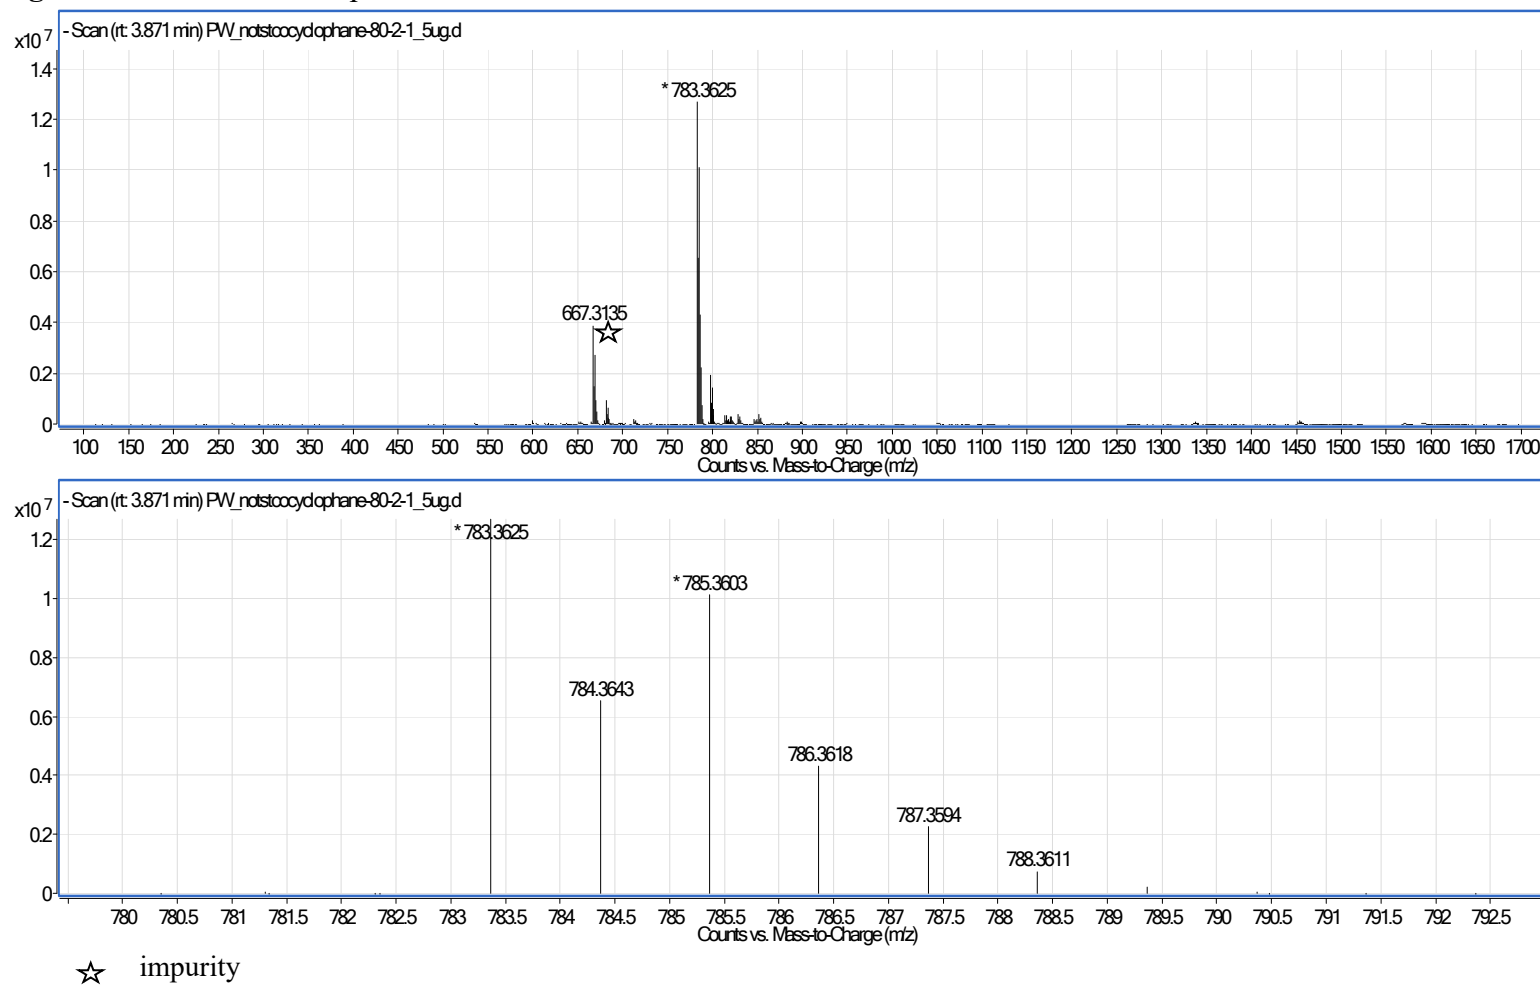

**Figure S32.** HR-ESI-MS Spectrum of **6**

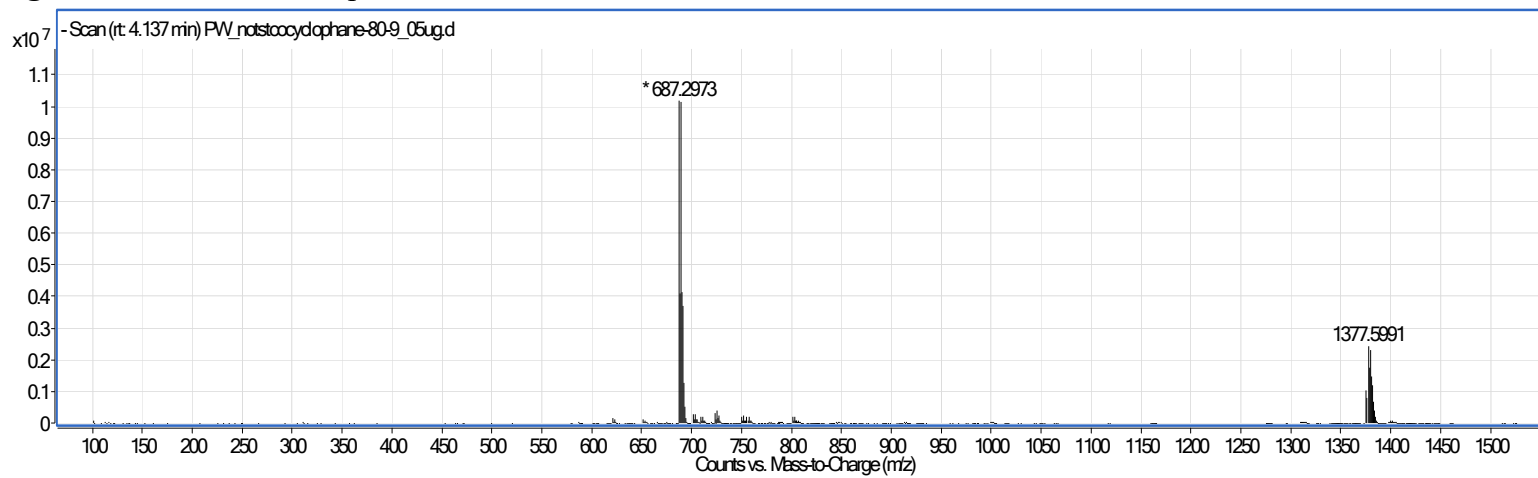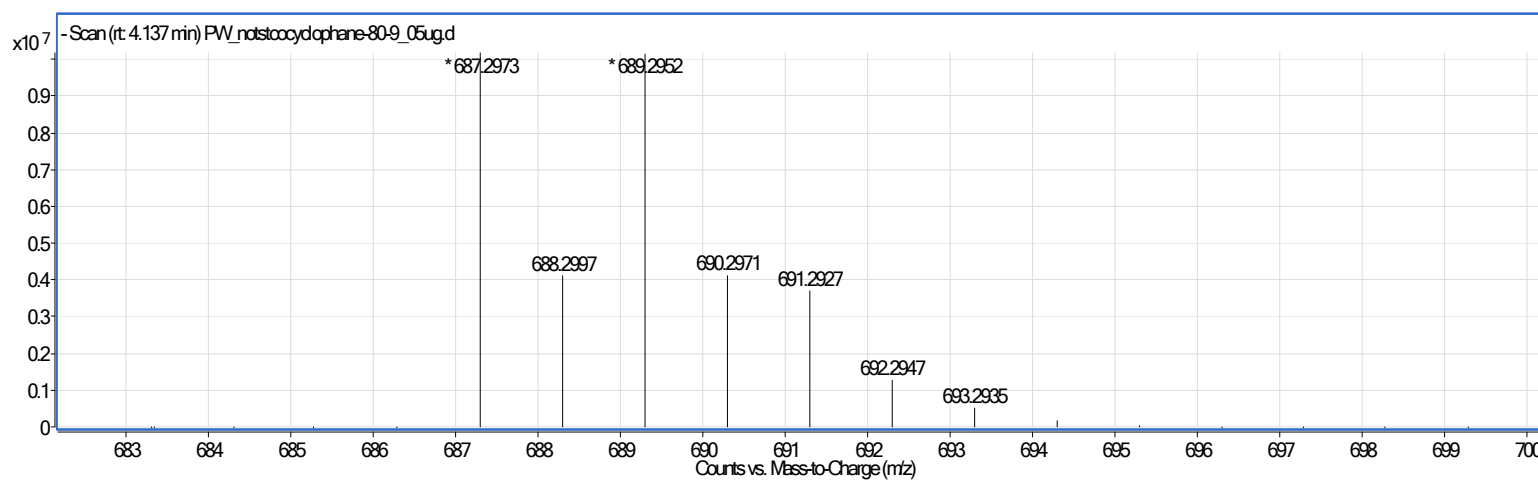

**Figure S33. Electronic Circular Dichroism Spectra (MeOH) of Nostocyclophane D, Dedichloronostocyclophane D, and 1-5**

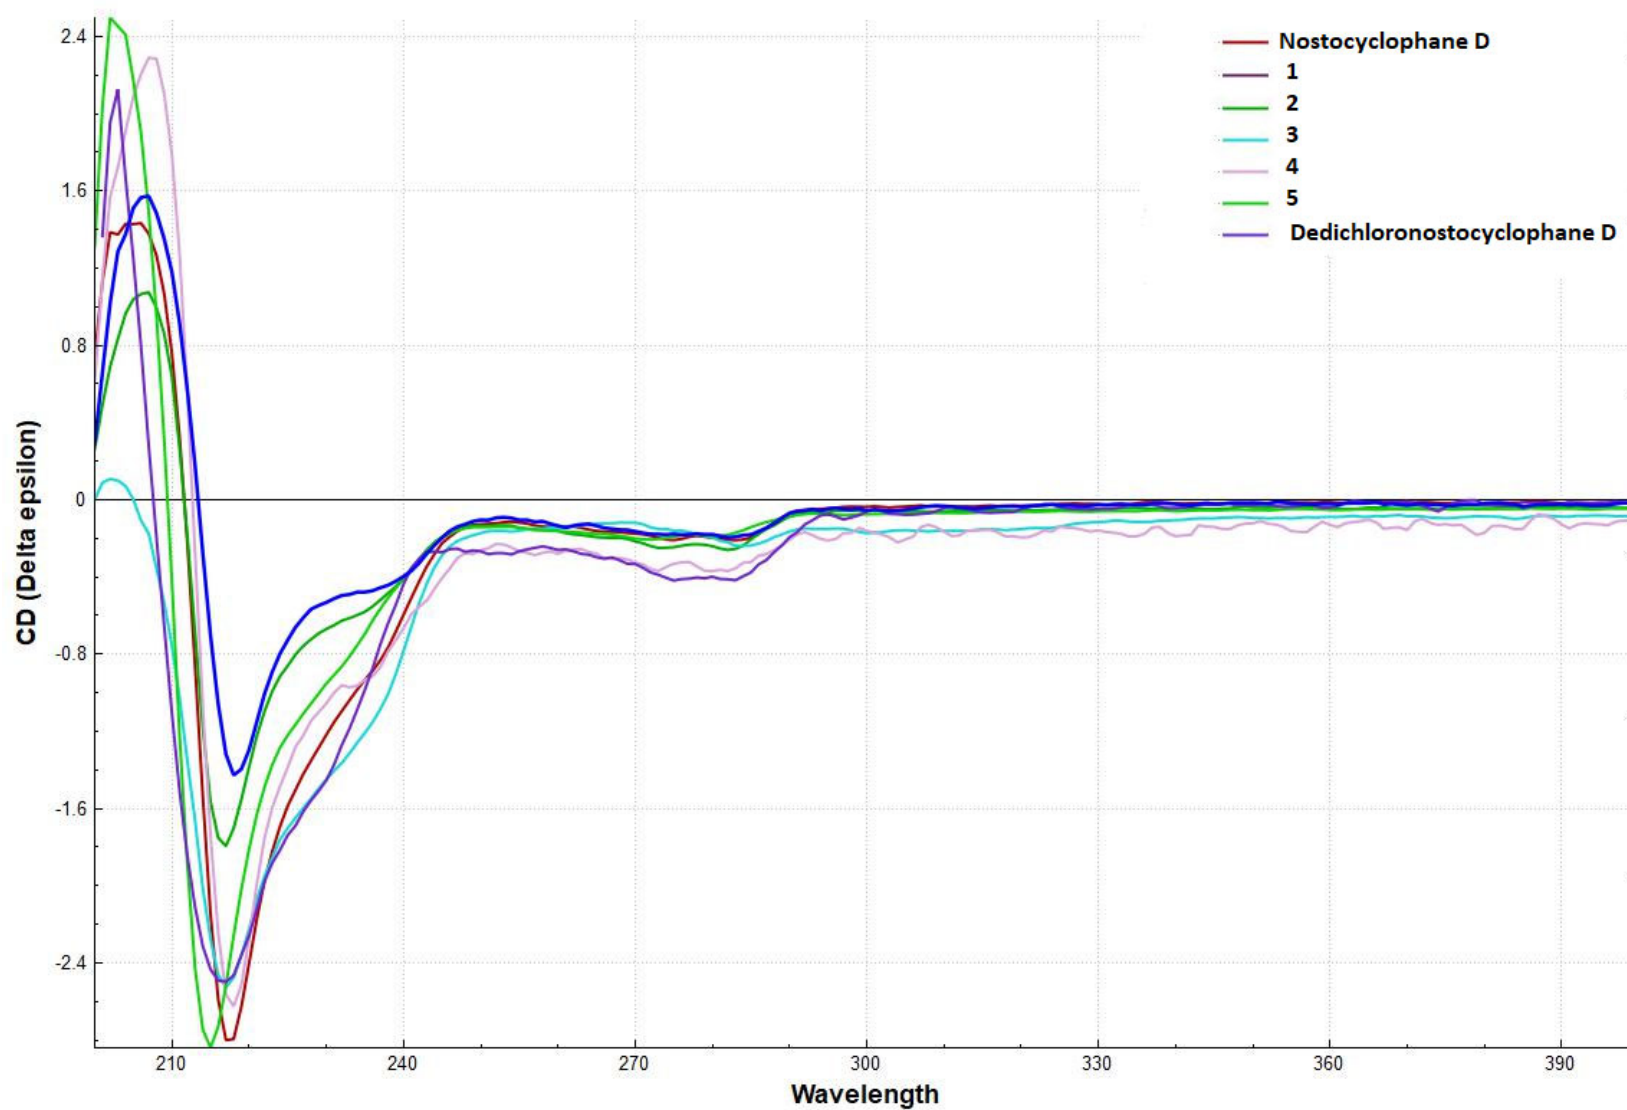

Spectra for compounds 2-5 have been scaled (amplitude increased) to make the comparison easier.

Figure S34. Electronic Circular Dichroism Spectra (MeOH) of 6

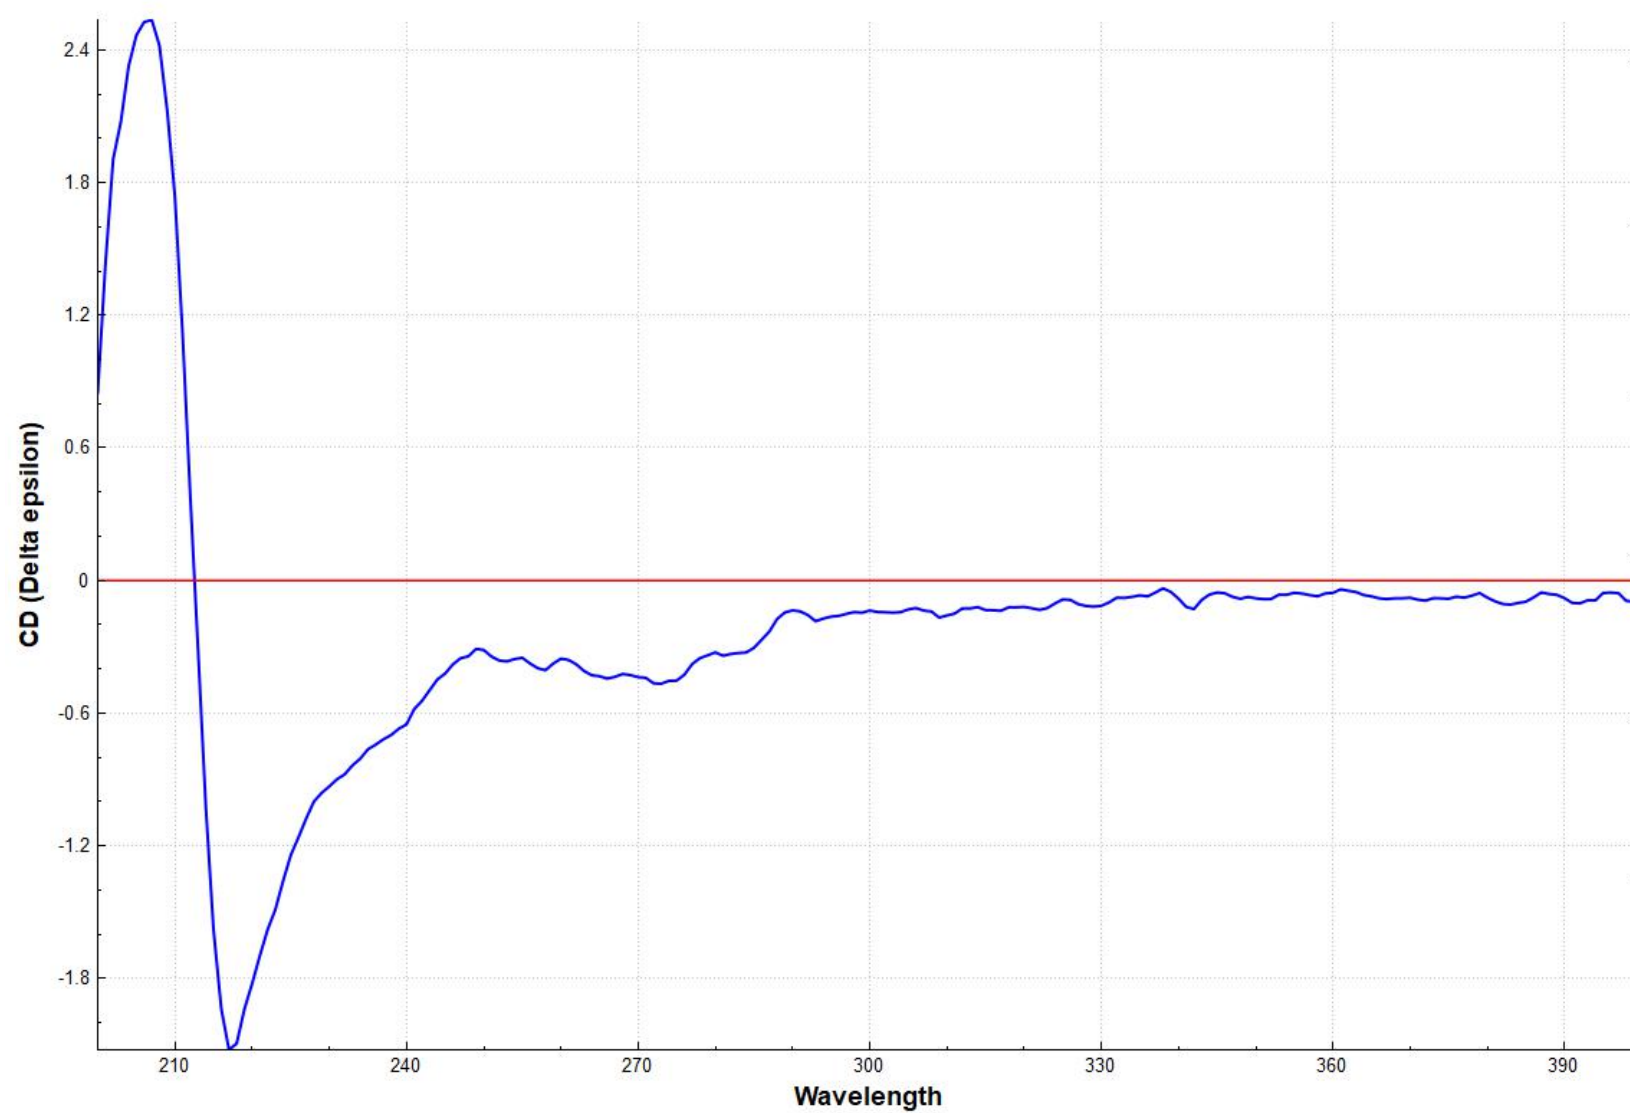

Supplement: s1 [file s1]
